# Supplementary material for: Possible relationship between general and pregnancy-related anxiety during the first half of pregnancy and the birth process: a prospective cohort study
Source: PubMed Central journal article supplement — BMJ Open. 2017 May 9;7(5):e013413. doi: 10.1136/bmjopen-2016-013413 (PMC5623367; doi:10.1136/bmjopen-2016-013413), 2017-05-09
Supplement: bmjopen-2016-013413.draft_revisions.pdf [file bmjopen-2016-013413.draft_revisions.pdf]

# BMJ Open

## Possible relationship between general and pregnancy-related anxiety during the first trimester of pregnancy and the birth process: a prospective cohort study

|                                 |                                                                                                                                                                                                                                                                                                                                                                                              |
|---------------------------------|----------------------------------------------------------------------------------------------------------------------------------------------------------------------------------------------------------------------------------------------------------------------------------------------------------------------------------------------------------------------------------------------|
| Journal:                        | <i>BMJ Open</i>                                                                                                                                                                                                                                                                                                                                                                              |
| Manuscript ID                   | bmjopen-2016-013413                                                                                                                                                                                                                                                                                                                                                                          |
| Article Type:                   | Research                                                                                                                                                                                                                                                                                                                                                                                     |
| Date Submitted by the Author:   | 12-Jul-2016                                                                                                                                                                                                                                                                                                                                                                                  |
| Complete List of Authors:       | Vrijkotte, Tanja; Academic Medical Center, University of Amsterdam, Public Health<br>Koelewijn, Johanna; Sanquin Research and Landsteiner Laboratory, University of Amsterdam, Experimental Immunohematology; Academic Medical Center, University of Amsterdam, Obstetrics and Gynecology<br>Sluijs, Anne; Leiden University Medical Center, University of Leiden, Obstetrics and Gynecology |
| <b>Primary Subject Heading</b>: | Obstetrics and gynaecology                                                                                                                                                                                                                                                                                                                                                                   |
| Secondary Subject Heading:      | Mental health                                                                                                                                                                                                                                                                                                                                                                                |
| Keywords:                       | anxiety, birth process, interventions, ethnicity, parity                                                                                                                                                                                                                                                                                                                                     |
|                                 |                                                                                                                                                                                                                                                                                                                                                                                              |

SCHOLARONE™  
Manuscripts

1  
2  
3 **Possible relationship between general and pregnancy-related anxiety during the first trimester of**  
4  
5 **pregnancy and the birth process: a prospective cohort study**  
6

Field Code Chan

7 Corresponding author:  
8

9  
10 T.G.M. Vrijkotte<sup>1</sup>, PhD  
11

12 <sup>1</sup>Department of Public Health, Academic Medical Center, University of Amsterdam, P.O. Box 22660,  
13 1100 DD Amsterdam, the Netherlands.

14 T: +31-20-5664523  
15

16  
17 E: t.vrijkotte@amc.uva.nl  
18

19 J.M. Koelewijn<sup>12</sup> PhD  
20

21 <sup>1</sup>Sanquin Research and Landsteiner Laboratory, University of Amsterdam, Department Experimental  
22 Immunohematology, Plesmanlaan 125, 1066 CX Amsterdam, the Netherlands.  
23

24  
25 <sup>2</sup>Department of Obstetrics and Gynaecology, Academic Medical Center, University of Amsterdam, P.O.  
26 Box 22660, 1100 DD Amsterdam, the Netherlands.  
27

28  
29  
30 Anne-Marie Sluijs, MSc<sup>4</sup>  
31

32 <sup>4</sup>Department Obstetrics and Gynecology, Leiden University Medical Center, University of Leiden, P.O.  
33 Box 9600, 2300 RC Leiden, the Netherlands.  
34

35  
36 **Keywords:** Anxiety, Birth process, Interventions, Ethnicity, Parity  
37

38  
39 **Word count:** 3450  
40  
41  
42  
43  
44  
45  
46  
47  
48  
49  
50  
51  
52  
53  
54  
55  
56  
57  
58  
59  
60

## ABSTRACT

**Objectives** The rate of interventions during childbirth has increased dramatically during the last decades. Maternal anxiety might play a role in the progress of the labour process and interventions during labour. This study aimed to identify associations between first trimester anxiety and the birth process, including any interventions required during labour. In addition, differences in the associations by parity and ethnicity were explored.

**Design** Prospective cohort study

**Setting** Primary care midwifery practices and secondary/tertiary care obstetric practices in Amsterdam, participating in the multi-ethnic ABCD study (participation rate 96%; response 8,266/12,373 (67%)).

**Participants** Included were women with singletons, alive at labour start, with a gestational age  $\geq 24$  weeks (n=6,443).

**Independent variable** General anxiety (STAI state) and pregnancy-related anxiety (PRAQ), were self-reported at the end of the first trimester.

**Outcomes** Associations between both forms of anxiety and several indicators of the birth process were analysed. Subgroup analyses were performed for parity and ethnicity.

**Results** The prevalence of high general anxiety (STAI score  $\geq 43$ ) and pregnancy-related anxiety (PRAQ score  $\geq 90$ ) were 30.9% and 11.0%, respectively. After adjustment, both general and pregnancy-related anxiety were associated with pain relief and/or sedation (OR for general anxiety 1.27;95%-CI 1.07-1.50;OR for pregnancy-related anxiety 1.51;95%-CI 1.21-1.88). In multiparae, general anxiety was associated with induction of labour (OR 1.61;95%-CI 1.19-2.19), pregnancy-related anxiety was associated with primary caesarean section (OR

1  
2  
3 1.67;95%-CI 1.02-2.75). In nulliparae, pregnancy-related anxiety was associated with referral  
4 during labour (OR 1.38; 95%-CI 1.02-1.86). Associations were largely similar for all ethnicities.  
5  
6

### 7 **Conclusions**

8  
9  
10 High levels of general and pregnancy-related anxiety in early pregnancy contribute modestly  
11 to more interventions during the birth process with similar associations between ethnic  
12 groups, but with some differences between primiparae and multiparae.  
13  
14  
15  
16

17  
18  
19  
20 **Abbreviations:** ABCD study = Amsterdam Born Children and their Development study, BMI =  
21 body mass index, PRN = Dutch Perinatal Registration, STAI = State Trait Anxiety Inventory,  
22  
23 PRAQ = Pregnancy-Related Anxiety Questionnaire  
24  
25  
26  
27

### 28 **ARTICLE SUMMARY**

- 29  
30  
31 - We studied the possible relationship between pregnancy-related as well general  
32 anxiety with the progression of the process of labour, while most studies only studied  
33 pregnancy-related anxiety.  
34  
35  
36  
37  
38  
39 - We performed a prospective study in a large multi-ethnic cohort.  
40  
41  
42 - We used validated questionnaires to assess both forms of anxiety.  
43  
44  
45  
46 - Anxiety was measured in the first trimester of pregnancy.  
47  
48  
49  
50  
51  
52  
53  
54  
55  
56  
57  
58  
59  
60

## INTRODUCTION

The rate of interventions during childbirth has increased dramatically in recent decades. For example, in the Netherlands, from 1993-2002 the caesarean section rate rose from 8.1% to 13.6%.<sup>[1]</sup> The rate of labour induction increased during 2008-2013 from 15% to 21%.<sup>[2]</sup> A similar rise in caesarean sections occurred in other western countries.<sup>[3-6]</sup>

The progression of the birth process and concomitant interventions are associated with maternal characteristics such as age, parity, body mass index (BMI), ethnicity, illness, infant birth weight, as well as with organisational factors, such as existing guidelines, the availability of 24-h pain relief, the profession of the obstetric care provider (midwife versus physician), and the level of care (primary/secondary).<sup>[7-11]</sup> Moreover, maternal anxiety might play a role in the birth process. Although one review found no overall association between anxiety and obstetric complications, specific types of anxiety (such as fear of childbirth) may be associated with specific complications and interventions, such as prolonged labour and caesarean section.<sup>[12]</sup>

Several studies have shown a relationship between fear of childbirth and elective caesarean section [13-16], duration of labour [17-19], emergency caesarean section [18, 20] and epidural analgesia.<sup>[21]</sup> On the other hand, other studies reported no such relationships.<sup>[22-24]</sup> One explanation for these inconsistencies could be differences in cultural, social and organisational characteristics between countries. These factors can mediate or exacerbate the effect of anxiety on the birth process and on concomitant interventions. Inconsistencies might also be explained by differences in maternal characteristics influencing the association between anxiety and the birth process. For example, some ethnic groups are more

1  
2  
3 susceptible to stress-induced neuroendocrine and inflammatory pathways which could lead to  
4  
5 adverse perinatal outcomes.[25-28] Also, cultural and social differences between ethnic  
6  
7 groups (e.g. language barriers, unfamiliarity with the obstetric care organisation) may explain  
8  
9 differences between ethnic groups regarding the influence of anxiety on the birth process.[29-  
10  
11 32] In addition, parity and level of care (factors associated with the progression of birth) might  
12  
13 influence the association between anxiety and the birth process.[7, 9-11] To our knowledge,  
14  
15 no study has investigated the level of care and ethnicity in the association between general  
16  
17 and pregnancy-related anxiety, and the progression of birth.  
18  
19  
20  
21

22  
23 If anxiety does have a detrimental effect on the birth process, screening early in pregnancy for  
24  
25 anxiety (and, where indicated, appropriate treatment) is desirable.  
26  
27  
28  
29

30  
31 Therefore, this study investigates the association between general anxiety and/or pregnancy-  
32  
33 related anxiety measured during the first trimester of pregnancy and the birth process, and  
34  
35 the interaction of this association with parity, ethnicity and the level of care at the start of  
36  
37 labour.  
38  
39  
40  
41  
42

## 43 **METHODS**

### 44 **Study design and participants**

45  
46  
47 Data were derived from the Amsterdam Born Children and their Development (ABCD) study, a  
48  
49 large multi-ethnic prospective cohort study.[33] The ABCD study is aimed at examining the  
50  
51 relationship between maternal lifestyle and psychosocial conditions during pregnancy and the  
52  
53 child's health at birth as well as later in life. Between January 2003 and March 2004,  
54  
55  
56  
57  
58  
59  
60

1  
2  
3 participating obstetric care providers (midwives and hospital obstetricians; participation rate  
4  
5 96%) invited pregnant women in Amsterdam at their first antenatal visit to enroll in the ABCD.  
6  
7 A total of 12,373 women were approached (99% of the target population). Within two weeks  
8  
9 of this first contact, women who agreed to take part were sent a questionnaire, covering  
10  
11 socio-demographic conditions, obstetric history and psychosocial conditions. Consent forms  
12  
13 were also sent for the linkage of study data to medical records as well as to data from the  
14  
15 Dutch Perinatal Registration (PRN).  
16  
17

18  
19  
20 A total of 8266 women (response rate 67%) filled in the pregnancy questionnaire at an  
21  
22 average of 16 weeks gestation (IQR 14-18 weeks) and 7043 gave permission for perusal of  
23  
24 their medical records. To facilitate participation by women unable to speak Dutch,  
25  
26 questionnaires were also available in Turkish, Arabic and English, and women could also  
27  
28 complete the questionnaire with the assistance of an interviewer. Participation of foreign-  
29  
30 born women was lower (42-64%) than for Dutch-born women (77%) but comparable with  
31  
32 response rates in other population-based, multi-ethnic studies in the Netherlands.[34] In the  
33  
34 present study we included women with a singleton pregnancy, a gestational age  $\geq 24$  weeks,  
35  
36 and a living foetus at the start of labour.  
37  
38  
39

40  
41  
42 Approval for the study was obtained from the Medical Ethical Committees of the participating  
43  
44 hospitals and the Registration Committee of the Municipality of Amsterdam. All women gave  
45  
46 written informed consent.  
47  
48  
49

## 50 51 52 53 **Definition and measurement of variables**

54  
55  
56 *General and pregnancy-related anxiety*  
57

1  
2  
3 General anxiety was assessed using the Dutch version of the State-Trait Anxiety Inventory  
4 (STAI).[35-36] The 20 items regarding the state anxiety subscale were included in our  
5  
6  
7 questionnaire, with each item scored on a 4-point scale. The anxiety score was dichotomised  
8  
9  
10 in low-average (<43 points) and high anxiety ( $\geq 43$  points).[37] In our sample, the internal  
11  
12 consistency (Cronbach's alpha) of the scale was 0.94.  
13

14  
15  
16 Pregnancy-related anxiety was assessed using an abbreviated 10-item version of the  
17  
18 Pregnancy-Related Anxieties Questionnaire (PRAQ).[38-39] The internal consistency  
19  
20 (Cronbach's alpha) was 0.79; each item was scored on a 4-point scale. Three aspects that can  
21  
22 be distinguished in the PRAQ are 'fear of labour', 'fear of bearing a physically or mentally  
23  
24 handicapped child' and 'concern about one's appearance'. In the present study we used the  
25  
26 total score on pregnancy-related anxiety. One question was only applicable for nulliparous  
27  
28 women ("I am scared of labour and birth because I have never experienced this"), resulting in  
29  
30 a maximum score of 40 for nulliparous women and 36 for multiparous women. Because cut-  
31  
32 off scores were not available for dichotomisation of the results from this instrument, we used  
33  
34 the 90<sup>th</sup> percentile to identify women with a high level of pregnancy-related anxiety.[40] This  
35  
36 resulted in cut-off scores of 28 and 24 for nulliparous and multiparous women, respectively.  
37  
38  
39  
40

#### 41 *Birth process*

42  
43  
44  
45 Outcome data on the birth process were obtained by linking our records with the PRN  
46  
47 database. Validation of the PRN database has been described previously.[34] The outcome  
48  
49 variables were determined from the records of the Registry of Midwives, the Registry of  
50  
51 Obstetricians and the Registry of Paediatricians according to the decision rules of the PRN.[41]  
52  
53  
54  
55  
56  
57  
58  
59  
60



1  
2  
3 We defined the following outcomes: primary caesarean (yes/no), induction of labour (yes/no),  
4  
5 referral during labour [only in the group that started labour under primary care; (yes/no)],  
6  
7 augmentation (yes/no), pain relief/sedation (yes/no), duration of first stage of labour ( $\leq 12$   
8  
9 h/ $>12$  h; only available in registry of midwives), secondary caesarean (yes/no), vaginal  
10  
11 instrumental delivery [ventouse or forceps; (yes/no), duration of second stage ( $< 1.5$  h/ $\geq 1.5$   
12  
13 h)].

### 14 15 16 17 18 *Covariates*

19  
20  
21 The following covariates were included in the analyses: maternal age (years), ethnicity,  
22  
23 education (years after primary school), pre-pregnancy BMI ( $\text{kg}/\text{m}^2$ ), parity  
24  
25 (nulliparae/multiparae), smoking during pregnancy (yes/no), alcohol use during pregnancy  
26  
27 (yes/no), hypertensive disorders and diabetes (pre-existent or detected during pregnancy),  
28  
29 gestational age at delivery (weeks), care at start of labour (primary/secondary), and birth  
30  
31 weight (g). Ethnicity was based on the birth country of the participant's mother (self-  
32  
33 reported) and included the following categories: Dutch, Turkish, Moroccan, Black  
34  
35 (Antillean/Aruban, Surinamese, Ghanaian or other African descent), other non-Western and  
36  
37 other Western countries. Pre-pregnancy weight and height, education, smoking and alcohol  
38  
39 use during pregnancy were self-reported in the questionnaire. Parity, birth weight, gestational  
40  
41 age, hypertension and diabetes were extracted from the PRN database.  
42  
43  
44  
45  
46  
47  
48  
49  
50

### 51 **Statistical analysis**

52  
53  
54 Descriptive statistics were used to profile the sample characteristics according to the level of  
55  
56 maternal general anxiety and of pregnancy-related anxiety. Categorical variables were  
57  
58

1  
2  
3 described by percentages per category. Continuous variables were described using the mean  
4  
5 and 95% confidence intervals (CI), if normally distributed and, if not, with the median and  
6  
7 minimum and maximum values. Risks were presented as odds ratios (OR) and 95% CI.

8  
9  
10 Differences were tested with Student's t test or Mann-Whitney U test for continuous variables  
11  
12 and Pearson's chi square test for categorical variables. Associations between high general  
13  
14 and/or pregnancy-related anxiety compared to low anxiety were analysed for each outcome  
15  
16 using multiple logistic regression analyses. All potential confounders were determined a priori  
17  
18 and added to the regression model in two steps. In the first step we adjusted for general  
19  
20 covariates: age, ethnicity, education, pre-pregnancy BMI, parity, smoking and alcohol use; in  
21  
22 the second step hypertension, diabetes, gestational age and birth weight were added to the  
23  
24 model to determine whether these pregnancy-related covariates confounded the association  
25  
26 between anxiety and each of the outcomes. Subgroup analyses were performed according to  
27  
28 parity (nulliparous versus multiparous women), ethnicity (Dutch, Turkish, Moroccan and  
29  
30 Black) and care at start of labour (primary/secondary care). No subgroup analysis was  
31  
32 performed in the ethnic groups 'other Western' and 'other non-Western' as each of these  
33  
34 groups represented a diverse selection of ethnicities. To formally test whether different  
35  
36 associations existed for the different subgroups (parity, ethnicity, and care at start of labour)  
37  
38 between STAI or PRAQ and the birth process variables, interaction terms were added to the  
39  
40 final model.  
41  
42  
43  
44  
45  
46  
47

48 All analyses were performed with SPSS 21.0 (IBM Statistics, USA).  
49  
50  
51  
52  
53  
54  
55  
56  
57  
58  
59  
60

## RESULTS

### Response

Of the 8266 women who completed the pregnancy questionnaire, for 6616 women valid results for the STAI or PRAQ and outcome data, were available. After exclusion of 173 women (with a multiple foetus, a gestational age  $\leq 24$  weeks, or antenatal death), 6443 records were available for analysis (Figure 1). Most women completed both the STAI and the PRAQ (n=6335); 37 women completed only the STAI and 71 women only the PRAQ.

### Covariates according to anxiety levels

A high STAI score (further referred to as 'high general anxiety') was found in 31.0% of the sample and a high score on the PRAQ (further referred to as 'high pregnancy-related anxiety') in 11.1% of the sample. The STAI score was moderately correlated with the PRAQ score (Pearson's  $r=0.36$ ;  $p<0.001$ ).

High general anxiety and high pregnancy-related anxiety were more frequently observed in younger women, in women with non-Dutch ethnicities, fewer years of education, higher pre-pregnancy BMIs, smoking women, women with less alcohol consumption, and in women who gave birth to babies with a lower birth weight. There were no differences in the rates of hypertension and gestational age between the high and low anxiety groups; however, diabetes and secondary care at the start of labour were more frequently observed in women with high general anxiety. Nulliparous women appeared to be at lower risk for high general

1  
2  
3 anxiety compared to multiparous women, but at an increased risk for high pregnancy-related  
4  
5 anxiety (Table 1).  
6  
7

8  
9 **Table 1. Maternal characteristics according to first trimester general anxiety and pregnancy-related anxiety**

|                                        |                   | General anxiety            |                             |                          | Pregnancy-related anxiety  |                            |                          |
|----------------------------------------|-------------------|----------------------------|-----------------------------|--------------------------|----------------------------|----------------------------|--------------------------|
|                                        |                   | Low<br>n=4400 <sup>1</sup> | High<br>n=1972 <sup>1</sup> | p-<br>value <sup>2</sup> | Low<br>n=5697 <sup>1</sup> | High<br>n=709 <sup>1</sup> | p-<br>value <sup>2</sup> |
| Anxiety score                          | -median (min-max) |                            |                             |                          |                            |                            |                          |
| Nulliparae                             |                   | 33 (20-42)                 | 49 (43-80)                  |                          | 21 (10-27)                 | 30 (28-40)                 |                          |
| Multiparae                             |                   | 33 (20-42)                 | 49 (43-74)                  |                          | 18 (9-23)                  | 26 (34-36)                 |                          |
| Age (years)                            | -mean (95% CI)    | 31.5 (31.4-31.7)           | 29.7 (29.5-30.0)            | <.001                    | 31.2 (31.1-31.4)           | 28.7 (28.3-29.2)           | <.001                    |
| Ethnicity                              | -%                |                            |                             | <.001                    |                            |                            | <.001                    |
| Dutch                                  |                   | 63.5                       | 38.9                        |                          | 58.8                       | 30.1                       |                          |
| Turkish                                |                   | 2.6                        | 8.6                         |                          | 3.6                        | 12.9                       |                          |
| Moroccan                               |                   | 5.4                        | 12.1                        |                          | 6.5                        | 15.3                       |                          |
| Black                                  |                   | 6.5                        | 12.8                        |                          | 8.6                        | 8.1                        |                          |
| Other                                  |                   | 14.1                       | 13.3                        |                          | 13.7                       | 14.4                       |                          |
| Western                                |                   |                            |                             |                          |                            |                            |                          |
| Other non-Western                      |                   | 7.9                        | 14.3                        |                          | 8.9                        | 19.3                       |                          |
| Education (years)                      | -mean (95% CI)    | 9.6 (9.5-9.7)              | 7.5 (7.3-7.7)               | <.001                    | 9.2 (9.1-9.3)              | 7.1 (6.8-7.5)              | <.001                    |
| Pre-pregnancy BMI (kg/m <sup>2</sup> ) | -mean (95% CI)    | 22.8 (22.7-22.9)           | 23.8 (23.6-24.0)            | <.001                    | 23.0 (22.9-23.1)           | 23.8 (23.5-24.1)           | <.001                    |
| Nulliparae                             | -%                | 59.1                       | 49.5                        | <.001                    | 55.5                       | 59.9                       | .025                     |
| Smoking in pregnancy                   | -%                | 7.3                        | 15.2                        | <.001                    | 9.0                        | 15.0                       | <.001                    |
| Alcohol in pregnancy                   | -%                | 24.7                       | 16.0                        | <.001                    | 22.9                       | 15.3                       | <.001                    |
| Hypertensive disorders                 | -%                | 12.2                       | 12.5                        | .70                      | 12.1                       | 12.9                       | .54                      |
| Diabetes                               | -%                | 1.8                        | 3.1                         | .001                     | 2.1                        | 3.1                        | .08                      |
| Gestational age                        | -%                |                            |                             | .27                      |                            |                            | .87                      |
| <37 weeks                              |                   | 5.0                        | 6.0                         |                          | 5.4                        | 5.1                        |                          |
| 37-41 weeks                            |                   | 85.7                       | 84.7                        |                          | 85.4                       | 85.2                       |                          |
| >=42 weeks                             |                   | 9.3                        | 9.3                         |                          | 9.2                        | 9.7                        |                          |
| Care start labour                      | -%                |                            |                             | <.001                    |                            |                            | .29                      |
| primary care                           |                   | 60.1                       | 54.6                        |                          | 58.6                       | 56.6                       |                          |
| secondary care                         |                   | 39.9                       | 45.4                        |                          | 41.4                       | 43.4                       |                          |
| Birth weight (g)                       | -mean (95% CI)    | 3473 (3456-3490)           | 3379 (3354-3405)            | <.001                    | 3450 (3435-3465)           | 3391 (3351-3431)           | .009                     |

1 Missing values were excluded (range 0-217). 2 Continuous variables: Student's t-test and/or Mann-Whitney U test; categorical variables Pearson's Chi square test

### Outcome prevalences

The prevalences of the indicators of the birth process are shown in Table 2.

For peer review only

1  
2  
3  
4  
5  
6  
7  
8  
9  
10  
11  
12  
13  
14  
15  
16  
17  
18  
19  
20  
21  
22  
23  
24  
25  
26  
27  
28  
29  
30  
31  
32  
33  
34  
35  
36  
37  
38  
39  
40  
41  
42  
43  
44  
45  
46  
47  
48  
49

**Table 2. Univariate and multivariate associations between first trimester general and pregnancy-related anxiety and labour process, overall and according to parity**

| Outcome                             | General anxiety    |                     |                  |                               | Pregnancy-related anxiety |                    |                  |                             |
|-------------------------------------|--------------------|---------------------|------------------|-------------------------------|---------------------------|--------------------|------------------|-----------------------------|
|                                     | Low<br>n=4400<br>% | High<br>n=1972<br>% | Crude model      | Adjusted model <sup>1</sup>   | Low<br>n=5697<br>%        | High<br>n=709<br>% | Crude model      | Adjusted model <sup>1</sup> |
|                                     |                    |                     | OR (95% CI)      | OR (95% CI)                   |                           |                    | OR (95% CI)      | OR (95% CI)                 |
| Primary caesarean                   | 5.5                | 5.6                 | 0.99 (0.78-1.25) | 1.01 (0.78-1.31)              | 5.4                       | 5.8                | 1.10 (0.78-1.55) | 1.32 (0.92-1.89)            |
| Nulliparae                          | 5.6                | 3.9                 | 0.68 (0.47-0.99) | 0.79 (0.53-1.18) <sup>6</sup> | 5.2                       | 4.3                | 0.80 (0.48-1.34) | 1.05 (0.61-1.80)            |
| Multiparae                          | 5.4                | 7.2                 | 1.31 (0.95-1.80) | 1.32 (0.93-1.87) <sup>6</sup> | 5.8                       | 8.2                | 1.54 (0.97-2.44) | 1.67 (1.02-2.75)            |
| Induction <sup>2</sup>              | 10.3               | 12.8                | 1.31 (1.11-1.56) | 1.25 (1.02-1.52)              | 10.8                      | 13.3               | 1.27 (0.99-1.61) | 1.07 (0.81-1.42)            |
| Nulliparae                          | 11.7               | 12.2                | 1.09 (0.86-1.38) | 1.02 (0.78-1.35) <sup>6</sup> | 11.8                      | 12.4               | 1.03 (0.74-1.42) | 0.91 (0.62-1.33)            |
| Multiparae                          | 8.2                | 13.4                | 1.74 (1.35-2.26) | 1.61 (1.19-2.19) <sup>6</sup> | 9.5                       | 14.7               | 1.69 (1.16-2.47) | 1.32 (0.85-2.06)            |
| Referral during labour <sup>3</sup> | 38.3               | 39.3                | 1.07 (0.92-1.24) | 1.14 (0.96-1.36)              | 37.7                      | 45.9               | 1.47 (1.18-1.83) | 1.27 (0.99-1.62)            |
| Nulliparae                          | 52.0               | 53.2                | 1.11 (0.91-1.36) | 1.13 (0.91-1.41)              | 51.7                      | 57.5               | 1.38 (1.04-1.83) | 1.38 (1.02-1.86)            |
| Multiparae                          | 18.8               | 23.6                | 1.33 (1.03-1.73) | 1.18 (0.88-1.58)              | 19.8                      | 25.9               | 1.43 (0.96-2.14) | 1.03 (0.66-1.62)            |
| Augmentation <sup>2</sup>           | 25.1               | 22.9                | 0.91 (0.79-1.03) | 0.99 (0.85-1.14)              | 24.3                      | 25.8               | 1.11 (0.92-1.34) | 0.98 (0.80-1.21)            |
| Nulliparae                          | 34.5               | 32.5                | 0.94 (0.80-1.11) | 0.97 (0.81-1.15)              | 34.4                      | 33.4               | 1.00 (0.80-1.26) | 0.98 (0.77-1.24)            |
| Multiparae                          | 11.7               | 13.1                | 1.18 (0.93-1.51) | 1.05(0.81-1.36)               | 12.1                      | 13.7               | 1.19 (0.81-1.74) | 1.03 (0.69-1.54)            |
| Pain relief/sedation <sup>2</sup>   | 14.9               | 16.9                | 1.18 (1.02-1.37) | 1.27 (1.07-1.50)              | 14.7                      | 21.8               | 1.68 (1.37-2.06) | 1.51 (1.21-1.88)            |
| Nulliparae                          | 21.3               | 26.6                | 1.37 (1.15-1.64) | 1.27 (1.05-1.54)              | 21.9                      | 30.2               | 1.63 (1.29-2.06) | 1.50 (1.17-1.92)            |
| Multiparae                          | 5.5                | 6.9                 | 1.28 (0.92-1.79) | 1.27 (0.88-1.82)              | 5.7                       | 8.6                | 1.57 (0.97-2.54) | 1.63 (0.98-2.72)            |
| Secondary caesarean <sup>2</sup>    | 9.7                | 9.7                 | 1.01 (0.84-1.22) | 1.01 (0.82-1.24)              | 9.5                       | 11.3               | 1.22 (0.94-1.59) | 1.13 (0.85-1.49)            |
| Nulliparae                          | 12.4               | 13.1                | 1.09 (0.87-1.37) | 1.02 (0.80-1.31)              | 12.3                      | 14.7               | 1.26 (0.93-1.70) | 1.22 (0.89-1.68)            |
| Multiparae                          | 5.8                | 6.2                 | 1.08 (0.77-1.53) | 1.00 (0.69-1.47)              | 5.9                       | 5.9                | 0.92 (0.51-1.66) | 0.90 (0.49-1.68)            |

| Outcome                            | General anxiety   |                     |                            |                                            | Pregnancy-related anxiety |                    |                            |                                            |
|------------------------------------|-------------------|---------------------|----------------------------|--------------------------------------------|---------------------------|--------------------|----------------------------|--------------------------------------------|
|                                    | Low<br>n=440<br>% | High<br>n=1972<br>% | Crude model<br>OR (95% CI) | Adjusted model <sup>1</sup><br>OR (95% CI) | Low<br>n=5697<br>%        | High<br>n=709<br>% | Crude model<br>OR (95% CI) | Adjusted model <sup>1</sup><br>OR (95% CI) |
| First stage >12 hr <sup>4</sup>    | 19.5              | 20.1                | 1.05 (0.87-1.26)           | 1.09 (0.88-1.35)                           | 19.4                      | 21.9               | 1.21 (0.93-1.59)           | 0.96 (0.71-1.30)                           |
| Nulliparae                         | 30.5              | 33.1                | 1.12 (0.90-1.39)           | 1.02 (0.80-1.29)                           | 31.1                      | 31.1               | 1.03 (0.76-1.40)           | 0.88 (0.64-1.22)                           |
| Multiparae                         | 3.9               | 5.8                 | 1.65 (0.99-2.74)           | 1.48 (0.86-2.56)                           | 4.4                       | 7.2                | 1.93 (0.96-3.89)           | 1.64 (0.78-3.45)                           |
| Second stage >=90 min <sup>5</sup> | 11.1              | 7.1                 | 0.60 (0.48-0.75)           | 0.88 (0.69-1.12)                           | 10.0                      | 8.9                | 0.86 (0.63-1.18)           | 0.96 (0.68-1.34)                           |
| Nulliparae                         | 18.4              | 12.6                | 0.62 (0.49-0.80)           | 0.80 (0.62-1.03) <sup>6</sup>              | 17.2                      | 14.5               | 0.79 (0.56-1.10)           | 0.95 (0.67-1.35)                           |
| Multiparae                         | 1.3               | 2.0                 | 1.53 (0.79-2.97)           | 1.86 (0.91-3.79) <sup>6</sup>              | 1.6                       | 1.3                | 0.84 (0.26-2.77)           | 0.92 (0.26-3.23)                           |
| Instrumental delivery <sup>5</sup> | 12.5              | 10.0                | 0.78 (0.64-0.94)           | 1.08 (0.87-1.33)                           | 11.8                      | 11.2               | 0.93 (0.70-1.23)           | 0.99 (0.73-1.34)                           |
| Nulliparae                         | 19.6              | 17.1                | 0.86 (0.70-1.07)           | 1.07 (0.85-1.35)                           | 19.1                      | 17.5               | 0.89 (0.66-1.20)           | 1.04 (0.75-1.43)                           |
| Multiparae                         | 3.0               | 3.3                 | 1.02 (0.63-1.66)           | 1.16 (0.69-1.95)                           | 3.2                       | 2.1                | 0.68 (0.27-1.71)           | 0.80 (0.31-2.05)                           |

<sup>1</sup>Adjusted for BMI, maternal age, years of education, ethnicity, smoking, alcohol, diabetes, hypertension, gestational age, birth weight <sup>2</sup>Excluded women with primary caesarean section. <sup>3</sup>Only women under primary care at start of labour <sup>4</sup>Excluded women with caesarean section; data available for 3533 women (only recorded in perinatal registry of midwives) <sup>5</sup>Excluded women with caesarean section (primary/ secondary) <sup>6</sup>p-value interaction parity and anxiety <.05

1  
2  
3  
4 Most prevalences were higher (p-values <0.05) in nulliparous than in multiparous women,  
5 except primary caesarean section (p=0.09). Most prevalences were similar in the different  
6 ethnicities, except for a higher prevalence of prolonged second stage of labour and  
7 instrumental delivery in the Dutch women (p<0.001).  
8

### 9 10 **Multivariate analyses**

11 In all analyses, after adjustment for general covariates, there were no major changes in the  
12 models when, in the second step, also the pregnancy-related covariates (hypertension,  
13 diabetes, gestational age and birth weight) were added. Therefore, only the crude models and  
14 the fully adjusted models are presented.  
15

#### 16 17 *General anxiety and parity*

18  
19 After full adjustment, women with high general anxiety were more likely to undergo induction  
20 of labour and receive pain relief/sedation. Subgroup analysis showed that the association with  
21 induction of labour was only significant in multiparous women (OR 1.61; 95% CI 1.19-2.19; p-  
22 value for interaction 0.025) (Table 2). Moreover, significant interactions between parity and  
23 general anxiety were found for primary caesarean section (p-value 0.045) and a second stage  
24 of  $\geq 90$  min (p-value 0.011): highly anxious multiparous women were more likely to  
25 experience these two outcomes than highly anxious nulliparous women.  
26

#### 27 28 *Pregnancy-related anxiety and parity*

29  
30 After full adjustment, women with high pregnancy-related anxiety, both nulliparous and  
31 multiparous women, were more likely to receive pain relief/sedation. Subgroup analysis  
32 showed an increased risk for referral during labour in highly anxious nulliparous women and  
33 an increased risk for primary caesarean in highly anxious multiparous women; however, no  
34 significant interactions with parity were observed when formal interaction testing was  
35 completed (Table 2).  
36

#### 37 38 39 40 *General and pregnancy-related anxiety and ethnicity*

41  
42 No significant interactions were found between general or pregnancy-related anxiety with  
43 ethnicity for any of the outcome measures (all p-values  $\geq 0.12$ ). However, subgroup analyses  
44 suggested a significant association between pregnancy-related anxiety and instrumental  
45 delivery in Turkish women (OR 3.47; 95% CI 1.03-11.6), which was not present in the total  
46 group (Table 3).  
47  
48  
49  
50  
51  
52  
53  
54  
55  
56  
57  
58  
59  
60



**Table 3. Univariate and multivariate associations between first trimester general and pregnancy-related anxiety and labour process, according to ethnicity**

| Outcome                             | General anxiety    |                     |                         |                             | Pregnancy-related anxiety |                    |                  |                             |
|-------------------------------------|--------------------|---------------------|-------------------------|-----------------------------|---------------------------|--------------------|------------------|-----------------------------|
|                                     | Low<br>n=3430<br>% | High<br>n=1426<br>% | Crude model             | Adjusted model <sup>1</sup> | Low<br>n=4404<br>%        | High<br>n=469<br>% | Crude model      | Adjusted model <sup>1</sup> |
|                                     |                    |                     | OR (95% CI)             | OR (95% CI)                 |                           |                    | OR (95% CI)      | OR (95% CI)                 |
| Primary caesarean                   |                    |                     |                         |                             |                           |                    |                  |                             |
| Dutch                               | 5.6                | 7.0                 | 1.29 (0.94-1.79)        | 1.23 (0.88-1.73)            | 5.9                       | 6.1                | 1.05 (0.59-1.87) | 1.09 (0.60-1.96)            |
| Turkish                             | 3.4                | 3.6                 | 1.07 (0.30-3.88)        | 0.98 (0.23-4.19)            | 3.4                       | 3.3                | 1.26 (0.30-5.20) | 1.95 (0.39-9.82)            |
| Moroccan                            | 5.2                | 2.1                 | 0.40 (0.14-1.15)        | 0.32 (0.10-1.09)            | 3.3                       | 3.8                | 1.21 (0.38-3.58) | 1.22 (0.33-4.48)            |
| Black                               | 6.5                | 4.4                 | 0.65 (0.29-1.44)        | 0.80 (0.31-2.01)            | 6.1                       | 1.8                | 0.33 (0.04-2.45) | 0.44 (0.05-3.60)            |
| Induction <sup>2</sup>              |                    |                     |                         |                             |                           |                    |                  |                             |
| Dutch                               | 10.1               | 13.3                | <b>1.39 (1.08-1.79)</b> | 1.31 (0.98-1.75)            | 10.7                      | 12.5               | 1.19 (0.77-1.84) | 0.99 (0.61-1.63)            |
| Turkish                             | 10.7               | 13.5                | 1.29 (0.60-2.74)        | 1.13 (0.46-2.77)            | 12.8                      | 13.8               | 1.05 (0.47-2.31) | 0.97 (0.38-2.48)            |
| Moroccan                            | 9.5                | 10.3                | 1.11 (0.59-2.09)        | 0.91 (0.45-1.82)            | 9.9                       | 9.8                | 0.96 (0.44-2.10) | 0.96 (0.42-2.21)            |
| Black                               | 8.2                | 12.2                | 1.69 (0.92-3.08)        | 1.99 (0.96-4.12)            | 9.4                       | 14.5               | 1.57 (0.66-3.74) | 1.22 (0.41-3.58)            |
| Referral during labour <sup>3</sup> |                    |                     |                         |                             |                           |                    |                  |                             |
| Dutch                               | 36.3               | 38.5                | 1.13 (0.90-1.42)        | 1.27 (0.98-1.64)            | 36.2                      | 45.5               | 1.44 (0.99-2.10) | 1.30 (0.86-1.96)            |
| Turkish                             | 44.9               | 34.0                | 0.63 (0.33-1.21)        | 0.59 (0.28-1.27)            | 33.3                      | 47.4               | 2.13 (1.07-4.20) | 1.68 (0.75-3.74)            |
| Moroccan                            | 41.5               | 47.4                | 1.15 (0.72-1.86)        | 1.37 (0.80-2.34)            | 43.2                      | 51.6               | 1.35 (0.75-2.42) | 1.21 (0.64-2.31)            |
| Black                               | 39.1               | 39.8                | 1.08 (0.65-1.79)        | 1.16 (0.65-2.08)            | 39.8                      | 34.3               | 0.92 (0.42-2.00) | 0.93 (0.39-2.20)            |
| Augmentation <sup>2</sup>           |                    |                     |                         |                             |                           |                    |                  |                             |
| Dutch                               | 24.2               | 22.4                | 0.91 (0.75-1.11)        | 0.95 (0.77-1.18)            | 23.5                      | 28.6               | 1.31 (0.95-1.81) | 1.09 (0.78-1.53)            |
| Turkish                             | 21.4               | 22.2                | 1.09 (0.61-1.96)        | 1.17 (0.62-2.22)            | 20.5                      | 25.3               | 1.31 (0.70-2.43) | 1.23 (0.62-2.43)            |
| Moroccan                            | 24.1               | 23.3                | 0.96 (0.62-1.49)        | 1.18 (0.73-1.92)            | 24.3                      | 22.5               | 0.97 (0.57-1.66) | 0.95 (0.53-1.69)            |
| Black                               | 22.6               | 21.0                | 0.95 (0.61-1.47)        | 1.04 (0.65-1.66)            | 21.9                      | 20.8               | 1.01 (0.49-2.06) | 0.96 (0.45-2.04)            |
| Pain relief/ sedation <sup>2</sup>  |                    |                     |                         |                             |                           |                    |                  |                             |
| Dutch                               | 13.8               | 17.7                | 1.35 (1.08-1.69)        | 1.31 (1.03-1.67)            | 14.0                      | 25.1               | 2.08 (1.48-2.92) | 1.69 (1.18-2.41)            |
| Turkish                             | 15.2               | 14.8                | 1.01 (0.51-1.98)        | 0.99 (0.45-2.17)            | 13.8                      | 19.5               | 1.67 (0.83-3.34) | 1.90 (0.84-4.27)            |
| Moroccan                            | 12.7               | 16.4                | 1.36 (0.80-2.33)        | 1.74 (0.96-3.13)            | 12.7                      | 18.6               | 1.71 (0.94-3.11) | 1.67 (0.87-3.23)            |
| Black                               | 15.1               | 13.7                | 0.91 (0.55-1.52)        | 0.98 (0.55-1.76)            | 13.7                      | 22.6               | 2.02 (0.99-4.12) | 2.05 (0.90-4.66)            |
| Secondary caesarean <sup>2</sup>    |                    |                     |                         |                             |                           |                    |                  |                             |
| Dutch                               | 8.6                | 10.1                | 1.19 (0.90-1.59)        | 1.17 (0.87-1.57)            | 8.7                       | 12.1               | 1.37 (0.87-2.16) | 1.21 (0.76-1.92)            |
| Turkish                             | 6.3                | 9.3                 | 1.47 (0.57-3.77)        | 1.44 (0.51-4.07)            | 7.2                       | 8.0                | 1.32 (0.50-3.44) | 1.35 (0.47-3.82)            |
| Moroccan                            | 10.0               | 7.8                 | 0.71 (0.37-1.38)        | 0.80 (0.43-1.48)            | 9.0                       | 8.8                | 0.91 (0.40-2.07) | 0.92 (0.38-2.19)            |
| Black                               | 15.1               | 10.3                | 0.67 (0.38-1.16)        | 0.80 (0.43-1.48)            | 12.1                      | 15.1               | 1.44 (0.64-3.25) | 1.68 (0.67-4.19)            |

| Outcome                            | General anxiety    |                     |                            |                                            | Pregnancy-related anxiety |                    |                                            |                            |
|------------------------------------|--------------------|---------------------|----------------------------|--------------------------------------------|---------------------------|--------------------|--------------------------------------------|----------------------------|
|                                    | Low<br>n=3430<br>% | High<br>n=1426<br>% | Crude model<br>OR (95% CI) | Adjusted model <sup>1</sup><br>OR (95% CI) | Low<br>n=4404<br>%        | High<br>n=469<br>% | Adjusted model <sup>1</sup><br>OR (95% CI) | Crude model<br>OR (95% CI) |
| First stage >12 hr <sup>4</sup>    |                    |                     |                            |                                            |                           |                    |                                            |                            |
| Dutch                              | 17.9               | 19.1                | 1.09 (0.82-1.44)           | 1.16 (0.86-1.58)                           | 18.1                      | 19.1               | 1.09 (0.67-1.78)                           | 0.92 (0.55-1.54)           |
| Turkish                            | 14.5               | 19.1                | 1.47 (0.63-3.43)           | 1.15 (0.41-3.23)                           | 17.5                      | 16.7               | 1.02 (0.42-2.44)                           | 0.52 (0.17-1.60)           |
| Moroccan                           | 21.8               | 19.0                | 0.86 (0.48-1.57)           | 0.98 (0.49-1.94)                           | 20.1                      | 21.0               | 1.11 (0.54-2.28)                           | 0.91 (0.41-2.02)           |
| Black                              | 20.2               | 22.0                | 1.16 (0.59-2.29)           | 1.35 (0.61-2.95)                           | 21.3                      | 17.2               | 0.82 (0.29-2.31)                           | 0.98 (0.31-3.10)           |
| Second stage >=90 min <sup>5</sup> |                    |                     |                            |                                            |                           |                    |                                            |                            |
| Dutch                              | 12.6               | 8.9                 | 0.68 (0.50-0.92)           | 0.81 (0.59-1.12)                           | 11.7                      | 13.0               | 1.12 (0.70-1.77)                           | 1.02 (0.63-1.65)           |
| Turkish                            | 4.9                | 5.6                 | 1.17 (0.37-3.70)           | 1.14 (0.34-3.86)                           | 3.4                       | 10.3               | 3.04 (0.98-9.39)                           | 2.72 (0.81-9.15)           |
| Moroccan                           | 7.7                | 4.8                 | 0.47 (0.19-1.17)           | 0.59 (0.23-1.54)                           | 6.3                       | 6.5                | 0.95 (0.34-2.63)                           | 0.95 (0.33-2.80)           |
| Black                              | 2.9                | 3.6                 | 1.26 (0.42-3.81)           | 1.46 (0.44-4.78)                           | 3.3                       | 2.4                | 0.75 (0.10-5.91)                           | 0.76 (0.09-6.53)           |
| Instrumental delivery <sup>5</sup> |                    |                     |                            |                                            |                           |                    |                                            |                            |
| Dutch                              | 13.6               | 12.0                | 0.88 (0.67-1.14)           | 0.99 (0.74-1.32)                           | 13.3                      | 12.6               | 0.93 (0.59-1.47)                           | 0.79 (0.49-1.28)           |
| Turkish                            | 6.7                | 5.4                 | 0.83 (0.29-2.36)           | 0.83 (0.27-2.56)                           | 3.9                       | 11.3               | 3.02 (1.05-8.69)                           | 3.47 (1.03-11.6)           |
| Moroccan                           | 5.1                | 9.3                 | 1.62 (0.72-3.63)           | 2.11 (0.89-4.98)                           | 6.5                       | 8.6                | 1.29 (0.52-3.17)                           | 1.26 (0.49-3.24)           |
| Black                              | 5.1                | 4.3                 | 0.85 (0.34-2.09)           | 1.15 (0.43-3.07)                           | 4.7                       | 4.4                | 1.00 (0.22-4.47)                           | 1.26 (0.25-6.42)           |

<sup>1</sup>Adjusted for BMI, maternal age, years of education, ethnicity, smoking, alcohol, diabetes, hypertension, gestational age, birth weight <sup>2</sup>Excluded women with primary caesarean section. <sup>3</sup>Only women under primary care at start of labour <sup>4</sup>Excluded women with caesarean section; data available for 3530 women (only recorded in perinatal registry of midwives) <sup>5</sup>Excluded women with caesarean section (primary/ secondary)

1  
2  
3  
4  
5  
6 *General and pregnancy-related anxiety and level of care*  
7  
8

9 No significant interactions were found between general or pregnancy-related anxiety with the  
10 level at care at the start of labour for any of the outcome measures (all p-values  $\geq 0.07$ ).  
11

12  
13 However, in the subgroup analyses, the risk for pain relief/sedation showed a greater increase  
14 in highly anxious women who started labour in secondary care (general anxiety: OR 1.30; 95%  
15 CI 1.03-1.63; pregnancy-related anxiety: OR 1.88; 95% CI 1.33-2.46) compared to those who  
16 began labour in primary care (general anxiety: OR 1.14; 95% CI 0.88-1.47; pregnancy-related  
17 anxiety: OR 1.23; 95% CI 0.88-1.73); however, the interactions were not significant (p-values  
18 0.34 and 0.17, respectively) (supplemental Table).  
19  
20  
21  
22  
23  
24  
25  
26  
27  
28  
29  
30  
31  
32  
33  
34  
35  
36  
37  
38  
39  
40  
41  
42  
43  
44  
45  
46  
47  
48  
49  
50  
51  
52  
53  
54  
55  
56  
57  
58  
59  
60

## DISCUSSION

### Main findings

In this multi-ethnic cohort, general anxiety and pregnancy-related anxiety, as measured in the first trimester of pregnancy, were associated with an increased risk for interventions during labour, but not with the progression of birth. Pregnancy-related anxiety showed stronger associations than general anxiety. Some associations differed between primiparae and multiparae, whereas similar associations were found across all ethnic groups.

### Strengths and limitations

A major strength of the present study is the prospective design in a large multi-ethnic cohort. Although the participation of non-Dutch women was lower than that of Dutch women, we collected data for  $\geq 2800$  non-Dutch women, making it possible to perform subgroup analyses in the four major ethnic groups in the Netherlands. However, the sample sizes were not large enough to prove a potential interaction effect of ethnicity and anxiety with less frequent outcomes. Although our sample might not be representative for all pregnant women in Amsterdam or in the Netherlands, there is no reason to assume that the association between anxiety and the birth process should be different in non-responders.

Another strength is the assessment of both general anxiety and pregnancy-related anxiety, using validated questionnaires, while most other studies only assessed pregnancy-related anxiety.

1  
2  
3 A limitation of the abbreviated 10-item version of the PRAQ that we used, is that this  
4  
5 questionnaire has only been validated in nulliparous women. Because one item of the 3-item  
6  
7 subscale 'fear of labour' was not applicable for multiparae, the assessment of this aspect in  
8  
9 multiparae was limited. Therefore, we only used the total PRAQ score and could not  
10  
11 distinguish between the different aspects of pregnancy-related anxiety. This is in agreement  
12  
13 with other questionnaires, such as the Wijma Delivery Expectancy Questionnaire) (W-DEQ; a  
14  
15 frequently used questionnaire) conceptualized as a uni-dimensional instrument to measure  
16  
17 fear of childbirth.[42] Outcome data on the birth process and interventions were available  
18  
19 from the PRN. A possible limitation of this might be that not all outcome data were  
20  
21 completely registered. However, the amount of missing data was limited and there is no  
22  
23 reason to assume that data were missing in a selective manner. Since the collection of our  
24  
25 data in 2003-2004, the prevalence of interventions during labour has increased.[1-2, 43]  
26  
27 Nevertheless, we think that the associations between anxiety and the birth process have  
28  
29 remained similar.  
30  
31  
32  
33  
34

35  
36 Anxiety was measured in the first trimester of pregnancy, while other studies measured  
37  
38 anxiety later in pregnancy.[19] Little evidence is available concerning how anxiety in the first  
39  
40 trimester persists and evolves during pregnancy. However, assessment of anxiety in the first  
41  
42 trimester allows provides the opportunity to perform an intervention to reduce anxiety,  
43  
44 particularly pregnancy-related anxiety.  
45  
46  
47  
48  
49  
50

### 51 52 **Comparison with other studies** 53 54

1  
2  
3 Some studies found no association between general anxiety and the birth process [19,44]  
4  
5 whereas Adams et al. were the only group to find a trend for increased risk for labour  
6  
7 induction in general anxious women in a cohort of 2206 women.[17] To our knowledge, our  
8  
9 study is the first to show a significant association between general anxiety and interventions  
10  
11 during birth. The difference between our study and others might be explained by a lack of  
12  
13 power in other studies (including 88 and 1515 women, respectively), as well as by different  
14  
15 views on the management of labour, e.g. the use of pain relief. Moreover, the other studies  
16  
17 did not investigate the association between anxiety and labour induction, as this is not  
18  
19 considered to be an 'undesirable' outcome.  
20  
21  
22  
23

24  
25 Our observed association between pregnancy-related anxiety and pain relief/sedation is in  
26  
27 line with other studies reporting an association between fear of labour and epidural  
28  
29 analgesia.[21, 45] Several studies found an association between fear of labour and elective  
30  
31 caesarean section.[13-16] Although we found no association between general or pregnancy-  
32  
33 related anxiety and primary caesarean, an interaction was seen between parity and general  
34  
35 anxiety, suggesting a decreased risk for anxious nulliparae and an increased risk for  
36  
37 multiparae. This might reflect the restraint of obstetricians in the Netherlands to perform an  
38  
39 elective caesarean in nulliparae. In anxious multiparae with a complicated birth history,  
40  
41 obstetric caregivers will be more willing to perform a caesarean section. Although others  
42  
43 reported an association between fear of labour and emergency caesarean section this was not  
44  
45 seen in our study.[18, 20]  
46  
47  
48  
49

50  
51 Several studies found a longer duration of labour in women with high fear of labour.[17-19]  
52  
53 We did not find such an association; unfortunately, however, in our study data on the  
54  
55 duration of the first stage of labour were only available in categories of six hours.  
56  
57  
58  
59  
60

1  
2  
3 Subgroup analyses showed some different effects in nulliparae and multiparae. Parity is  
4  
5 known to be associated with the birth process, which was confirmed in the present study.[7,  
6  
7 9-10] The different effect of anxiety on the birth process in nulliparae and multiparae can be  
8  
9 explained by physiological factors, and by the woman's experience during the previous labour  
10  
11 and the information available for the care provider on the previous birth process. The  
12  
13 increased risk for induction of labour in multiparae with high general anxiety may be due to  
14  
15 greater confidence by obstetric caregivers that the induction will be successful in multiparae.  
16  
17 An increased risk for referral during labour was only seen in nulliparous women with high  
18  
19 pregnancy-related anxiety. This can be explained by the lower a priori risk for referral in  
20  
21 multiparae and the subsequent greater confidence of primary care midwives in a successful  
22  
23 delivery in primary care. To our knowledge, this is the first study to investigate possible  
24  
25 interactions with parity with regard to the impact of anxiety on the birth process. More  
26  
27 research is necessary to unravel the factors contributing to the different effects of anxiety in  
28  
29 primiparous and multiparous women.  
30  
31  
32  
33  
34

35  
36 In contrast to our expectation, we found no stronger associations between general or  
37  
38 pregnancy-related anxiety in the non-Dutch groups compared to the Dutch group. However,  
39  
40 some indication was found for an increased risk for instrumental delivery in Turkish women  
41  
42 with high pregnancy-related anxiety. It is unlikely that this is explained by the lack of prenatal  
43  
44 healthcare visits or language barriers, because these factors are also seen among Moroccan  
45  
46 and Surinamese women.[46] However, this latter finding should be interpreted with caution  
47  
48 as the subgroup was small; we recommend more studies in large multi-ethnic cohorts to  
49  
50 address these questions. The large prevalence of high anxiety in non-Dutch women also  
51  
52 justifies this research.  
53  
54  
55  
56

1  
2  
3 Some indications were found that the odds for pain relief/sedation were especially increased  
4  
5 in anxious women who started labour in secondary care compared to primary care. This may  
6  
7 reflect that primary caregivers use different strategies to support anxious women during  
8  
9 labour.  
10

11  
12  
13 It is reassuring that we found no association between general and pregnancy-related anxiety  
14  
15 and the progression of birth, but only with interventions. Another Dutch study showed that  
16  
17 referral during labour, a significant intervention within the Dutch context, was associated with  
18  
19 a negative recall of labour three years later.[47] In 2013, the need for pain relief was the most  
20  
21 frequent reason (18.5%) for referral during labour.[48] Therefore, it is worthwhile to  
22  
23 investigate whether these interventions during labour can be managed by interventions  
24  
25 during pregnancy in anxious women, to avoid the necessity of labour-related interventions. If  
26  
27 effective interventions are identified, screening for anxiety (especially pregnancy-related  
28  
29 anxiety showing the strongest associations) should be implemented in prenatal care, at least  
30  
31 in subgroups with an increased risk for anxiety. The observed high prevalence of general and  
32  
33 pregnancy-related anxiety in non-Dutch women underlines the relevance of screening and  
34  
35 subsequent fear-reducing interventions, especially in this group.  
36  
37  
38  
39  
40  
41

## 42 **Conclusion**

43  
44  
45 General and pregnancy-related anxiety in the first trimester of pregnancy are not associated  
46  
47 with prolonged or obstructed labour and artificial delivery and, therefore, do not appear to  
48  
49 influence the progression of birth. However, high levels of anxiety contribute to greater use  
50  
51 of interventions during labour, especially pain relief/sedation, induction of labour and  
52  
53 referral during labour. Although we found similar associations between ethnic groups, the  
54  
55  
56  
57  
58  
59  
60



1  
2  
3 high prevalence of anxiety symptoms in pregnant women with a migrant background justifies  
4  
5 more research on the effect of interventions to reduce anxiety symptoms in ethnic groups.  
6  
7

#### 8 9 **ACKNOWLEDGEMENTS**

10  
11 The authors would like to thank all participants of the ABCD study. We also thank Catherine  
12  
13 Barrett for developing the first design of the study.  
14  
15

#### 16 17 **COMPETING INTERESTS**

18  
19 None declared. Completed disclosure of interests form available to view online as supporting  
20  
21 information.  
22  
23  
24

#### 25 26 **FUNDING**

27  
28 The ABCD-study was supported by the Academic Medical Centre, Amsterdam and the Public  
29  
30 Health Services, Amsterdam. The present study was not funded by external sources.  
31  
32  
33

#### 34 35 **CONTRIBUTION TO AUTHORSHIP**

36  
37 The study was designed by JMK and TGV. JMK performed the statistical analysis and drafted  
38  
39 the manuscript. TGV rendered and provided the ABCD Study data. JMK, TGV and AMS  
40  
41 interpreted the results of the analysis. TGV and AMS made substantial contributions in  
42  
43 revising the manuscript. The final manuscript was read and approved by all authors.  
44  
45  
46  
47

#### 48 49 **DETAILS OF ETHICAL APPROVAL**

50  
51 Approval for the ABCD study was obtained from the Central Committee on Research involving  
52  
53 Human Subjects in the Netherlands, the Medical Ethical Committees of participating hospitals,  
54  
55 and from the Registration Committee of Amsterdam.  
56  
57

## DATA SHARING

Data of the ABCD study can be shared for specific research questions. Please contact  
t.vrijkotte@amc.uva.nl.

## LEGENDS OF FIGURES

### Figure 1. Flowchart of the ABCD study and inclusion in the current analyses

STAI = State Trait Anxiety Inventory

PRAQ = Pregnancy-Related Anxiety Questionnaire

PRN=Dutch Perinatal Registration

## REFERENCES

1. Kwee A, Elferink-Stinkens PM, Reuwer PJ, Bruinse HW. Trends in obstetric interventions in the Dutch obstetrical care system in the periode 1993-2002. *Eur J Obstet Gynec Reprod Biol* 2007;132:70-5.
2. Dutch Perinatal Registration. Perinatal Care in the Netherlands 2013. Utrecht: Stichting Perinatale Registratie Nederland: Figure 4.1. Available from [http://www.perinatreg.nl/uploads/150/153/PRN\\_jaarboek\\_2013\\_09122014.pdf](http://www.perinatreg.nl/uploads/150/153/PRN_jaarboek_2013_09122014.pdf)
3. Brown HK, Hill J, Natale R. Caesarean section rates in Southwestern Ontario: changes over time after adjusting for important medical and social characteristics. *J Obstet Gynaecol Can* 2014;36:578-89.
4. Einarsdottir K, Haggar F, Pereira G, Leonard H, de Klerk N, Stanley FJ, Stock S. Role of public and private funding in the rising caesarean section rate: a cohort study. *BMJ Open* 2013;3:e002789.
5. Dahlen HG, Tracy S, Tracy M, Bisits A, Brown C, Thornton C. Rates of obstetric intervention among low-risk women giving birth in private and public hospitals in NSW: a population-based descriptive study. *BMJ Open* 2012;2:e001723.
6. Delbaere I, Cammu H, Martens E, Tency I, Martens G, Temmerman M. Limiting the caesarean section rate in low risk pregnancies is key to lowering the trend of increased abdominal deliveries: an observational study, *BMC Pregnancy Childbirth* 2012;12:3.
7. Schuit E, Kwee A, Westerhuis ME, van Dessel HJ, Graziosi GC, van Lith JM, Nijhuis JG, Oei SG, Oosterbaan HP, Schuitemaker NW, Wouters MG, Visser GH, Mol BW, Moons KG, Groenwold RH. A clinical prediction model to assess the risk of operative delivery. *BJOG* 2012;119:915-23.
8. Daemers DO, Wijnen HA, van Limbeek EB, Budé LM, Nieuwenhuijze MJ, Spaanderman ME, de Vries RG. The impact of obesity on outcomes of midwife-led pregnancy and childbirth in a primary care population: a prospective cohort study. *BJOG* 2014;121:1403-13.
9. Essex HN, Green J, Baston H, Pickett KE. Which women are at an increased risk of caesarean section or an instrumental vaginal birth in the UK: an exploration within the Millennium Cohort Study. *BJOG* 2013;120:732-42.

10. Sandall J, Soltani H, Gates S, Shennan A, Devane D. Midwife-led continuity models versus other models of care for childbearing women. *Cochrane Database Syst Rev*. 2013;8:CD004667.
11. Alder J, Fink N, Bitzer J, Hosli E, Holzgreve W. Depression and anxiety during pregnancy: a risk factor for obstetric, fetal and neonatal outcome? A critical review of the literature. *J Matern Fetal Neonatal Med* 2007;42:189-209.
12. Johnson R, Slade P. Obstetric complications and anxiety during pregnancy: is there a relationship? *J Psychosom Obstet Gynaecol* 2003;24:1-14.
13. Melender HL. Fears and coping strategies associated with pregnancy and childbirth in Finland. *J Midwifery Womens Health* 2002;47:256-63.
14. Graham WJ, Hundley V, McCheyne AL, Hall MH, Gurney E, Milne J. An investigation of women's involvement in the decision to deliver by caesarean section. *BJOG* 1999;106:213-220.
15. Nieminen K, Stephansson O, Ryding EL. Women's fear of childbirth and preference for caesarean section--a cross-sectional study at various stages of pregnancy in Sweden. *Acta Obstet Gynecol Scand* 2009;88:807-813.
16. Handelzalts J, Fisher S, Lurie S, Golan A and Sadan O. Personality, fear of childbirth and caesarean delivery on demand. *Acta Obstet Gynecol Scand* 2012;92:16-21.
17. Adams SS, Eberhard-Gran M, Eskild A. Fear of childbirth and duration of labour: a study of 2206 women with intended vaginal delivery. *BJOG* 2012;119:1238-46.
18. Laursen M, Johansen C, Hedegaard M. Fear of childbirth and risk for birth complications in nulliparous women in the Danish National Birth Cohort. *BJOG* 2009;116:1350-55.
19. Reck C, Zimmer K, Dubber S, Zipser B, Schlehe B, Gawlik S. The influence of general anxiety and childbirth-specific anxiety on birth outcome. *Arch Womens Ment Health* 2013;16:363-9.
20. Ryding EL, Wijma B, Wijma K, Rydhström H. Fear of childbirth during pregnancy may increase the risk of emergency caesarean section. *Acta Obstet Gynecol Scand* 1998;77:542-7.
21. Hall WA, Stoll K, Hutton EK, Brown H. A prospective study of effects of psychological factors and sleep on obstetric interventions, mode of birth, and neonatal outcomes among low-risk British Columbian women. *BMC Pregnancy Childbirth* 2012;3:78.

- 1  
2  
3 22. Sluijs AM, Cleiren MP, Scherjon SA, Wijma K. No relationship between fear of childbirth and  
4 pregnancy-/delivery-outcome in a low-risk Dutch pregnancy cohort delivering at home or in  
5 hospital. *J Psychosom Obstet Gynaecol* 2012;33:99-105.  
6  
7  
8  
9 23. Johnson R, Slade P. Does fear of childbirth during pregnancy predict emergency caesarean  
10 section? *BJOG* 2002;109:1213–1221.  
11  
12 24. Fenwick J, Gamble J, Nathan E, Bayes S, Hauck Y. Pre- and postpartum levels of childbirth fear and  
13 the relationship to birth outcomes in a cohort of Australian women. *J Clin Nurs* 2009;18:667–677.  
14  
15 25. Giscombe CL, Lobel M. Explaining disproportionately high rates of adverse birth outcomes among  
16 African Americans: the impact of stress, racism, and related factors in pregnancy. *Psychol Bull*  
17 2005;131:662-83.  
18  
19 26. Barnes VA, Treiber FA, Musante L, Turner JR, Davis H, Strong WB. Ethnicity and socioeconomic  
20 status: impact on cardiovascular activity at rest and during stress in youth with a family history of  
21 hypertension. *Ethn Dis* 2000;10:4-16.  
22  
23 27. Dysart JM, Treiber FA, Pflieger K, Davis H, Strong WB. Ethnic differences in the myocardial and  
24 vascular reactivity to stress in normotensive girls. *Am J Hypertens* 1994;7:15-22.  
25  
26 28. Hogue CJ, Bremner JD. Stress model for research into preterm delivery among black women. *Am J*  
27 *Obstet Gynecol* 2005;192(5 Suppl):S47-55.  
28  
29 29. Schrier AC, de Wit MA, Coupé VM, Fassaert T, Verhoeff AP, Kupka RW, Dekker J, Beekman AT.  
30 Comorbidity of anxiety and depressive disorders: A comparative population study in Western and  
31 non-Western inhabitants in the Netherlands. *Int J Soc Psychiatry* 2012;58:186-194.  
32  
33 30. Garret PW, Dickson HG, Young L, Whelan AK. The Happy Migrant Effect": perceptions of negative  
34 experiences of healthcare by patients with little or no English: a qualitative study across seven  
35 language groups. *Qual Saf Health Care* 2008;17:101-3.  
36  
37 31. Lindert J, von Ehrenstein OS, Priebe S, Mielck A, Brähler E. Depression and anxiety in labour  
38 migrants and refugees- A systematic review and meta-analysis. *Soc Sci Med* 2009;69:246–257.  
39  
40 32. Levecque K, Lodewyckx I, Vranken J. Depression and generalised anxiety in the general population  
41 in Belgium: A comparison between native and immigrant groups. *J Affect Disord* 2007;97:229–39.  
42  
43 33. Eijsden M van, Vrijkotte TGM, Gemke RJ, Wal MF van der. Cohort Profile: The Amsterdam Born  
44  
45  
46  
47  
48  
49  
50  
51  
52  
53  
54  
55  
56  
57  
58  
59  
60

- 1  
2  
3 Children and their Development (ABCD) Study. *Int J Epidemiol* 2011;40: 1176-1186
- 4  
5 34. Tromp M, van Eijsden M, Ravelli AC, Bonsel GJ. Anonymous non-response analysis in the ABCD  
6  
7 cohort study enabled by probabilistic record linkage. *Paediatr Perinat Epidemiol*. 2009;23:264-72.
- 8  
9 35. Ploeg HM van der, Defares PB, Spielberger CD. [Een nederlandstalige bewerking van de  
10  
11 Spielberger State-Trait Anxiety Inventory: de Zelf-Beoordelings Vragenlijst] *De Psycholoog*  
12  
13 1980;15:460-467. [Article in Dutch]
- 14  
15 36. Spielberger CD, Gorsuch RL, Lushene RE. STAI Manual for the State-Trait Anxiety Inventory. Palo  
16  
17 Alto, California (USA): Consulting Psychologists Press 1970.
- 18  
19 37. Mennes M, Stiers P, Lagae L, van den Bergh B. Long-term cognitive sequelae of antenatal  
20  
21 maternal anxiety: involvement of the orbitofrontal cortex. *Neurosci Biobehav Rev* 2006;30:1078-  
22  
23 86.
- 24  
25 38. Huizink AC, Mulder EJ, Robles de Medina PG, Visser GH, Buitelaar JK. Is pregnancy anxiety a  
26  
27 distinctive syndrome? *Early Hum Dev* 2004;79:81-91.
- 28  
29 39. Bergh BRH van den. The influence of maternal emotions during pregnancy on fetal and neonatal  
30  
31 behavior. *Pre- and Perinatal Psychology J* 1990;5:119-13
- 32  
33 40. Loomans E, van Dijk A, Vrijkotte T, van Eijsden M, Stronks K, Gemke R and van den Berg B.  
34  
35 Psychosocial stress during pregnancy is related to adverse birth outcomes: results from a large  
36  
37 multi-ethnic community-based birth cohort. *Eur J Public Health* 2013;23:485-91.
- 38  
39 41. Goossen-Baremans A. Consensusdocument beslisregels dataset PRN. Versie 0.99. Utrecht:  
40  
41 Stichting Perinatale Registratie Nederland. 2009. Available from  
42  
43 <http://www.perinatreg.nl/publicaties?noCache=602;1459936592> [Dutch]
- 44  
45 42. Wijma K, Wijma B, Zar M. Psychometric aspects of the W-DEQ: a new questionnaire for the  
46  
47 measurement of fear of childbirth. *J Psychosom Obstet Gynaecol* 1998;19:84-97.
- 48  
49 43. Amelink-Verburg MP, Rijnders ME, Buitendijk SE. A trend analysis in referrals during pregnancy  
50  
51 and labour in Dutch midwifery care 1988-2004. *BJOG* 2009;116:923-32.
- 52  
53 44. Perkin MR, Bland JM, Peacock, JL, Anderson HR. The effect of anxiety and depression during  
54  
55 pregnancy on obstetric complications. *BJOG* 1993;100:629-634.
- 56  
57  
58  
59  
60

- 1  
2  
3 45. Thomson, M., Hanley, J. Factors predisposing to difficult labour in primiparas. *Am J Obstet Gynecol*  
4 1988;158:1074-1078.  
5  
6  
7 46. Alderliesten ME, Vrijkotte TG, van der Wal MF, Bonsel GJ. Late start of antenatal care among  
8 ethnic minorities in a large cohort of pregnant women. *BJOG* 2007;114(10):1232-9.  
9  
10 47. Rijnders M, Baston H, Prins M, Schonbeck Y, vd Pal K, Green J, Buitendijk S. Perinatal factors  
11 related to negative or positive recall of birth experience, in women three years postpartum in the  
12 Netherlands. *Birth* 2008;35:107-16  
13  
14 48. Dutch Perinatal Registration. Perinatal Care in the Netherlands 2013. [Internet] Utrecht: Stichting  
15 Perinatale Registratie Nederland 2014, Table 9.3.1. Available from  
16  
17 [http://www.perinatreg.nl/uploads/150/153/PRN\\_jaarboek\\_2013\\_09122014.pdf](http://www.perinatreg.nl/uploads/150/153/PRN_jaarboek_2013_09122014.pdf) [Dutch]  
18  
19  
20  
21  
22  
23  
24  
25  
26  
27  
28  
29  
30  
31  
32  
33  
34  
35  
36  
37  
38  
39  
40  
41  
42  
43  
44  
45  
46  
47  
48  
49  
50  
51  
52  
53  
54  
55  
56  
57  
58  
59  
60

1  
2  
3  
4  
5  
6  
7  
8  
9  
10  
11  
12  
13  
14  
15  
16  
17  
18  
19  
20  
21  
22  
23  
24  
25  
26  
27  
28  
29  
30  
31  
32  
33  
34  
35  
36  
37  
38  
39  
40  
41  
42  
43  
44  
45  
46  
47  
48  
49

Figure 1. Flowchart of the ABCD study and inclusion in the current analyses

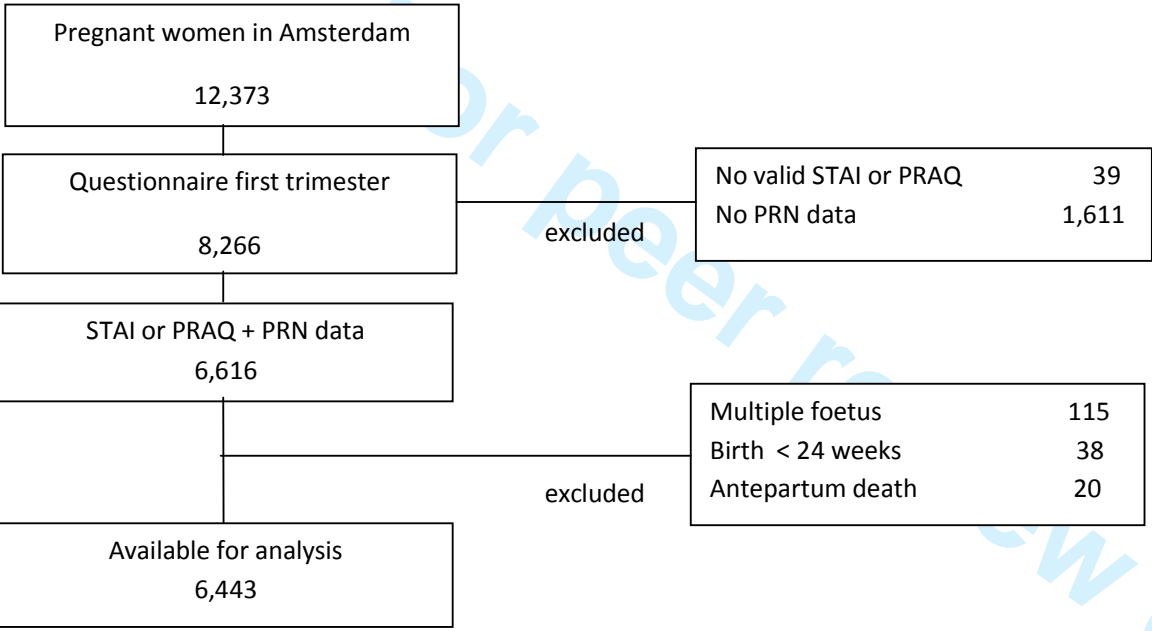

STAI = State Trait Anxiety Inventory  
 PRAQ = Pregnancy-Related Anxiety Questionnaire  
 PRN=Dutch Perinatal Registration



**Supplemental Table I. Univariate and multivariate associations between first trimester general and pregnancy related anxiety and labour process, according to care at start of labour**

| Outcome                            | General anxiety    |                     |                            |                                            | Pregnancy-related anxiety |                    |                            |                                            |
|------------------------------------|--------------------|---------------------|----------------------------|--------------------------------------------|---------------------------|--------------------|----------------------------|--------------------------------------------|
|                                    | Low<br>n=4126<br>% | High<br>n=1850<br>% | Crude model<br>OR (95% CI) | Adjusted model <sup>1</sup><br>OR (95% CI) | Low<br>n=5348<br>%        | High<br>n=662<br>% | Crude model<br>OR (95% CI) | Adjusted model <sup>1</sup><br>OR (95% CI) |
| Augmentation <sup>2</sup>          |                    |                     |                            |                                            |                           |                    |                            |                                            |
| primary care                       | 19.7               | 19.4                | 1.01 (0.85-1.22)           | 1.07 (0.87-1.31)                           | 19.4                      | 21.8               | 1.20 (0.93-1.55)           | 1.01 (0.76-1.34)                           |
| secondary care                     | 34.7               | 27.7                | 0.74 (0.61-0.89)           | 0.84 (0.68-1.04)                           | 32.4                      | 31.8               | 0.99 (0.75-1.31)           | 0.95 (0.70-1.29)                           |
| Pain relief/sedation <sup>2</sup>  |                    |                     |                            |                                            |                           |                    |                            |                                            |
| primary care                       | 10.5               | 11.3                | 1.12 (0.89-1.41)           | 1.14 (0.88-1.47)                           | 10.4                      | 13.9               | 1.47 (1.08-2.01)           | 1.23 (0.88-1.73)                           |
| secondary care                     | 22.6               | 24.6                | 1.12 (0.91-1.38)           | 1.30 (1.03-1.63)                           | 21.9                      | 33.7               | 1.87 (1.41-2.48)           | 1.81 (1.33-2.46)                           |
| Secondary caesarean <sup>2</sup>   |                    |                     |                            |                                            |                           |                    |                            |                                            |
| primary care                       | 4.9                | 4.6                 | 0.98 (0.70-1.37)           | 0.95 (0.66-1.38)                           | 4.7                       | 5.8                | 1.24 (0.78-1.97)           | 1.01 (0.62-1.65)                           |
| secondary care                     | 19.2               | 16.6                | 0.90 (0.72-1.14)           | 0.95 (0.74-1.22)                           | 17.4                      | 19.5               | 1.17 (0.84-1.63)           | 1.16 (0.81-1.64)                           |
| First stage >12 hr <sup>3</sup>    |                    |                     |                            |                                            |                           |                    |                            |                                            |
| primary care                       | 19.4               | 19.8                | 1.03 (0.85-1.25)           | 1.07 (0.86-1.34)                           | 19.2                      | 22.1               | 1.24 (0.95-1.63)           | 1.00 (0.74-1.35)                           |
| secondary care                     | 21.2               | 28.6                | 1.55 (0.65-3.68)           | 1.62 (0.56-4.73)                           | 23.6                      | 12.5               | 0.48 (0.06-4.03)           | 0.24 (0.02-3.03)                           |
| Second stage >=90 min <sup>4</sup> |                    |                     |                            |                                            |                           |                    |                            |                                            |
| primary care                       | 11.3               | 8.0                 | 0.67 (0.57-0.81)           | 0.91 (0.68-1.23)                           | 10.4                      | 10.3               | 0.93 (0.64-1.36)           | 0.96 (0.64-1.45)                           |
| secondary care                     | 10.7               | 5.8                 | 0.51 (0.35-0.75)           | 0.82 (0.54-1.24)                           | 9.3                       | 6.7                | 0.73 (0.41-1.29)           | 0.94 (0.51-1.74)                           |
| Instrumental delivery <sup>4</sup> |                    |                     |                            |                                            |                           |                    |                            |                                            |
| primary care                       | 9.7                | 8.2                 | 0.84 (0.65-1.10)           | 1.10 (0.82-1.47)                           | 9.1                       | 10.2               | 1.11 (0.77-1.61)           | 1.10 (0.73-1.63)                           |
| secondary care                     | 18.4               | 12.8                | 0.65 (0.49-0.86)           | 0.98 (0.72-1.32)                           | 16.7                      | 12.9               | 0.73 (0.47-1.12)           | 0.86 (0.54-1.36)                           |

<sup>1</sup>Adjusted for BMI, maternal age, years of education, ethnicity, smoking, alcohol, diabetes, hypertension, gestational age, birth weight <sup>2</sup>Excluded women with primary caesarean section

<sup>3</sup>Excluded women with caesarean section; data available for 3530 women (only recorded in perinatal registry of midwives) <sup>4</sup>Excluded women with caesarean section (primary/secondary)

STROBE 2007 (v4) Statement—Checklist of items that should be included in reports of cohort studies

| Section/Topic             | Item # | Recommendation                                                                                                                                                                       | Reported on page # |
|---------------------------|--------|--------------------------------------------------------------------------------------------------------------------------------------------------------------------------------------|--------------------|
| Title and abstract        | 1      | (a) Indicate the study’s design with a commonly used term in the title or the abstract                                                                                               | 1                  |
|                           |        | (b) Provide in the abstract an informative and balanced summary of what was done and what was found                                                                                  | 2-3                |
| <b>Introduction</b>       |        |                                                                                                                                                                                      |                    |
| Background/rationale      | 2      | Explain the scientific background and rationale for the investigation being reported                                                                                                 | 4-5                |
| Objectives                | 3      | State specific objectives, including any prespecified hypotheses                                                                                                                     | 5                  |
| <b>Methods</b>            |        |                                                                                                                                                                                      |                    |
| Study design              | 4      | Present key elements of study design early in the paper                                                                                                                              | 5                  |
| Setting                   | 5      | Describe the setting, locations, and relevant dates, including periods of recruitment, exposure, follow-up, and data collection                                                      | 5-6                |
| Participants              | 6      | (a) Give the eligibility criteria, and the sources and methods of selection of participants. Describe methods of follow-up                                                           | 5-6                |
|                           |        | (b) For matched studies, give matching criteria and number of exposed and unexposed                                                                                                  |                    |
| Variables                 | 7      | Clearly define all outcomes, exposures, predictors, potential confounders, and effect modifiers. Give diagnostic criteria, if applicable                                             | 6-8                |
| Data sources/ measurement | 8*     | For each variable of interest, give sources of data and details of methods of assessment (measurement). Describe comparability of assessment methods if there is more than one group | 6-8                |
| Bias                      | 9      | Describe any efforts to address potential sources of bias                                                                                                                            | 6-8                |
| Study size                | 10     | Explain how the study size was arrived at                                                                                                                                            | 6-7                |
| Quantitative variables    | 11     | Explain how quantitative variables were handled in the analyses. If applicable, describe which groupings were chosen and why                                                         | 8-9                |
| Statistical methods       | 12     | (a) Describe all statistical methods, including those used to control for confounding                                                                                                | 8-9                |
|                           |        | (b) Describe any methods used to examine subgroups and interactions                                                                                                                  | 8-9                |
|                           |        | (c) Explain how missing data were addressed                                                                                                                                          | 8-9                |
|                           |        | (d) If applicable, explain how loss to follow-up was addressed                                                                                                                       | 8-9                |
|                           |        | (e) Describe any sensitivity analyses                                                                                                                                                |                    |
| <b>Results</b>            |        |                                                                                                                                                                                      |                    |

1  
2  
3  
4  
5  
6  
7  
8  
9  
10  
11  
12  
13  
14  
15  
16  
17  
18  
19  
20  
21  
22  
23  
24  
25  
26  
27  
28  
29  
30  
31  
32  
33  
34  
35  
36  
37  
38  
39  
40  
41  
42  
43  
44  
45  
46  
47  
48  
49

|                          |     |                                                                                                                                                                                                              |               |
|--------------------------|-----|--------------------------------------------------------------------------------------------------------------------------------------------------------------------------------------------------------------|---------------|
| Participants             | 13* | (a) Report numbers of individuals at each stage of study—eg numbers potentially eligible, examined for eligibility, confirmed eligible, included in the study, completing follow-up, and analysed            | 10            |
|                          |     | (b) Give reasons for non-participation at each stage                                                                                                                                                         | 10            |
|                          |     | (c) Consider use of a flow diagram                                                                                                                                                                           | Suppl file    |
| Descriptive data         | 14* | (a) Give characteristics of study participants (eg demographic, clinical, social) and information on exposures and potential confounders                                                                     | Table 1, p 11 |
|                          |     | (b) Indicate number of participants with missing data for each variable of interest                                                                                                                          | All tables    |
|                          |     | (c) Summarise follow-up time (eg, average and total amount)                                                                                                                                                  |               |
| Outcome data             | 15* | Report numbers of outcome events or summary measures over time                                                                                                                                               | Table 2 and 3 |
| Main results             | 16  | (a) Give unadjusted estimates and, if applicable, confounder-adjusted estimates and their precision (eg, 95% confidence interval). Make clear which confounders were adjusted for and why they were included | Table 2 and 3 |
|                          |     | (b) Report category boundaries when continuous variables were categorized                                                                                                                                    |               |
|                          |     | (c) If relevant, consider translating estimates of relative risk into absolute risk for a meaningful time period                                                                                             |               |
| Other analyses           | 17  | Report other analyses done—eg analyses of subgroups and interactions, and sensitivity analyses                                                                                                               |               |
| <b>Discussion</b>        |     |                                                                                                                                                                                                              |               |
| Key results              | 18  | Summarise key results with reference to study objectives                                                                                                                                                     | 19            |
| <b>Limitations</b>       |     |                                                                                                                                                                                                              |               |
| Interpretation           | 20  | Give a cautious overall interpretation of results considering objectives, limitations, multiplicity of analyses, results from similar studies, and other relevant evidence                                   | 19-23         |
| Generalisability         | 21  | Discuss the generalisability (external validity) of the study results                                                                                                                                        | 23            |
| <b>Other information</b> |     |                                                                                                                                                                                                              |               |
| Funding                  | 22  | Give the source of funding and the role of the funders for the present study and, if applicable, for the original study on which the present article is based                                                | 24            |

\*Give information separately for cases and controls in case-control studies and, if applicable, for exposed and unexposed groups in cohort and cross-sectional studies.

**Note:** An Explanation and Elaboration article discusses each checklist item and gives methodological background and published examples of transparent reporting. The STROBE checklist is best used in conjunction with this article (freely available on the Web sites of PLoS Medicine at <http://www.plosmedicine.org/>, Annals of Internal Medicine at <http://www.annals.org/>, and Epidemiology at <http://www.epidem.com/>). Information on the STROBE Initiative is available at [www.strobe-statement.org](http://www.strobe-statement.org).

# BMJ Open

## Possible relationship between general and pregnancy-related anxiety during the first half of pregnancy and the birth process: a prospective cohort study

|                                 |                                                                                                                                                                                                                                                                                                                                                                                              |
|---------------------------------|----------------------------------------------------------------------------------------------------------------------------------------------------------------------------------------------------------------------------------------------------------------------------------------------------------------------------------------------------------------------------------------------|
| Journal:                        | <i>BMJ Open</i>                                                                                                                                                                                                                                                                                                                                                                              |
| Manuscript ID                   | bmjopen-2016-013413.R1                                                                                                                                                                                                                                                                                                                                                                       |
| Article Type:                   | Research                                                                                                                                                                                                                                                                                                                                                                                     |
| Date Submitted by the Author:   | 12-Oct-2016                                                                                                                                                                                                                                                                                                                                                                                  |
| Complete List of Authors:       | Koelewijn, Johanna; Sanquin Research and Landsteiner Laboratory, University of Amsterdam, Experimental Immunohematology; Academic Medical Center, University of Amsterdam, Obstetrics and Gynecology<br>Sluijs, Anne; Leiden University Medical Center, University of Leiden, Obstetrics and Gynecology<br>Vrijkotte, Tanja; Academic Medical Center, University of Amsterdam, Public Health |
| <b>Primary Subject Heading</b>: | Obstetrics and gynaecology                                                                                                                                                                                                                                                                                                                                                                   |
| Secondary Subject Heading:      | Mental health                                                                                                                                                                                                                                                                                                                                                                                |
| Keywords:                       | anxiety, birth process, interventions, ethnicity, parity                                                                                                                                                                                                                                                                                                                                     |
|                                 |                                                                                                                                                                                                                                                                                                                                                                                              |

SCHOLARONE™  
Manuscripts

1  
2  
3 **Possible relationship between general and pregnancy-related anxiety during the first half of**  
4  
5 **pregnancy and the birth process: a prospective cohort study**  
6

7 Corresponding author:  
8

9  
10 T.G.M. Vrijkotte<sup>1</sup>, PhD  
11

12 <sup>1</sup>Department of Public Health, Academic Medical Center, University of Amsterdam, P.O. Box 22660,  
13 1100 DD Amsterdam, the Netherlands.

14 T: +31-20-5664523  
15

16  
17 [E: t.vrijkotte@amc.uva.nl](mailto:t.vrijkotte@amc.uva.nl)  
18

19 J.M. Koelewijn<sup>1,2</sup> PhD  
20

21 <sup>1</sup>Sanquin Research and Landsteiner Laboratory, University of Amsterdam, Department Experimental  
22 Immunohematology, Plesmanlaan 125, 1066 CX Amsterdam, the Netherlands.  
23

24  
25 <sup>2</sup>Department of Obstetrics and Gynaecology, Academic Medical Center, University of Amsterdam, P.O.  
26 Box 22660, 1100 DD Amsterdam, the Netherlands.  
27

28  
29  
30 Anne-Marie Sluijs, MSc<sup>4</sup>  
31

32 <sup>4</sup>Department Obstetrics and Gynecology, Leiden University Medical Center, University of Leiden, P.O.  
33 Box 9600, 2300 RC Leiden, the Netherlands.  
34

35  
36 **Keywords:** Anxiety, Birth process, Interventions, Ethnicity, Parity  
37

38  
39 **Word count:** 3731  
40  
41  
42  
43  
44  
45  
46  
47  
48  
49  
50  
51  
52  
53  
54  
55  
56  
57  
58  
59  
60

**ABSTRACT**

**Objectives** The rate of interventions during childbirth has increased dramatically during the last decades. Maternal anxiety might play a role in the progress of the labour process and interventions during labour. This study aimed to identify associations between anxiety in the first half of pregnancy and the birth process, including any interventions required during labour. In addition, differences in the associations by parity and ethnicity were explored.

**Design** Prospective cohort study

**Setting** Primary care midwifery practices and secondary/tertiary care obstetric practices in Amsterdam, participating in the multi-ethnic ABCD study (participation rate 96%; response 8,266/12,373 (67%)).

**Participants** Included were women with singletons, alive at labour start, with a gestational age  $\geq 24$  weeks (n=6,443).

**Independent variable** General anxiety (STAI state) and pregnancy-related anxiety (PRAQ), were self-reported in the first half of pregnancy.

**Outcomes** Associations between both forms of anxiety and several indicators of the birth process were analysed. Subgroup analyses were performed for parity and ethnicity.

**Results** The prevalence of high general anxiety (STAI score  $\geq 43$ ) and pregnancy-related anxiety (PRAQ score  $\geq 90$ ) were 30.9% and 11.0%, respectively. After adjustment, both general and pregnancy-related anxiety were associated with pain relief and/or sedation (OR for general anxiety 1.27;95%-CI 1.07-1.50;OR for pregnancy-related anxiety 1.51;95%-CI 1.21-1.88). In multiparae, general anxiety was associated with induction of labour (OR 1.61;95%-CI 1.19-2.19), pregnancy-related anxiety was associated with primary caesarean section (OR

1  
2  
3 1.67;95%-CI 1.02-2.75). In nulliparae, pregnancy-related anxiety was associated with referral  
4  
5 during labour (OR 1.38; 95%-CI 1.02-1.86). Associations were largely similar for all ethnicities.  
6  
7

## 8 **Conclusions**

9  
10 High levels of general and pregnancy-related anxiety in early pregnancy contribute modestly  
11  
12 to more interventions during the birth process with similar associations between ethnic  
13  
14 groups, but with some differences between primiparae and multiparae.  
15  
16  
17  
18  
19

20 **Abbreviations:** ABCD study = Amsterdam Born Children and their Development study, BMI =  
21  
22 body mass index, PRN = Dutch Perinatal Registration, STAI = State Trait Anxiety Inventory,  
23  
24 PRAQ = Pregnancy-Related Anxiety Questionnaire  
25  
26  
27

## 28 **STRENGTH AND LIMITATIONS**

### 29 Strengths

- 30  
31  
32  
33  
34 - We performed a prospective study in a large multi-ethnic cohort.
- 35  
36  
37 - We used validated questionnaires to assess both forms of anxiety.
- 38  
39  
40  
41 - Anxiety was measured in the first half of pregnancy.
- 42  
43

### 44 Limitations

- 45  
46  
47 - The subscale for Fear of Childbirth (FOC) within the Pregnancy-Related Anxiety  
48  
49 Inventory was not suitable to measure FOC in multiparous women. Therefore, we only  
50  
51 reported the total score on pregnancy-related anxiety and not on the subscales.  
52  
53  
54  
55  
56  
57  
58  
59  
60

1  
2  
3 - Our data are collected in 2003 and 2004. Since 2004 the intervention rate has  
4  
5 increased, but there is no reason to assume that the association between anxiety and  
6  
7 (interventions in) the birth process has changed.  
8  
9  
10  
11  
12  
13  
14  
15  
16  
17  
18  
19  
20  
21  
22  
23  
24  
25  
26  
27  
28  
29  
30  
31  
32  
33  
34  
35  
36  
37  
38  
39  
40  
41  
42  
43  
44  
45  
46  
47  
48  
49  
50  
51  
52  
53  
54  
55  
56  
57  
58  
59  
60

For peer review only



## INTRODUCTION

The rate of interventions during childbirth has increased dramatically in recent decades. For example, in the Netherlands, from 1993-2002 the caesarean section rate rose from 8.1% to 13.6%. and 16.7% in 2010.[1,2] The rate of labour induction increased during 2008-2013 from 15% to 21%.[3] Although the absolute incidence of caesarean section is higher in other western countries compared to the Netherland, a similar rise in caesarean sections occurred in other western countries.[4-7]

The progression of the birth process and concomitant interventions are associated with maternal characteristics such as age, parity, body mass index (BMI), ethnicity, illness, infant birth weight, as well as with organisational factors, such as existing guidelines, the availability of 24-h pain relief, the profession of the obstetric care provider (midwife versus physician), and the level of care (primary/secondary).[8-12] Moreover, maternal anxiety might play a role in the birth process. Although one review found no overall association between anxiety and obstetric complications, specific types of anxiety (such as fear of childbirth) may be associated with specific complications and interventions, such as prolonged labour and caesarean section.[13]

Several studies have shown a relationship between fear of childbirth and duration of labour [14-16], epidural analgesia [17] and elective [18-22] and emergency caesarean. [15,23]

On the other hand, other studies reported no such relationships.[24-26] One explanation for these inconsistencies could be differences in cultural, social and organisational characteristics between countries. These factors can mediate or exacerbate the effect of anxiety on the birth process and on concomitant interventions. For example, some ethnic groups are more

1  
2  
3 susceptible to stress-induced neuroendocrine and inflammatory pathways which could lead to  
4  
5 adverse perinatal outcomes.[27-30] Also, cultural and social differences between ethnic  
6  
7 groups (e.g. language barriers, unfamiliarity with the obstetric care organisation) may explain  
8  
9 differences between ethnic groups regarding the influence of anxiety on the birth process.[31-  
10  
11 34] In addition, it is unknown whether the association between anxiety and the birth process  
12  
13 differs between nulliparous and multiparous women as well as between women giving birth  
14  
15 in primary and secondary care. To our knowledge, no study has investigated the level of care  
16  
17 and ethnicity in the association between general and pregnancy-related anxiety, and the  
18  
19 progression of birth.  
20  
21  
22  
23

24  
25 Anxiety in pregnancy is associated with shorter gestational age and has negative implications  
26  
27 for fetal neurodevelopment and child outcomes. Women with high fear of childbirth in  
28  
29 pregnancy are at risk for psychiatric problems postpartum, for example postpartum  
30  
31 depression and even posttraumatic stress syndrome (PTSS). [35-37] To lower the risk for  
32  
33 those serious consequences, appropriate treatment is desirable. If anxiety does also have a  
34  
35 detrimental effect on the birth process, there is all the more reason for screening early in  
36  
37 pregnancy for anxiety. Screening for anxiety early in pregnancy, provides sufficient time for  
38  
39 treatment or therapy for women with high anxiety levels.  
40  
41  
42  
43

44  
45 Therefore, this study investigates the association between general anxiety and/or pregnancy-  
46  
47 related anxiety measured during the first half of pregnancy and the birth process, and the  
48  
49 interaction of this association with parity, ethnicity and the level of care at the start of labour.  
50  
51

## 52 53 54 55 **METHODS**

### Study design and participants

Data were derived from the Amsterdam Born Children and their Development (ABCD) study, a large multi-ethnic prospective cohort study.[38] The ABCD study is aimed at examining the relationship between maternal lifestyle and psychosocial conditions during pregnancy and the child's health at birth as well as later in life. Between January 2003 and March 2004, participating obstetric care providers (midwives and hospital obstetricians; participation rate 96%) invited pregnant women in Amsterdam at their first antenatal visit to enroll in the ABCD. A total of 12,373 women were approached (99% of the target population). Within two weeks of this first contact, women who agreed to take part were sent a questionnaire, covering socio-demographic conditions, obstetric history and psychosocial conditions, including general and pregnancy-related anxiety. Consent forms were also sent for the linkage of study data to medical records as well as to data from the Dutch Perinatal Registration (PRN).

A total of 8266 women (response rate 67%) filled in the pregnancy questionnaire at an average of 16 weeks gestation (IQR 14-18 weeks) and 7043 gave permission for perusal of their medical records. To facilitate participation by women unable to speak Dutch, questionnaires were also available in Turkish, Arabic and English, and women could also complete the questionnaire with the assistance of an interviewer. Participation of foreign-born women was lower (42-64%) than for Dutch-born women (77%) but comparable with response rates in other population-based, multi-ethnic studies in the Netherlands.[39] In the present study we included women with a singleton pregnancy, a gestational age  $\geq 24$  weeks, and a living foetus at the start of labour.

1  
2  
3 Approval for the study was obtained from the Medical Ethical Committees of the participating  
4  
5 hospitals and the Registration Committee of the Municipality of Amsterdam. All women gave  
6  
7 written informed consent.  
8  
9

## 14 Definition and measurement of variables

### 17 *General and pregnancy-related anxiety*

20 General anxiety was assessed using the Dutch version of the State-Trait Anxiety Inventory  
21  
22 (STAI).[40-41] The 20 items regarding the state anxiety subscale were included in our  
23  
24 questionnaire, with each item scored on a 4-point scale. The anxiety score was dichotomised  
25  
26 in low-average (<43 points) and high anxiety ( $\geq 43$  points).[42] In our sample, the internal  
27  
28 consistency (Cronbach's alpha) of the scale was 0.94.  
29  
30

33 Pregnancy-related anxiety was assessed using an abbreviated 10-item version of the  
34  
35 Pregnancy-Related Anxieties Questionnaire (PRAQ).[43-44] The internal consistency  
36  
37 (Cronbach's alpha) was 0.79; each item was scored on a 4-point scale. Three aspects that can  
38  
39 be distinguished in the PRAQ are 'fear of labour', 'fear of bearing a physically or mentally  
40  
41 handicapped child' and 'concern about one's appearance'. In the present study we used the  
42  
43 total score on pregnancy-related anxiety. One question was only applicable for nulliparous  
44  
45 women ("I am scared of labour and birth because I have never experienced this"), resulting in  
46  
47 a maximum score of 40 for nulliparous women and 36 for multiparous women. Because cut-  
48  
49 off scores were not available for dichotomisation of the results from this instrument, we used  
50  
51 the 90<sup>th</sup> percentile to identify women with a high level of pregnancy-related anxiety.[45] This  
52  
53 resulted in cut-off scores of 28 and 24 for nulliparous and multiparous women, respectively.  
54  
55  
56  
57  
58  
59  
60

### *Birth process and interventions*

Outcome data on the birth process and interventions were obtained by linking our records with the PRN database. Validation of the PRN database has been described previously.[39] The outcome variables were determined from the records of the Registry of Midwives, the Registry of Obstetricians and the Registry of Paediatricians according to the decision rules of the PRN.[46]

We defined the following outcomes:

Birth process: duration of first stage of labour ( $\leq 12$  h/ $>12$  h; only available in registry of midwives), duration of second stage ( $< 1.5$  h/ $\geq 1.5$  h)].

Interventions: primary caesarean (yes/no), induction of labour (yes/no), referral during labour [only in the group that started labour under primary care; (yes/no)], augmentation (yes/no), pain relief/sedation (yes/no), secondary caesarean (yes/no), vaginal instrumental delivery [ventouse or forceps; (yes/no)]

### *Covariates*

The following covariates were included in the analyses: maternal age (years), ethnicity, education (years after primary school), pre-pregnancy BMI ( $\text{kg}/\text{m}^2$ ), parity (nulliparae/multiparae), smoking during pregnancy (yes/no), alcohol use during pregnancy (yes/no), hypertensive disorders and diabetes (pre-existent or detected during pregnancy), gestational age at delivery (weeks), care at start of labour (primary/secondary), and birth weight (g). Ethnicity was based on the birth country of the participant's mother (self-reported) and included the following categories: Dutch, Turkish, Moroccan, Black (Antillean/Aruban, Surinamese, Ghanaian or other African descent), other non-Western and

1  
2  
3 other Western countries. Pre-pregnancy weight and height, education, smoking and alcohol  
4  
5 use during pregnancy were self-reported in the questionnaire. Parity, birth weight, gestational  
6  
7 age, hypertension and diabetes were extracted from the PRN database.  
8  
9

### 10 11 12 13 14 **Statistical analysis**

15  
16  
17 Descriptive statistics were used to profile the sample characteristics according to the level of  
18  
19 maternal general anxiety and of pregnancy-related anxiety. Categorical variables were  
20  
21 described by percentages per category. Continuous variables were described using the mean  
22  
23 and 95% confidence intervals (CI), if normally distributed and, if not, with the median and  
24  
25 minimum and maximum values. Risks were presented as odds ratios (OR) and 95% CI.  
26  
27

28  
29 Differences were tested with Student's t test or Mann-Whitney U test for continuous variables  
30  
31 and Pearson's chi square test for categorical variables. Associations between high general  
32  
33 and/or pregnancy-related anxiety compared to low anxiety were analysed for each outcome  
34  
35 using multiple logistic regression analyses. All potential confounders were determined a priori  
36  
37 and added to the regression model in two steps. In the first step we adjusted for general  
38  
39 covariates: age, ethnicity, education, pre-pregnancy BMI, parity, smoking and alcohol use; in  
40  
41 the second step hypertension, diabetes, gestational age and birth weight were added to the  
42  
43 model to determine whether these pregnancy-related covariates confounded the association  
44  
45 between anxiety and each of the outcomes. Subgroup analyses were performed according to  
46  
47 parity (nulliparous versus multiparous women), ethnicity (Dutch, Turkish, Moroccan and  
48  
49 Black) and care at start of labour (primary/secondary care). No subgroup analysis was  
50  
51 performed in the ethnic groups 'other Western' and 'other non-Western' as each of these  
52  
53  
54  
55  
56  
57  
58  
59  
60

1  
2  
3 groups represented a diverse selection of ethnicities. To formally test whether different  
4  
5 associations existed for the different subgroups (parity, ethnicity, and care at start of labour)  
6  
7 between STAI or PRAQ and the birth process variables, interaction terms (between parity,  
8  
9 ethnicity respectively care at start of labour with general and pregnancy-related anxiety) were  
10  
11 added to the final model.  
12  
13

14  
15 All analyses were performed with SPSS 21.0 (IBM Statistics, USA).  
16  
17  
18  
19  
20  
21  
22  
23  
24  
25  
26  
27  
28  
29  
30  
31  
32  
33  
34  
35  
36  
37  
38  
39  
40  
41  
42  
43  
44  
45  
46  
47  
48  
49  
50  
51  
52  
53  
54  
55  
56  
57  
58  
59  
60

## RESULTS

### Response

Of the 8266 women who completed the pregnancy questionnaire, for 6616 women valid results for the STAI or PRAQ and outcome data, were available. The mean STAI-score was significantly higher in the group of women with missing outcome data (39.5 versus 38.2); the PRAQ-scores were comparable. After exclusion of 173 women (with a multiple foetus, a gestational age  $\leq$  24 weeks, or antenatal death), 6443 records were available for analysis (Figure 1). Most women completed both the STAI and the PRAQ (n=6335); 37 women completed only the STAI and 71 women only the PRAQ.

### Covariates according to anxiety levels

A high STAI score (further referred to as 'high general anxiety') was found in 30.9% of the sample and a high score on the PRAQ (further referred to as 'high pregnancy-related anxiety') in 11.1% of the sample. The STAI score was moderately correlated with the PRAQ score (Pearson's  $r=0.36$ ;  $p<0.001$ ).

High general anxiety and high pregnancy-related anxiety were more frequently observed in younger women, in women with non-Dutch ethnicities, fewer years of education, higher pre-pregnancy BMIs, smoking women, women with less alcohol consumption, and in women who gave birth to babies with a lower birth weight. There were no differences in the rates of hypertension and gestational age between the high and low anxiety groups; however, diabetes and secondary care at the start of labour were more frequently observed in women



with high general anxiety. Nulliparous women appeared to be at lower risk for high general anxiety compared to multiparous women. (Table 1)

Table 1. Maternal characteristics according to general anxiety in the first half of pregnancy and pregnancy-related anxiety

|                                        |                   | General anxiety            |                             |                          | Pregnancy-related anxiety  |                            |                          |
|----------------------------------------|-------------------|----------------------------|-----------------------------|--------------------------|----------------------------|----------------------------|--------------------------|
|                                        |                   | Low<br>n=4400 <sup>1</sup> | High<br>n=1972 <sup>1</sup> | p-<br>value <sup>2</sup> | Low<br>n=5697 <sup>1</sup> | High<br>n=709 <sup>1</sup> | p-<br>value <sup>2</sup> |
| Anxiety score                          | -median (min-max) |                            |                             |                          |                            |                            |                          |
| Nulliparae                             |                   | 33 (20-42)                 | 49 (43-80)                  |                          | 21 (10-27)                 | 30 (28-40)                 |                          |
| Multiparae                             |                   | 33 (20-42)                 | 49 (43-74)                  |                          | 18 (9-23)                  | 26 (24-36)                 |                          |
| Age (years)                            | -mean (95% CI)    | 31.5 (31.4-31.7)           | 29.7 (29.5-30.0)            | <.001                    | 31.2 (31.1-31.4)           | 28.7 (28.3-29.2)           | <.001                    |
| Ethnicity                              | -%                |                            |                             | <.001                    |                            |                            | <.001                    |
| Dutch                                  |                   | 63.5                       | 38.9                        |                          | 58.8                       | 30.1                       |                          |
| Turkish                                |                   | 2.6                        | 8.6                         |                          | 3.6                        | 12.9                       |                          |
| Moroccan                               |                   | 5.4                        | 12.1                        |                          | 6.5                        | 15.3                       |                          |
| Black                                  |                   | 6.5                        | 12.8                        |                          | 8.6                        | 8.1                        |                          |
| Other                                  |                   | 14.1                       | 13.3                        |                          | 13.7                       | 14.4                       |                          |
| Western                                |                   |                            |                             |                          |                            |                            |                          |
| Other non-Western                      |                   | 7.9                        | 14.3                        |                          | 8.9                        | 19.3                       |                          |
| Education (years)                      | -mean (95% CI)    | 9.6 (9.5-9.7)              | 7.5 (7.3-7.7)               | <.001                    | 9.2 (9.1-9.3)              | 7.1 (6.8-7.5)              | <.001                    |
| Pre-pregnancy BMI (kg/m <sup>2</sup> ) | -mean (95% CI)    | 22.8 (22.7-22.9)           | 23.8 (23.6-24.0)            | <.001                    | 23.0 (22.9-23.1)           | 23.8 (23.5-24.1)           | <.001                    |
| Nulliparae                             | -%                | 59.1                       | 49.5                        | <.001                    | <sup>3</sup>               | <sup>3</sup>               |                          |
| Smoking in pregnancy                   | -%                | 7.3                        | 15.2                        | <.001                    | 9.0                        | 15.0                       | <.001                    |
| Alcohol in pregnancy                   | -%                | 24.7                       | 16.0                        | <.001                    | 22.9                       | 15.3                       | <.001                    |
| Hypertensive disorders                 | -%                | 12.2                       | 12.5                        | .70                      | 12.1                       | 12.9                       | .54                      |
| Diabetes                               | -%                | 1.8                        | 3.1                         | .001                     | 2.1                        | 3.1                        | .08                      |
| Gestational age                        | -%                |                            |                             | .27                      |                            |                            | .87                      |
| <37 weeks                              |                   | 5.0                        | 6.0                         |                          | 5.4                        | 5.1                        |                          |
| 37-41 weeks                            |                   | 85.7                       | 84.7                        |                          | 85.4                       | 85.2                       |                          |
| >=42 weeks                             |                   | 9.3                        | 9.3                         |                          | 9.2                        | 9.7                        |                          |
| Care start labour                      | -%                |                            |                             | <.001                    |                            |                            | .29                      |
| primary care                           |                   | 60.1                       | 54.6                        |                          | 58.6                       | 56.6                       |                          |
| secondary care                         |                   | 39.9                       | 45.4                        |                          | 41.4                       | 43.4                       |                          |
| Birth weight (g)                       | -mean (95% CI)    | 3473 (3456-3490)           | 3379 (3354-3405)            | <.001                    | 3450 (3435-3465)           | 3391 (3351-3431)           | .009                     |

<sup>1</sup> Missing values were excluded (range 0-217). <sup>2</sup> Continuous variables: Student's t-test and/or Mann-Whitney U test; categorical variables Pearson's Chi square test <sup>3</sup> No comparison possible between nulliparous and multiparous women because in each group the P90 was used as cut-off for high pregnancy-related anxiety

1  
2  
3  
4  
5 **Outcome prevalences**  
6

7 The prevalences of the indicators of the birth process are shown in Table 2.  
8  
9  
10  
11  
12  
13  
14  
15  
16  
17  
18  
19  
20  
21  
22  
23  
24  
25  
26  
27  
28  
29  
30  
31  
32  
33  
34  
35  
36  
37  
38  
39  
40  
41  
42  
43  
44  
45  
46  
47  
48  
49  
50  
51  
52  
53  
54  
55  
56  
57  
58  
59  
60

For peer review only

**Table 2. Univariable and multivariable associations between general and pregnancy-related anxiety in the first half of pregnancy and (interventions in) the birth process, overall and according to parity**

| Outcome                             | General anxiety    |                     |                            |                                            | Pregnancy-related anxiety |                    |                            |                                            |
|-------------------------------------|--------------------|---------------------|----------------------------|--------------------------------------------|---------------------------|--------------------|----------------------------|--------------------------------------------|
|                                     | Low<br>n=4400<br>% | High<br>n=1972<br>% | Crude model<br>OR (95% CI) | Adjusted model <sup>1</sup><br>OR (95% CI) | Low<br>n=5697<br>%        | High<br>n=709<br>% | Crude model<br>OR (95% CI) | Adjusted model <sup>1</sup><br>OR (95% CI) |
| Primary caesarean                   | 5.5                | 5.6                 | 0.99 (0.78-1.25)           | 1.01 (0.78-1.31)                           | 5.4                       | 5.8                | 1.10 (0.78-1.55)           | 1.32 (0.92-1.89)                           |
| Nulliparae                          | 5.6                | 3.9                 | 0.68 (0.47-0.99)           | 0.79 (0.53-1.18) <sup>6</sup>              | 5.2                       | 4.3                | 0.80 (0.48-1.34)           | 1.05 (0.61-1.80)                           |
| Multiparae                          | 5.4                | 7.2                 | 1.31 (0.95-1.80)           | 1.32 (0.93-1.87) <sup>6</sup>              | 5.8                       | 8.2                | 1.54 (0.97-2.44)           | 1.67 (1.02-2.75)                           |
| Induction <sup>2</sup>              | 10.3               | 12.8                | 1.31 (1.11-1.56)           | 1.25 (1.02-1.52)                           | 10.8                      | 13.3               | 1.27 (0.99-1.61)           | 1.07 (0.81-1.42)                           |
| Nulliparae                          | 11.7               | 12.2                | 1.09 (0.86-1.38)           | 1.02 (0.78-1.35) <sup>6</sup>              | 11.8                      | 12.4               | 1.03 (0.74-1.42)           | 0.91 (0.62-1.33)                           |
| Multiparae                          | 8.2                | 13.4                | 1.74 (1.35-2.26)           | 1.61 (1.19-2.19) <sup>6</sup>              | 9.5                       | 14.7               | 1.69 (1.16-2.47)           | 1.32 (0.85-2.06)                           |
| Referral during labour <sup>3</sup> | 38.3               | 39.3                | 1.07 (0.92-1.24)           | 1.14 (0.96-1.36)                           | 37.7                      | 45.9               | 1.47 (1.18-1.83)           | 1.27 (0.99-1.62)                           |
| Nulliparae                          | 52.0               | 53.2                | 1.11 (0.91-1.36)           | 1.13 (0.91-1.41)                           | 51.7                      | 57.5               | 1.38 (1.04-1.83)           | 1.38 (1.02-1.86)                           |
| Multiparae                          | 18.8               | 23.6                | 1.33 (1.03-1.73)           | 1.18 (0.88-1.58)                           | 19.8                      | 25.9               | 1.43 (0.96-2.14)           | 1.03 (0.66-1.62)                           |
| Augmentation <sup>2</sup>           | 25.1               | 22.9                | 0.91 (0.79-1.03)           | 0.99 (0.85-1.14)                           | 24.3                      | 25.8               | 1.11 (0.92-1.34)           | 0.98 (0.80-1.21)                           |
| Nulliparae                          | 34.5               | 32.5                | 0.94 (0.80-1.11)           | 0.97 (0.81-1.15)                           | 34.4                      | 33.4               | 1.00 (0.80-1.26)           | 0.98 (0.77-1.24)                           |
| Multiparae                          | 11.7               | 13.1                | 1.18 (0.93-1.51)           | 1.05(0.81-1.36)                            | 12.1                      | 13.7               | 1.19 (0.81-1.74)           | 1.03 (0.69-1.54)                           |
| Pain relief/sedation <sup>2</sup>   | 14.9               | 16.9                | 1.18 (1.02-1.37)           | 1.27 (1.07-1.50)                           | 14.7                      | 21.8               | 1.68 (1.37-2.06)           | 1.51 (1.21-1.88)                           |
| Nulliparae                          | 21.3               | 26.6                | 1.37 (1.15-1.64)           | 1.27 (1.05-1.54)                           | 21.9                      | 30.2               | 1.63 (1.29-2.06)           | 1.50 (1.17-1.92)                           |
| Multiparae                          | 5.5                | 6.9                 | 1.28 (0.92-1.79)           | 1.27 (0.88-1.82)                           | 5.7                       | 8.6                | 1.57 (0.97-2.54)           | 1.63 (0.98-2.72)                           |
| Secondary caesarean <sup>2</sup>    | 9.7                | 9.7                 | 1.01 (0.84-1.22)           | 1.01 (0.82-1.24)                           | 9.5                       | 11.3               | 1.22 (0.94-1.59)           | 1.13 (0.85-1.49)                           |
| Nulliparae                          | 12.4               | 13.1                | 1.09 (0.87-1.37)           | 1.02 (0.80-1.31)                           | 12.3                      | 14.7               | 1.26 (0.93-1.70)           | 1.22 (0.89-1.68)                           |

1  
2  
3  
4  
5  
6  
7  
8  
9  
10  
11  
12  
13  
14  
15  
16  
17  
18  
19  
20  
21  
22  
23  
24  
25  
26  
27  
28  
29  
30  
31  
32  
33  
34  
35  
36  
37  
38  
39  
40  
41  
42  
43  
44  
45  
46  
47  
48  
49

| Outcome                            | General anxiety   |                     |                            |                                            | Pregnancy-related anxiety |                    |                            |                                            |
|------------------------------------|-------------------|---------------------|----------------------------|--------------------------------------------|---------------------------|--------------------|----------------------------|--------------------------------------------|
|                                    | Low<br>n=440<br>% | High<br>n=1972<br>% | Crude model<br>OR (95% CI) | Adjusted model <sup>1</sup><br>OR (95% CI) | Low<br>n=5697<br>%        | High<br>n=709<br>% | Crude model<br>OR (95% CI) | Adjusted model <sup>1</sup><br>OR (95% CI) |
| Multiparae                         | 5.8               | 6.2                 | 1.08 (0.77-1.53)           | 1.00 (0.69-1.47)                           | 5.9                       | 5.9                | 0.92 (0.51-1.66)           | 0.90 (0.49-1.68)                           |
| First stage >12 hr <sup>4</sup>    | 19.5              | 20.1                | 1.05 (0.87-1.26)           | 1.09 (0.88-1.35)                           | 19.4                      | 21.9               | 1.21 (0.93-1.59)           | 0.96 (0.71-1.30)                           |
| Nulliparae                         | 30.5              | 33.1                | 1.12 (0.90-1.39)           | 1.02 (0.80-1.29)                           | 31.1                      | 31.1               | 1.03 (0.76-1.40)           | 0.88 (0.64-1.22)                           |
| Multiparae                         | 3.9               | 5.8                 | 1.65 (0.99-2.74)           | 1.48 (0.86-2.56)                           | 4.4                       | 7.2                | 1.93 (0.96-3.89)           | 1.64 (0.78-3.45)                           |
| Second stage >=90 min <sup>5</sup> | 11.1              | 7.1                 | 0.60 (0.48-0.75)           | 0.88 (0.69-1.12)                           | 10.0                      | 8.9                | 0.86 (0.63-1.18)           | 0.96 (0.68-1.34)                           |
| Nulliparae                         | 18.4              | 12.6                | 0.62 (0.49-0.80)           | 0.80 (0.62-1.03) <sup>6</sup>              | 17.2                      | 14.5               | 0.79 (0.56-1.10)           | 0.95 (0.67-1.35)                           |
| Multiparae                         | 1.3               | 2.0                 | 1.53 (0.79-2.97)           | 1.86 (0.91-3.79) <sup>6</sup>              | 1.6                       | 1.3                | 0.84 (0.26-2.77)           | 0.92 (0.26-3.23)                           |
| Instrumental delivery <sup>5</sup> | 12.5              | 10.0                | 0.78 (0.64-0.94)           | 1.08 (0.87-1.33)                           | 11.8                      | 11.2               | 0.93 (0.70-1.23)           | 0.99 (0.73-1.34)                           |
| Nulliparae                         | 19.6              | 17.1                | 0.86 (0.70-1.07)           | 1.07 (0.85-1.35)                           | 19.1                      | 17.5               | 0.89 (0.66-1.20)           | 1.04 (0.75-1.43)                           |
| Multiparae                         | 3.0               | 3.3                 | 1.02 (0.63-1.66)           | 1.16 (0.69-1.95)                           | 3.2                       | 2.1                | 0.68 (0.27-1.71)           | 0.80 (0.31-2.05)                           |

<sup>1</sup>Adjusted for BMI, maternal age, years of education, ethnicity, smoking, alcohol, diabetes, hypertension, gestational age, birth weight <sup>2</sup>Excluded women with primary caesarean section. <sup>3</sup>Only women under primary care at start of labour <sup>4</sup>Excluded women with caesarean section; data available for 3533 women (only recorded in perinatal registry of midwives) <sup>5</sup>Excluded women with caesarean section (primary/ secondary) <sup>6</sup>p-value interaction parity and anxiety <.05

1  
2  
3  
4 Most prevalences were higher (p-values <0.05) in nulliparous than in multiparous women,  
5 except primary caesarean section (p=0.09). Most prevalences were similar in the different  
6 ethnicities, except for a higher prevalence of prolonged second stage of labour and  
7 instrumental delivery in the Dutch women (p<0.001).  
8

### 9 **Multivariable analyses**

10  
11 In all analyses, after adjustment for general covariates, there were no major changes in the  
12 models when, in the second step, also the pregnancy-related covariates (hypertension,  
13 diabetes, gestational age and birth weight) were added. Therefore, only the crude models and  
14 the fully adjusted models are presented.  
15  
16

#### 17 *General anxiety and parity*

18  
19 After full adjustment, women with high general anxiety were more likely to undergo induction  
20 of labour and receive pain relief/sedation. Subgroup analysis showed that the association with  
21 induction of labour was only statistically significant in multiparous women (OR 1.61; 95% CI  
22 1.19-2.19; p-value for interaction 0.025) (Table 2). Moreover, statistically significant  
23 interactions between parity and general anxiety were found for primary caesarean section (p-  
24 value 0.045) and a second stage of  $\geq 90$  min (p-value 0.011): highly anxious multiparous  
25 women were more likely to experience these two outcomes than highly anxious nulliparous  
26 women.  
27  
28

#### 29 *Pregnancy-related anxiety and parity*

30  
31 After full adjustment, women with high pregnancy-related anxiety, both nulliparous and  
32 multiparous women, were more likely to receive pain relief/sedation. Subgroup analysis  
33 showed an increased risk for referral during labour in highly anxious nulliparous women and  
34 an increased risk for primary caesarean in highly anxious multiparous women; however, no  
35 statistically significant interactions with parity were observed when formal interaction testing  
36 was completed (Table 2).  
37  
38

#### 39 *General and pregnancy-related anxiety and ethnicity*

40  
41 No statistically significant interactions were found between general or pregnancy-related  
42 anxiety with ethnicity for any of the outcome measures (all p-values  $\geq 0.12$ ). However,  
43 subgroup analyses suggested a statistically significant association between pregnancy-related  
44 anxiety and instrumental delivery in Turkish women (OR 3.47; 95% CI 1.03-11.6), which was  
45 not present in the total group (Table 3).  
46  
47  
48  
49  
50  
51  
52  
53  
54  
55  
56  
57  
58  
59  
60

**Table 3. Univariable and multivariable associations between general and pregnancy-related anxiety in the first half of pregnancy and (interventions in) the birth process, according to ethnicity**

| Outcome                                   | Anxiety prevalence |                     | General anxiety            |                                            | Pregnancy-related anxiety  |                                            |                  |
|-------------------------------------------|--------------------|---------------------|----------------------------|--------------------------------------------|----------------------------|--------------------------------------------|------------------|
|                                           | Low<br>n=3430<br>% | High<br>n=1426<br>% | Crude model<br>OR (95% CI) | Adjusted model <sup>1</sup><br>OR (95% CI) | Crude model<br>OR (95% CI) | Adjusted model <sup>1</sup><br>OR (95% CI) |                  |
| <b>Primary caesarean</b>                  |                    |                     |                            |                                            |                            |                                            |                  |
| Dutch                                     | 5.6                | 7.0                 | 1.29 (0.94-1.79)           | 1.23 (0.88-1.73)                           | 6.1                        | 1.05 (0.59-1.87)                           | 1.09 (0.60-1.96) |
| Turkish                                   | 3.4                | 3.6                 | 1.07 (0.30-3.88)           | 0.98 (0.23-4.19)                           | 3.3                        | 1.26 (0.30-5.20)                           | 1.95 (0.39-9.82) |
| Moroccan                                  | 5.2                | 2.1                 | 0.40 (0.14-1.15)           | 0.32 (0.10-1.09)                           | 3.8                        | 1.21 (0.38-3.58)                           | 1.22 (0.33-4.48) |
| Black                                     | 6.5                | 4.4                 | 0.65 (0.29-1.44)           | 0.80 (0.31-2.01)                           | 1.8                        | 0.33 (0.04-2.45)                           | 0.44 (0.05-3.60) |
| <b>Induction<sup>2</sup></b>              |                    |                     |                            |                                            |                            |                                            |                  |
| Dutch                                     | 10.1               | 13.3                | <b>1.39 (1.08-1.79)</b>    | 1.31 (0.98-1.75)                           | 12.5                       | 1.19 (0.77-1.84)                           | 0.99 (0.61-1.63) |
| Turkish                                   | 10.7               | 13.5                | 1.29 (0.60-2.74)           | 1.13 (0.46-2.77)                           | 13.8                       | 1.05 (0.47-2.31)                           | 0.97 (0.38-2.48) |
| Moroccan                                  | 9.5                | 10.3                | 1.11 (0.59-2.09)           | 0.91 (0.45-1.82)                           | 9.8                        | 0.96 (0.44-2.10)                           | 0.96 (0.42-2.21) |
| Black                                     | 8.2                | 12.2                | 1.69 (0.92-3.08)           | 1.99 (0.96-4.12)                           | 14.5                       | 1.57 (0.66-3.74)                           | 1.22 (0.41-3.58) |
| <b>Referral during labour<sup>3</sup></b> |                    |                     |                            |                                            |                            |                                            |                  |
| Dutch                                     | 36.3               | 38.5                | 1.13 (0.90-1.42)           | 1.27 (0.98-1.64)                           | 45.5                       | 1.44 (0.99-2.10)                           | 1.30 (0.86-1.96) |
| Turkish                                   | 44.9               | 34.0                | 0.63 (0.33-1.21)           | 0.59 (0.28-1.27)                           | 47.4                       | 2.13 (1.07-4.20)                           | 1.68 (0.75-3.74) |
| Moroccan                                  | 41.5               | 47.4                | 1.15 (0.72-1.86)           | 1.37 (0.80-2.34)                           | 51.6                       | 1.35 (0.75-2.42)                           | 1.21 (0.64-2.31) |
| Black                                     | 39.1               | 39.8                | 1.08 (0.65-1.79)           | 1.16 (0.65-2.08)                           | 34.3                       | 0.92 (0.42-2.00)                           | 0.93 (0.39-2.20) |
| <b>Augmentation<sup>2</sup></b>           |                    |                     |                            |                                            |                            |                                            |                  |
| Dutch                                     | 24.2               | 22.4                | 0.91 (0.75-1.11)           | 0.95 (0.77-1.18)                           | 28.6                       | 1.31 (0.95-1.81)                           | 1.09 (0.78-1.53) |
| Turkish                                   | 21.4               | 22.2                | 1.09 (0.61-1.96)           | 1.17 (0.62-2.22)                           | 25.3                       | 1.31 (0.70-2.43)                           | 1.23 (0.62-2.43) |
| Moroccan                                  | 24.1               | 23.3                | 0.96 (0.62-1.49)           | 1.18 (0.73-1.92)                           | 24.3                       | 0.97 (0.57-1.66)                           | 0.95 (0.53-1.69) |
| Black                                     | 22.6               | 21.0                | 0.95 (0.61-1.47)           | 1.04 (0.65-1.66)                           | 20.8                       | 1.01 (0.49-2.06)                           | 0.96 (0.45-2.04) |
| <b>Pain relief/ sedation<sup>2</sup></b>  |                    |                     |                            |                                            |                            |                                            |                  |
| Dutch                                     | 13.8               | 17.7                | 1.35 (1.08-1.69)           | 1.31 (1.03-1.67)                           | 25.1                       | 2.08 (1.48-2.92)                           | 1.69 (1.18-2.41) |
| Turkish                                   | 15.2               | 14.8                | 1.01 (0.51-1.98)           | 0.99 (0.45-2.17)                           | 19.5                       | 1.67 (0.83-3.34)                           | 1.90 (0.84-4.27) |
| Moroccan                                  | 12.7               | 16.4                | 1.36 (0.80-2.33)           | 1.74 (0.96-3.13)                           | 18.6                       | 1.71 (0.94-3.11)                           | 1.67 (0.87-3.23) |
| Black                                     | 15.1               | 13.7                | 0.91 (0.55-1.52)           | 0.98 (0.55-1.76)                           | 22.6                       | 2.02 (0.99-4.12)                           | 2.05 (0.90-4.66) |
| <b>Secondary caesarean<sup>2</sup></b>    |                    |                     |                            |                                            |                            |                                            |                  |
| Dutch                                     | 8.6                | 10.1                | 1.19 (0.90-1.59)           | 1.17 (0.87-1.57)                           | 12.1                       | 1.37 (0.87-2.16)                           | 1.21 (0.76-1.92) |
| Turkish                                   | 6.3                | 9.3                 | 1.47 (0.57-3.77)           | 1.44 (0.51-4.07)                           | 8.0                        | 1.32 (0.50-3.44)                           | 1.35 (0.47-3.82) |
| Moroccan                                  | 10.0               | 7.8                 | 0.71 (0.37-1.38)           | 0.80 (0.43-1.48)                           | 8.8                        | 0.91 (0.40-2.07)                           | 0.92 (0.38-2.19) |
| Black                                     | 15.1               | 10.3                | 0.67 (0.38-1.16)           | 0.80 (0.43-1.48)                           | 15.1                       | 1.44 (0.64-3.25)                           | 1.68 (0.67-4.19) |

| Outcome                            | General anxiety    |                     |                            |                                            | Pregnancy-related anxiety |                    |                                            |                            |
|------------------------------------|--------------------|---------------------|----------------------------|--------------------------------------------|---------------------------|--------------------|--------------------------------------------|----------------------------|
|                                    | Low<br>n=3430<br>% | High<br>n=1426<br>% | Crude model<br>OR (95% CI) | Adjusted model <sup>1</sup><br>OR (95% CI) | Low<br>n=4404<br>%        | High<br>n=469<br>% | Adjusted model <sup>1</sup><br>OR (95% CI) | Crude model<br>OR (95% CI) |
| First stage >12 hr <sup>4</sup>    |                    |                     |                            |                                            |                           |                    |                                            |                            |
| Dutch                              | 17.9               | 19.1                | 1.09 (0.82-1.44)           | 1.16 (0.86-1.58)                           | 18.1                      | 19.1               | 1.09 (0.67-1.78)                           | 0.92 (0.55-1.54)           |
| Turkish                            | 14.5               | 19.1                | 1.47 (0.63-3.43)           | 1.15 (0.41-3.23)                           | 17.5                      | 16.7               | 1.02 (0.42-2.44)                           | 0.52 (0.17-1.60)           |
| Moroccan                           | 21.8               | 19.0                | 0.86 (0.48-1.57)           | 0.98 (0.49-1.94)                           | 20.1                      | 21.0               | 1.11 (0.54-2.28)                           | 0.91 (0.41-2.02)           |
| Black                              | 20.2               | 22.0                | 1.16 (0.59-2.29)           | 1.35 (0.61-2.95)                           | 21.3                      | 17.2               | 0.82 (0.29-2.31)                           | 0.98 (0.31-3.10)           |
| Second stage >=90 min <sup>5</sup> |                    |                     |                            |                                            |                           |                    |                                            |                            |
| Dutch                              | 12.6               | 8.9                 | 0.68 (0.50-0.92)           | 0.81 (0.59-1.12)                           | 11.7                      | 13.0               | 1.12 (0.70-1.77)                           | 1.02 (0.63-1.65)           |
| Turkish                            | 4.9                | 5.6                 | 1.17 (0.37-3.70)           | 1.14 (0.34-3.86)                           | 3.4                       | 10.3               | 3.04 (0.98-9.39)                           | 2.72 (0.81-9.15)           |
| Moroccan                           | 7.7                | 4.8                 | 0.47 (0.19-1.17)           | 0.59 (0.23-1.54)                           | 6.3                       | 6.5                | 0.95 (0.34-2.63)                           | 0.95 (0.33-2.80)           |
| Black                              | 2.9                | 3.6                 | 1.26 (0.42-3.81)           | 1.46 (0.44-4.78)                           | 3.3                       | 2.4                | 0.75 (0.10-5.91)                           | 0.76 (0.09-6.53)           |
| Instrumental delivery <sup>5</sup> |                    |                     |                            |                                            |                           |                    |                                            |                            |
| Dutch                              | 13.6               | 12.0                | 0.88 (0.67-1.14)           | 0.99 (0.74-1.32)                           | 13.3                      | 12.6               | 0.93 (0.59-1.47)                           | 0.79 (0.49-1.28)           |
| Turkish                            | 6.7                | 5.4                 | 0.83 (0.29-2.36)           | 0.83 (0.27-2.56)                           | 3.9                       | 11.3               | 3.02 (1.05-8.69)                           | 3.47 (1.03-11.6)           |
| Moroccan                           | 5.1                | 9.3                 | 1.62 (0.72-3.63)           | 2.11 (0.89-4.98)                           | 6.5                       | 8.6                | 1.29 (0.52-3.17)                           | 1.26 (0.49-3.24)           |
| Black                              | 5.1                | 4.3                 | 0.85 (0.34-2.09)           | 1.15 (0.43-3.07)                           | 4.7                       | 4.4                | 1.00 (0.22-4.47)                           | 1.26 (0.25-6.42)           |

<sup>1</sup>Adjusted for BMI, maternal age, years of education, ethnicity, smoking, alcohol, diabetes, hypertension, gestational age, birth weight <sup>2</sup>Excluded women with primary caesarean section. <sup>3</sup>Only women under primary care at start of labour <sup>4</sup>Excluded women with caesarean section; data available for 3530 women (only recorded in perinatal registry of midwives) <sup>5</sup>Excluded women with caesarean section (primary/ secondary)

1  
2  
3  
4  
5  
6 *General and pregnancy-related anxiety and level of care*  
7  
8

9 No statistically significant interactions were found between general or pregnancy-related  
10 anxiety with the level at care at the start of labour for any of the outcome measures (all p-  
11 values  $\geq 0.07$ ). However, in the subgroup analyses, the risk for pain relief/sedation showed a  
12 greater increase in highly anxious women who started labour in secondary care (general  
13 anxiety: OR 1.30; 95% CI 1.03-1.63; pregnancy-related anxiety: OR 1.88; 95% CI 1.33-2.46)  
14 compared to those who began labour in primary care (general anxiety: OR 1.14; 95% CI 0.88-  
15 1.47; pregnancy-related anxiety: OR 1.23; 95% CI 0.88-1.73); however, the interactions were  
16 not statistically significant (p-values 0.34 and 0.17, respectively) (Supplemental Table 1).  
17  
18  
19  
20  
21  
22  
23  
24  
25  
26  
27  
28  
29  
30  
31  
32  
33  
34  
35  
36  
37  
38  
39  
40  
41  
42  
43  
44  
45  
46  
47  
48  
49  
50  
51  
52  
53  
54  
55  
56  
57  
58  
59  
60



## DISCUSSION

### Main findings

In this multi-ethnic cohort, general anxiety and pregnancy-related anxiety, as measured in the first half of pregnancy, were not associated with the progress of the birth process, but were associated with an increased risk for interventions during labour. Pregnancy-related anxiety showed stronger associations than general anxiety. Some associations differed between primiparae and multiparae, whereas similar associations were found across all ethnic groups.

### Strengths and limitations

A major strength of the present study is the prospective design in a large multi-ethnic cohort. Although the participation of non-Dutch women was lower than that of Dutch women, we collected data for  $\geq 2800$  non-Dutch women, making it possible to perform subgroup analyses in the four major ethnic groups in the Netherlands. However, the sample sizes were not large enough to prove a potential interaction effect of ethnicity and anxiety with less frequent outcomes. Although our sample might not be representative for all pregnant women in Amsterdam or in the Netherlands, there is no reason to assume that the association between anxiety and the birth process should be different in non-responders or in women with missing outcome data.

Another strength is the assessment of both general anxiety and pregnancy-related anxiety, using validated questionnaires, while most other studies only assessed pregnancy-related anxiety.

1  
2  
3 A limitation of the abbreviated 10-item version of the PRAQ that we used, is that this  
4  
5 questionnaire has only been validated in nulliparous women. Because one item of the 3-item  
6  
7 subscale 'fear of labour' was not applicable for multiparae, the assessment of this aspect in  
8  
9 multiparae was limited. Therefore, we only used the total PRAQ score and could not  
10  
11 distinguish between the different aspects of pregnancy-related anxiety. This is in agreement  
12  
13 with other questionnaires, such as the Wijma Delivery Expectancy Questionnaire (W-DEQ; a  
14  
15 frequently used questionnaire) conceptualized as a uni-dimensional instrument to measure  
16  
17 fear of childbirth.[47] Outcome data on the birth process and interventions were available  
18  
19 from the PRN. A possible limitation of this might be that not all outcome data were  
20  
21 completely registered. However, the amount of missing data within the group with outcome  
22  
23 data available was limited and there is no reason to assume that data were missing in a  
24  
25 selective manner. Since the collection of our data in 2003-2004, the prevalence of  
26  
27 interventions during labour has increased.[1-3, 48] Nevertheless, we think that the  
28  
29 associations between anxiety and the birth process have remained similar.  
30  
31  
32  
33  
34

35  
36 Anxiety was measured in the first half of pregnancy, while other studies measured anxiety  
37  
38 later in pregnancy.[16] Little evidence is available concerning how anxiety in the first half of  
39  
40 pregnancy persists and evolves during pregnancy, but in case of fear of childbirth it is likely  
41  
42 that fear will increase during pregnancy, because the event that is feared is unavoidable and  
43  
44 slowly coming closer. Moreover, assessment of anxiety in the first half of pregnancy provides  
45  
46 the opportunity to perform an intervention to reduce anxiety, particularly pregnancy-related  
47  
48 anxiety.  
49  
50  
51  
52  
53  
54  
55  
56  
57  
58  
59  
60

### Comparison with other studies

The prevalence of high general anxiety was higher in our study than in other Dutch studies.

[49,50] This can be explained by the large proportion of women of non-Dutch origine in our study.

Some studies found no association between general anxiety and (interventions in) the birth process [16,51] whereas Adams et al. were the only group to find a trend for increased risk for labour induction in general anxious women in a cohort of 2206 women.[14] To our knowledge, our study is the first to show a statistically significant association between general anxiety and interventions during birth. The difference between our study and others might be explained by a lack of power in other studies (including 88 and 1515 women, respectively), as well as by different views on the management of labour, e.g. the use of pain relief. Moreover, the other studies did not investigate the association between anxiety and labour induction, as this is not considered to be an 'undesirable' outcome.

Our observed association between pregnancy-related anxiety and pain relief/sedation is in line with other studies reporting an association between fear of labour and epidural analgesia.[17, 52] Several studies found an association between fear of labour and elective caesarean section.[18-21] Unfortunately, in our data elective caesarean was not coded, but only primary caesarean. Although we found no association between general or pregnancy-related anxiety and primary caesarean, an interaction was seen between parity and general anxiety, suggesting a decreased risk for primary caesarean in anxious nulliparae and an increased risk for anxious multiparae. This might reflect the restraint of obstetricians in the

1  
2  
3 Netherlands to perform an elective caesarean in nulliparae. In anxious multiparae with a  
4  
5 complicated birth history, obstetric caregivers will be more willing to perform a caesarean  
6  
7 section. Although others reported an association between fear of labour and emergency  
8  
9 caesarean section this was not seen in our study.[15, 23]  
10

11  
12  
13 Several studies found a longer duration of labour in women with high fear of labour.[14-16]  
14

15 We did not find such an association; unfortunately, however, in our study data on the  
16  
17 duration of the first stage of labour were only available in categories of six hours. Since we  
18  
19 also did not find an association with augmentation during labour or artificial delivery, we think  
20  
21 that an association with the process of birth in our population is very unlikely.  
22  
23

24  
25  
26 Subgroup analyses showed some different effects in nulliparae and multiparae. Parity is  
27  
28 known to be associated with the birth process, which was confirmed in the present study.[8,  
29  
30 10-11] The different effect of anxiety on interventions in the birth process in nulliparae and  
31  
32 multiparae can be explained by physiological factors, by the woman's experience during  
33  
34 the previous labour, resulting in more anxiety in women with a complicated previous labour,  
35  
36 and also by the information available for the care provider on the previous birth process. The  
37  
38 increased risk for induction of labour in multiparae with high general anxiety may be due to  
39  
40 greater confidence by obstetric caregivers that the induction will be successful in multiparae.  
41  
42 [53,54] An increased risk for referral during labour was only seen in nulliparous women with  
43  
44 high pregnancy-related anxiety. This can be explained by the lower a priori risk for referral in  
45  
46 multiparae and the subsequent greater confidence of primary care midwives in a successful  
47  
48 delivery in primary care. To our knowledge, this is the first study to investigate possible  
49  
50 interactions with parity with regard to the impact of anxiety on the birth process. More  
51  
52  
53  
54  
55  
56  
57  
58  
59  
60

1  
2  
3 research is necessary to unravel the factors contributing to the different effects of anxiety in  
4  
5 primiparous and multiparous women.  
6

7  
8 In contrast to our expectation, we found no stronger associations between general or  
9  
10 pregnancy-related anxiety in the non-Dutch groups compared to the Dutch group. However,  
11  
12 some indication was found for an increased risk for instrumental delivery in Turkish women  
13  
14 with high pregnancy-related anxiety. It is unlikely that this is explained by the lack of prenatal  
15  
16 healthcare visits or language barriers, because these factors are also seen among Moroccan  
17  
18 and Surinamese women.[55] However, this latter finding should be interpreted with caution  
19  
20 as the subgroup was small; we recommend more studies in large multi-ethnic cohorts to  
21  
22 address these questions. The large prevalence of high anxiety in non-Dutch women also  
23  
24 justifies this research.  
25  
26  
27  
28

29  
30 Some indications were found that the odds for pain relief/sedation were especially increased  
31  
32 in anxious women who started labour in secondary care compared to primary care. This may  
33  
34 reflect that primary caregivers use different strategies to support anxious women during  
35  
36 labour.  
37  
38

39  
40 It is reassuring that we found no association between general and pregnancy-related anxiety  
41  
42 and the progression of birth, but only with interventions. Another Dutch study showed that  
43  
44 referral during labour, a significant intervention within the Dutch context, was associated with  
45  
46 a negative recall of labour three years later.[56] In 2013, the need for pain relief was the most  
47  
48 frequent reason (18.5%) for referral during labour.[57] Therefore, it is worthwhile to  
49  
50 investigate whether these interventions during labour can be managed by treatment or  
51  
52 therapy during pregnancy in anxious women, to avoid the necessity of labour-related  
53  
54 interventions. If effective treatments are identified, screening for anxiety (especially  
55  
56  
57  
58  
59  
60

1  
2  
3 pregnancy-related anxiety showing the strongest associations) should be implemented in  
4  
5 prenatal care, at least in subgroups with an increased risk for anxiety. The observed high  
6  
7 prevalence of general and pregnancy-related anxiety in non-Dutch women underlines the  
8  
9 relevance of screening and subsequent fear-reducing interventions, especially in this group.  
10  
11

## 12 13 **Conclusion**

14  
15  
16 General and pregnancy-related anxiety in the first half of pregnancy are not associated with  
17  
18 prolonged or obstructed labour and artificial delivery and, therefore, do not appear to  
19  
20 influence the progression of birth. However, high levels of anxiety contribute to greater use  
21  
22 of interventions during labour, especially pain relief/sedation, induction of labour and  
23  
24 referral during labour. Although we found similar associations between ethnic groups, the  
25  
26 high prevalence of anxiety symptoms in pregnant women with a migrant background justifies  
27  
28 more research on the effect of interventions to reduce anxiety symptoms in ethnic groups.  
29  
30  
31  
32  
33

## 34 **ACKNOWLEDGEMENTS**

35  
36  
37 The authors would like to thank all participants of the ABCD study. We also thank Catherine  
38  
39 Barrett for developing the first design of the study.  
40  
41

## 42 **COMPETING INTERESTS**

43  
44  
45 None declared. Completed disclosure of interests form available to view online as supporting  
46  
47 information.  
48  
49

## 50 **FUNDING**

1  
2  
3 The ABCD-study was supported by the Academic Medical Centre, Amsterdam and the Public  
4  
5 Health Services, Amsterdam. The present study was not funded by external sources.  
6  
7

#### 8 9 **CONTRIBUTION TO AUTHORSHIP**

10  
11 The study was designed by JMK and TGV. JMK performed the statistical analysis and drafted  
12  
13 the manuscript. TGV rendered and provided the ABCD Study data. JMK, TGV and AMS  
14  
15 interpreted the results of the analysis. TGV and AMS made substantial contributions in  
16  
17 revising the manuscript. The final manuscript was read and approved by all authors.  
18  
19

#### 20 21 22 **DETAILS OF ETHICAL APPROVAL**

23  
24 Approval for the ABCD study was obtained from the Central Committee on Research involving  
25  
26 Human Subjects in the Netherlands, the Medical Ethical Committees of participating hospitals,  
27  
28 and from the Registration Committee of Amsterdam.  
29  
30  
31

#### 32 33 34 35 36 **DATA SHARING**

37  
38  
39 Data of the ABCD study can be shared for specific research questions. Please contact  
40  
41 t.vrijkotte@amc.uva.nl.  
42  
43  
44  
45  
46  
47

#### 48 49 **LEGENDS OF FIGURES**

50  
51 **Figure 1. Flowchart of the ABCD study and inclusion in the current analyses**

52  
53 STAI = State Trait Anxiety Inventory

54  
55 PRAQ = Pregnancy-Related Anxiety Questionnaire

56  
57 PRN=Dutch Perinatal Registration  
58

1  
2  
3  
4  
5  
6  
7  
8  
9  
10  
11  
12  
13  
14  
15  
16  
17  
18  
19  
20  
21  
22  
23  
24  
25  
26  
27  
28  
29  
30  
31  
32  
33  
34  
35  
36  
37  
38  
39  
40  
41  
42  
43  
44  
45  
46  
47  
48  
49  
50  
51  
52  
53  
54  
55  
56  
57  
58  
59  
60

For peer review only



## REFERENCES

1. Kwee A, Elferink-Stinkens PM, Reuwer PJ, Bruinse HW. Trends in obstetric interventions in the Dutch obstetrical care system in the periode 1993-2002. *Eur J Obstet Gynec Reprod Biol* 2007;132:70-5.
2. Zhao Y, Zhang J, Hukkelhoven C, Offerhaus P, Zwart J, Jonge A de, Geerts C. Modest rise in caesarean section from 2000-2010: The Dutch experience. *Plos One* 2016;11(5):e0155565.
3. Dutch Perinatal Registration. Perinatal Care in the Netherlands 2013. Utrecht: Stichting Perinatale Registratie Nederland: Figure 4.1. Available from [http://www.perinatreg.nl/uploads/150/153/PRN\\_jaarboek\\_2013\\_09122014.pdf](http://www.perinatreg.nl/uploads/150/153/PRN_jaarboek_2013_09122014.pdf)
4. Brown HK, Hill J, Natale R. Caesarean section rates in Southwestern Ontario: changes over time after adjusting for important medical and social characteristics. *J Obstet Gynaecol Can* 2014;36:578-89.
5. Einarsdottir K, Haggard F, Pereira G, Leonard H, de Klerk N, Stanley FJ, Stock S. Role of public and private funding in the rising caesarean section rate: a cohort study. *BMJ Open* 2013;3:e002789.
6. Dahlen HG, Tracy S, Tracy M, Bisits A, Brown C, Thornton C. Rates of obstetric intervention among low-risk women giving birth in private and public hospitals in NSW: a population-based descriptive study. *BMJ Open* 2012;2:e001723.
7. Delbaere I, Cammu H, Martens E, Tency I, Martens G, Temmerman M. Limiting the caesarean section rate in low risk pregnancies is key to lowering the trend of increased abdominal deliveries: an observational study, *BMC Pregnancy Childbirth* 2012;12:3.
8. Schuit E, Kwee A, Westerhuis ME, van Dessel HJ, Graziosi GC, van Lith JM, Nijhuis JG, Oei SG, Oosterbaan HP, Schuitemaker NW, Wouters MG, Visser GH, Mol BW, Moons KG, Groenwold RH. A clinical prediction model to assess the risk of operative delivery. *BJOG* 2012;119:915-23.
9. Daemers DO, Wijnen HA, van Limbeek EB, Budé LM, Nieuwenhuijze MJ, Spaanderman ME, de Vries RG. The impact of obesity on outcomes of midwife-led pregnancy and childbirth in a primary care population: a prospective cohort study. *BJOG* 2014;121:1403-13.

10. Essex HN, Green J, Baston H, Pickett KE. Which women are at an increased risk of caesarean section or an instrumental vaginal birth in the UK: an exploration within the Millennium Cohort Study. *BJOG* 2013;120:732-42.
11. Sandall J, Soltani H, Gates S, Shennan A, Devane D. Midwife-led continuity models versus other models of care for childbearing women. *Cochrane Database Syst Rev.* 2013;8:CD004667.
12. Alder J, Fink N, Bitzer J, Hosli E, Holzgreve W. Depression and anxiety during pregnancy: a risk factor for obstetric, fetal and neonatal outcome? A critical review of the literature. *J Matern Fetal Neonatal Med* 2007;42:189-209.
13. Johnson R, Slade P. Obstetric complications and anxiety during pregnancy: is there a relationship? *J Psychosom Obstet Gynaecol* 2003;24:1-14.
14. Adams SS, Eberhard-Gran M, Eskild A. Fear of childbirth and duration of labour: a study of 2206 women with intended vaginal delivery. *BJOG* 2012;119:1238-46.
15. Laursen M, Johansen C, Hedegaard M. Fear of childbirth and risk for birth complications in nulliparous women in the Danish National Birth Cohort. *BJOG* 2009;116:1350-55.
16. Reck C, Zimmer K, Dubber S, Zipser B, Schlehe B, Gawlik S. The influence of general anxiety and childbirth-specific anxiety on birth outcome. *Arch Womens Ment Health* 2013;16:363-9.
17. Hall WA, Stoll K, Hutton EK, Brown H. A prospective study of effects of psychological factors and sleep on obstetric interventions, mode of birth, and neonatal outcomes among low-risk British Columbian women. *BMC Pregnancy Childbirth* 2012;3:78.
18. Melender HL. Fears and coping strategies associated with pregnancy and childbirth in Finland. *J Midwifery Womens Health* 2002;47:256-63.
19. Graham WJ, Hundley V, McCheyne AL, Hall MH, Gurney E, Milne J. An investigation of women's involvement in the decision to deliver by caesarean section. *BJOG* 1999;106:213-220.
20. Nieminen K, Stephansson O, Ryding EL. Women's fear of childbirth and preference for caesarean section--a cross-sectional study at various stages of pregnancy in Sweden. *Acta Obstet Gynecol Scand* 2009;88:807-813.
21. Handelzalts J, Fisher S, Lurie S, Golan A and Sadan O. Personality, fear of childbirth and caesarean delivery on demand. *Acta Obstet Gynecol Scand* 2012;92:16-21.

- 1  
2  
3 22. Ryding EL, Lukasse M, van Parys AS, Wangel AM, Karro H, Kristjansdottir H, Schroll AM, Schei B,  
4 Bidens Group. Fear of Childbirth and Risk of Cesarean Delivery: A cohort study in six European  
5 Countries. *Birth*. 2015;42:48-55.  
6  
7  
8  
9 23. Ryding EL, Wijma B, Wijma K, Rydhström H. Fear of childbirth during pregnancy may increase the  
10 risk of emergency caesarean section. *Acta Obstet Gynecol Scand* 1998;77:542-7.  
11  
12 24. Sluijs AM, Cleiren MP, Scherjon SA, Wijma K. No relationship between fear of childbirth and  
13 pregnancy-/delivery-outcome in a low-risk Dutch pregnancy cohort delivering at home or in  
14 hospital. *J Psychosom Obstet Gynaecol* 2012;33:99-105.  
15  
16  
17 25. Johnson R, Slade P. Does fear of childbirth during pregnancy predict emergency caesarean  
18 section? *BJOG* 2002;109:1213-1221.  
19  
20  
21 26. Fenwick J, Gamble J, Nathan E, Bayes S, Hauck Y. Pre- and postpartum levels of childbirth fear and  
22 the relationship to birth outcomes in a cohort of Australian women. *J Clin Nurs* 2009;18:667-677.  
23  
24 27. Giscombe CL, Lobel M. Explaining disproportionately high rates of adverse birth outcomes among  
25 African Americans: the impact of stress, racism, and related factors in pregnancy. *Psychol Bull*  
26 2005;131:662-83.  
27  
28 28. Barnes VA, Treiber FA, Musante L, Turner JR, Davis H, Strong WB. Ethnicity and socioeconomic  
29 status: impact on cardiovascular activity at rest and during stress in youth with a family history of  
30 hypertension. *Ethn Dis* 2000;10:4-16.  
31  
32 29. Dysart JM, Treiber FA, Pflieger K, Davis H, Strong WB. Ethnic differences in the myocardial and  
33 vascular reactivity to stress in normotensive girls. *Am J Hypertens* 1994;7:15-22.  
34  
35 30. Hogue CJ, Bremner JD. Stress model for research into preterm delivery among black women. *Am J*  
36 *Obstet Gynecol* 2005;192(5 Suppl):S47-55.  
37  
38 31. Schrier AC, de Wit MA, Coupé VM, Fassaert T, Verhoeff AP, Kupka RW, Dekker J, Beekman AT.  
39 Comorbidity of anxiety and depressive disorders: A comparative population study in Western and  
40 non-Western inhabitants in the Netherlands. *Int J Soc Psychiatry* 2012;58:186-194.  
41  
42 32. Garret PW, Dickson HG, Young L, Whelan AK. The Happy Migrant Effect": perceptions of negative  
43 experiences of healthcare by patients with little or no English: a qualitative study across seven  
44 language groups. *Qual Saf Health Care* 2008;17:101-3.  
45  
46  
47  
48  
49  
50  
51  
52  
53  
54  
55  
56  
57  
58  
59  
60

- 1  
2  
3 33. Lindert J, von Ehrenstein OS, Priebe S, Mielck A, Brähler E. Depression and anxiety in labour  
4 migrants and refugees- A systematic review and meta-analysis. *Soc Sci Med* 2009;69:246–257.  
5  
6  
7 34. Levecque K, Lodewyckx I, Vranken J. Depression and generalised anxiety in the general population  
8 in Belgium: A comparison between native and immigrant groups. *J Affect Disord* 2007;97:229–39.  
9  
10 35. Dunkel Schetter C and Tanner L. Anxiety, depression and stress in pregnancy: Implications for  
11 mothers, children, research and practice. *Curr.. Opin. Psychiatry* 2012;25:141-148  
12  
13 36. Glynn LM, Schetter CD, Hobel CJ, Sandman CA. *Health Psychology* 2008;27:43-51.  
14  
15 37. VandenBergh BR, Mulder EJ, Mennes M, Glover V. Antenatal maternal anxiety and stress and the  
16 neurobehavioural development of the fetus and child: links and possible mechanisms. A review.  
17 *Neurosci Biobehav. Rev* 2005;29:237-58.  
18  
19 38. Eijsden M van, Vrijkotte TGM, Gemke RJ, Wal MF van der. Cohort Profile: The Amsterdam Born  
20 Children and their Development (ABCD) Study. *Int J Epidemiol* 2011;40: 1176-1186  
21  
22 39. Tromp M, van Eijsden M, Ravelli AC, Bonsel GJ. Anonymous non-response analysis in the ABCD  
23 cohort study enabled by probabilistic record linkage. *Paediatr Perinat Epidemiol.* 2009;23:264-72.  
24  
25 40. Ploeg HM van der, Defares PB, Spielberger CD. [Een nederlandstalige bewerking van de  
26 Spielberger State-Trait Anxiety Inventory: de Zelf-Beoordelings Vragenlijst] *De Psycholoog*  
27 1980;15:460–467. [Article in Dutch]  
28  
29 41. Spielberger CD, Gorsuch RL, Lushene RE. STAI Manual for the State-Trait Anxiety Inventory. Palo  
30 Alto, California (USA): Consulting Psychologists Press 1970.  
31  
32 42. Mennes M, Stiers P, Lagae L, van den Bergh B. Long-term cognitive sequelae of antenatal  
33 maternal anxiety: involvement of the orbitofrontal cortex. *Neurosci Biobehav Rev* 2006;30:1078-  
34 86.  
35  
36 43. Huizink AC, Mulder EJ, Robles de Medina PG, Visser GH, Buitelaar JK. Is pregnancy anxiety a  
37 distinctive syndrome? *Early Hum Dev* 2004;79:81–91.  
38  
39 44. Bergh BRH van den. The influence of maternal emotions during pregnancy on fetal and neonatal  
40 behavior. *Pre- and Perinatal Psychology J* 1990;5:119–13  
41  
42 45. Loomans E, van Dijk A, Vrijkotte T, van Eijsden M, Stronks K, Gemke R and van den Berg B.

- 1  
2  
3 Psychosocial stress during pregnancy is related to adverse birth outcomes: results from a large  
4 multi-ethnic community-based birth cohort. *Eur J Public Health* 2013;23:485-91.  
5  
6  
7 46. Goossen-Baremans A. Consensusdocument beslisregels dataset PRN. Versie 0.99. Utrecht:  
8 Stichting Perinatale Registratie Nederland. 2009. Available from  
9 <http://www.perinatreg.nl/publicaties?noCache=602;1459936592> [Dutch]  
10  
11  
12 47. Wijma K, Wijma B, Zar M. Psychometric aspects of the W-DEQ: a new questionnaire for the  
13 measurement of fear of childbirth. *J Psychosom Obstet Gynaecol* 1998;19:84-97.  
14  
15 48. Amelink-Verburg MP, Rijnders ME, Buitendijk SE. A trend analysis in referrals during pregnancy  
16 and labour in Dutch midwifery care 1988-2004. *BJOG* 2009;116:923-32.  
17  
18  
19 49. Koelewijn JM, Vrijkotte TGM, De Haas M, Van der Schoot CE, Bonsel GJ. Women's attitude towards  
20 prenatal screening for red blood cell antibodies, other than RhD. *BMC Pregnancy and Childbirth*  
21 2008;8:49.  
22  
23  
24 50. Fontein-Kuipers YM, Ausems M, Budé L, Van Limbeek E, De Vries R, Nieuwenhuijze M. Factors  
25 influencing maternal distress among Dutch women with a healthy pregnancy. *Women and Birth*  
26 2015;28:e36043.  
27  
28  
29 51. Perkin MR, Bland JM, Peacock, JL, Anderson HR. The effect of anxiety and depression during  
30 pregnancy on obstetric complications. *BJOG* 1993;100:629-634.  
31  
32  
33 52. Thomson, M., Hanley, J. Factors predisposing to difficult labour in primiparas. *Am J Obstet Gynecol*  
34 1988;158:1074-1078.  
35  
36  
37 53. Bricker L, Luckas M. Amniotomy alone for induction of labour. *Cochrane Database of Systematic*  
38 *Reviews* 2000, Issue 4. Art.no.: CD002862  
39  
40  
41 54. Howarth G, Botha DJ. Amniotomy plus intravenous oxytocin for induction of labour. *Cochrane*  
42 *Database of Systematic Reviews* 2001, Issue 3. Art. No.: CD003250.  
43  
44  
45 55. Alderliesten ME, Vrijkotte TG, van der Wal MF, Bonsel GJ. Late start of antenatal care among  
46 ethnic minorities in a large cohort of pregnant women. *BJOG* 2007;114(10):1232-9.  
47  
48  
49 56. Rijnders M, Baston H, Prins M, Schonbeck Y, vd Pal K, Green J, Buitendijk S. Perinatal factors  
50 related to negative or positive recall of birth experience, in women three years postpartum in the  
51 Netherlands. *Birth* 2008;35:107-16  
52  
53  
54  
55  
56  
57  
58  
59  
60

- 1  
2  
3 57. Dutch Perinatal Registration. Perinatal Care in the Netherlands 2013. [Internet] Utrecht: Stichting  
4  
5 Perinatale Registratie Nederland 2014, Table 9.3.1. Available from  
6  
7 [http://www.perinatreg.nl/uploads/150/153/PRN\\_jaarboek\\_2013\\_09122014.pdf](http://www.perinatreg.nl/uploads/150/153/PRN_jaarboek_2013_09122014.pdf) [Dutch]  
8  
9  
10  
11  
12  
13  
14  
15  
16  
17  
18  
19  
20  
21  
22  
23  
24  
25  
26  
27  
28  
29  
30  
31  
32  
33  
34  
35  
36  
37  
38  
39  
40  
41  
42  
43  
44  
45  
46  
47  
48  
49  
50  
51  
52  
53  
54  
55  
56  
57  
58  
59  
60

For peer review only

1  
2  
3  
4  
5  
6  
7  
8  
9  
10  
11  
12  
13  
14  
15  
16  
17  
18  
19  
20  
21  
22  
23  
24  
25  
26  
27  
28  
29  
30  
31  
32  
33  
34  
35  
36  
37  
38  
39  
40  
41  
42  
43  
44  
45  
46  
47  
48  
49  
50  
51  
52  
53  
54  
55  
56  
57  
58  
59  
60

Figure 1. Flowchart of the ABCD study and inclusion in the current analyses

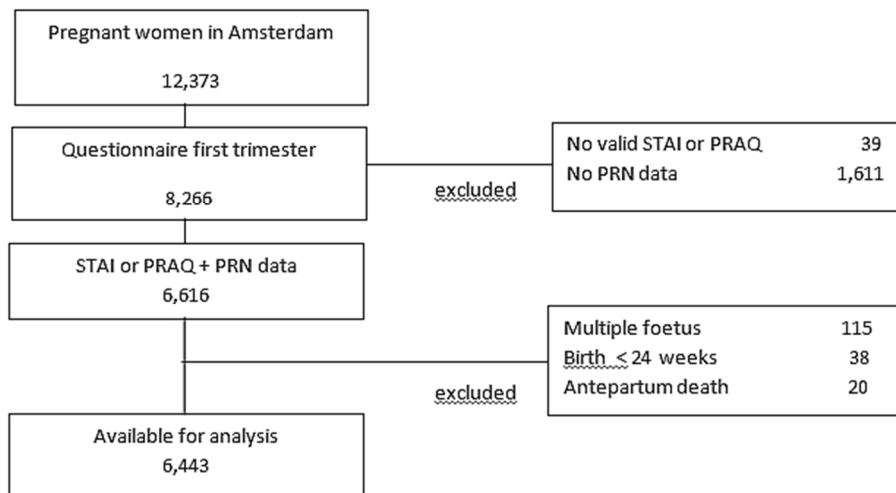

STAI = State Trait Anxiety Inventory  
PRAQ = Pregnancy-Related Anxiety Questionnaire  
PRN = Dutch Perinatal Registration

ew only

**Supplemental Table I. Univariate and multivariate associations between first trimester general and pregnancy related anxiety and (interventions in) the birth process, according to care at start of labour**

| Outcome                            | General anxiety    |                     |                            |                                            | Pregnancy-related anxiety |                    |                            |                                            |
|------------------------------------|--------------------|---------------------|----------------------------|--------------------------------------------|---------------------------|--------------------|----------------------------|--------------------------------------------|
|                                    | Low<br>n=4126<br>% | High<br>n=1850<br>% | Crude model<br>OR (95% CI) | Adjusted model <sup>1</sup><br>OR (95% CI) | Low<br>n=5348<br>%        | High<br>n=662<br>% | Crude model<br>OR (95% CI) | Adjusted model <sup>1</sup><br>OR (95% CI) |
| Augmentation <sup>2</sup>          |                    |                     |                            |                                            |                           |                    |                            |                                            |
| primary care                       | 19.7               | 19.4                | 1.01 (0.85-1.22)           | 1.07 (0.87-1.31)                           | 19.4                      | 21.8               | 1.20 (0.93-1.55)           | 1.01 (0.76-1.34)                           |
| secondary care                     | 34.7               | 27.7                | 0.74 (0.61-0.89)           | 0.84 (0.68-1.04)                           | 32.4                      | 31.8               | 0.99 (0.75-1.31)           | 0.95 (0.70-1.29)                           |
| Pain relief/sedation <sup>2</sup>  |                    |                     |                            |                                            |                           |                    |                            |                                            |
| primary care                       | 10.5               | 11.3                | 1.12 (0.89-1.41)           | 1.14 (0.88-1.47)                           | 10.4                      | 13.9               | 1.47 (1.08-2.01)           | 1.23 (0.88-1.73)                           |
| secondary care                     | 22.6               | 24.6                | 1.12 (0.91-1.38)           | 1.30 (1.03-1.63)                           | 21.9                      | 33.7               | 1.87(1.41-2.48)            | 1.81 (1.33-2.46)                           |
| Secondary caesarean <sup>2</sup>   |                    |                     |                            |                                            |                           |                    |                            |                                            |
| primary care                       | 4.9                | 4.6                 | 0.98 (0.70-1.37)           | 0.95 (0.66-1.38)                           | 4.7                       | 5.8                | 1.24 (0.78-1.97)           | 1.01 (0.62-1.65)                           |
| secondary care                     | 19.2               | 16.6                | 0.90 (0.72-1.14)           | 0.95 (0.74-1.22)                           | 17.4                      | 19.5               | 1.17 (0.84-1.63)           | 1.16 (0.81-1.64)                           |
| First stage >12 hr <sup>3</sup>    |                    |                     |                            |                                            |                           |                    |                            |                                            |
| primary care                       | 19.4               | 19.8                | 1.03 (0.85-1.25)           | 1.07 (0.86-1.34)                           | 19.2                      | 22.1               | 1.24 (0.95-1.63)           | 1.00 (0.74-1.35)                           |
| secondary care                     | 21.2               | 28.6                | 1.55 (0.65-3.68)           | 1.62 (0.56-4.73)                           | 23.6                      | 12.5               | 0.48 (0.06-4.03)           | 0.24 (0.02-3.03)                           |
| Second stage >=90 min <sup>4</sup> |                    |                     |                            |                                            |                           |                    |                            |                                            |
| primary care                       | 11.3               | 8.0                 | 0.67 (0.57-0.81)           | 0.91 (0.68-1.23)                           | 10.4                      | 10.3               | 0.93 (0.64-1.36)           | 0.96 (0.64-1.45)                           |
| secondary care                     | 10.7               | 5.8                 | 0.51 (0.35-0.75)           | 0.82 (0.54-1.24)                           | 9.3                       | 6.7                | 0.73 (0.41-1.29)           | 0.94 (0.51-1.74)                           |
| Instrumental delivery <sup>4</sup> |                    |                     |                            |                                            |                           |                    |                            |                                            |
| primary care                       | 9.7                | 8.2                 | 0.84 (0.65-1.10)           | 1.10 (0.82-1.47)                           | 9.1                       | 10.2               | 1.11 (0.77-1.61)           | 1.10 (0.73-1.63)                           |
| secondary care                     | 18.4               | 12.8                | 0.65 (0.49-0.86)           | 0.98 (0.72-1.32)                           | 16.7                      | 12.9               | 0.73 (0.47-1.12)           | 0.86 (0.54-1.36)                           |

<sup>1</sup>Adjusted for BMI, maternal age, years of education, ethnicity, smoking, alcohol, diabetes, hypertension, gestational age, birth weight <sup>2</sup>Excluded women with primary caesarean section

<sup>3</sup>Excluded women with caesarean section; data available for 3530 women (only recorded in perinatal registry of midwives) <sup>4</sup>Excluded women with caesarean section (primary/secondary)



STROBE 2007 (v4) Statement—Checklist of items that should be included in reports of cohort studies

| Section/Topic             | Item # | Recommendation                                                                                                                                                                       | Reported on page # |
|---------------------------|--------|--------------------------------------------------------------------------------------------------------------------------------------------------------------------------------------|--------------------|
| Title and abstract        | 1      | (a) Indicate the study’s design with a commonly used term in the title or the abstract                                                                                               | 1                  |
|                           |        | (b) Provide in the abstract an informative and balanced summary of what was done and what was found                                                                                  | 2-3                |
| <b>Introduction</b>       |        |                                                                                                                                                                                      |                    |
| Background/rationale      | 2      | Explain the scientific background and rationale for the investigation being reported                                                                                                 | 4-5                |
| Objectives                | 3      | State specific objectives, including any prespecified hypotheses                                                                                                                     | 5                  |
| <b>Methods</b>            |        |                                                                                                                                                                                      |                    |
| Study design              | 4      | Present key elements of study design early in the paper                                                                                                                              | 5                  |
| Setting                   | 5      | Describe the setting, locations, and relevant dates, including periods of recruitment, exposure, follow-up, and data collection                                                      | 5-6                |
| Participants              | 6      | (a) Give the eligibility criteria, and the sources and methods of selection of participants. Describe methods of follow-up                                                           | 5-6                |
|                           |        | (b) For matched studies, give matching criteria and number of exposed and unexposed                                                                                                  |                    |
| Variables                 | 7      | Clearly define all outcomes, exposures, predictors, potential confounders, and effect modifiers. Give diagnostic criteria, if applicable                                             | 6-8                |
| Data sources/ measurement | 8*     | For each variable of interest, give sources of data and details of methods of assessment (measurement). Describe comparability of assessment methods if there is more than one group | 6-8                |
| Bias                      | 9      | Describe any efforts to address potential sources of bias                                                                                                                            | 6-8                |
| Study size                | 10     | Explain how the study size was arrived at                                                                                                                                            | 6-7                |
| Quantitative variables    | 11     | Explain how quantitative variables were handled in the analyses. If applicable, describe which groupings were chosen and why                                                         | 8-9                |
| Statistical methods       | 12     | (a) Describe all statistical methods, including those used to control for confounding                                                                                                | 8-9                |
|                           |        | (b) Describe any methods used to examine subgroups and interactions                                                                                                                  | 8-9                |
|                           |        | (c) Explain how missing data were addressed                                                                                                                                          | 8-9                |
|                           |        | (d) If applicable, explain how loss to follow-up was addressed                                                                                                                       | 8-9                |
|                           |        | (e) Describe any sensitivity analyses                                                                                                                                                |                    |
| <b>Results</b>            |        |                                                                                                                                                                                      |                    |

|                          |     |                                                                                                                                                                                                              |               |
|--------------------------|-----|--------------------------------------------------------------------------------------------------------------------------------------------------------------------------------------------------------------|---------------|
| Participants             | 13* | (a) Report numbers of individuals at each stage of study—eg numbers potentially eligible, examined for eligibility, confirmed eligible, included in the study, completing follow-up, and analysed            | 10            |
|                          |     | (b) Give reasons for non-participation at each stage                                                                                                                                                         | 10            |
|                          |     | (c) Consider use of a flow diagram                                                                                                                                                                           | Suppl file    |
| Descriptive data         | 14* | (a) Give characteristics of study participants (eg demographic, clinical, social) and information on exposures and potential confounders                                                                     | Table 1, p 11 |
|                          |     | (b) Indicate number of participants with missing data for each variable of interest                                                                                                                          | All tables    |
|                          |     | (c) Summarise follow-up time (eg, average and total amount)                                                                                                                                                  |               |
| Outcome data             | 15* | Report numbers of outcome events or summary measures over time                                                                                                                                               | Table 2 and 3 |
| Main results             | 16  | (a) Give unadjusted estimates and, if applicable, confounder-adjusted estimates and their precision (eg, 95% confidence interval). Make clear which confounders were adjusted for and why they were included | Table 2 and 3 |
|                          |     | (b) Report category boundaries when continuous variables were categorized                                                                                                                                    |               |
|                          |     | (c) If relevant, consider translating estimates of relative risk into absolute risk for a meaningful time period                                                                                             |               |
| Other analyses           | 17  | Report other analyses done—eg analyses of subgroups and interactions, and sensitivity analyses                                                                                                               |               |
| <b>Discussion</b>        |     |                                                                                                                                                                                                              |               |
| Key results              | 18  | Summarise key results with reference to study objectives                                                                                                                                                     | 19            |
| <b>Limitations</b>       |     |                                                                                                                                                                                                              |               |
| Interpretation           | 20  | Give a cautious overall interpretation of results considering objectives, limitations, multiplicity of analyses, results from similar studies, and other relevant evidence                                   | 19-23         |
| Generalisability         | 21  | Discuss the generalisability (external validity) of the study results                                                                                                                                        | 23            |
| <b>Other information</b> |     |                                                                                                                                                                                                              |               |
| Funding                  | 22  | Give the source of funding and the role of the funders for the present study and, if applicable, for the original study on which the present article is based                                                | 24            |

\*Give information separately for cases and controls in case-control studies and, if applicable, for exposed and unexposed groups in cohort and cross-sectional studies.

**Note:** An Explanation and Elaboration article discusses each checklist item and gives methodological background and published examples of transparent reporting. The STROBE checklist is best used in conjunction with this article (freely available on the Web sites of PLoS Medicine at <http://www.plosmedicine.org/>, Annals of Internal Medicine at <http://www.annals.org/>, and Epidemiology at <http://www.epidem.com/>). Information on the STROBE Initiative is available at [www.strobe-statement.org](http://www.strobe-statement.org).

# BMJ Open

## Possible relationship between general and pregnancy-related anxiety during the first half of pregnancy and the birth process: a prospective cohort study

|                                 |                                                                                                                                                                                                                                                                                                                                                                                              |
|---------------------------------|----------------------------------------------------------------------------------------------------------------------------------------------------------------------------------------------------------------------------------------------------------------------------------------------------------------------------------------------------------------------------------------------|
| Journal:                        | <i>BMJ Open</i>                                                                                                                                                                                                                                                                                                                                                                              |
| Manuscript ID                   | bmjopen-2016-013413.R2                                                                                                                                                                                                                                                                                                                                                                       |
| Article Type:                   | Research                                                                                                                                                                                                                                                                                                                                                                                     |
| Date Submitted by the Author:   | 09-Jan-2017                                                                                                                                                                                                                                                                                                                                                                                  |
| Complete List of Authors:       | Koelewijn, Johanna; Sanquin Research and Landsteiner Laboratory, University of Amsterdam, Experimental Immunohematology; Academic Medical Center, University of Amsterdam, Obstetrics and Gynecology<br>Sluijs, Anne; Leiden University Medical Center, University of Leiden, Obstetrics and Gynecology<br>Vrijkotte, Tanja; Academic Medical Center, University of Amsterdam, Public Health |
| <b>Primary Subject Heading</b>: | Obstetrics and gynaecology                                                                                                                                                                                                                                                                                                                                                                   |
| Secondary Subject Heading:      | Mental health                                                                                                                                                                                                                                                                                                                                                                                |
| Keywords:                       | anxiety, birth process, interventions, ethnicity, parity                                                                                                                                                                                                                                                                                                                                     |
|                                 |                                                                                                                                                                                                                                                                                                                                                                                              |

SCHOLARONE™  
Manuscripts

1  
2  
3 **Possible relationship between general and pregnancy-related anxiety during the first half of**  
4  
5 **pregnancy and the birth process: a prospective cohort study**  
6

7 Corresponding author:  
8

9  
10 T.G.M. Vrijkotte<sup>1</sup>, PhD  
11

12 <sup>1</sup>Department of Public Health, Academic Medical Center, University of Amsterdam, P.O. Box 22660,  
13 1100 DD Amsterdam, the Netherlands.

14 T: +31-20-5664523  
15

16  
17 [E: t.vrijkotte@amc.uva.nl](mailto:t.vrijkotte@amc.uva.nl)  
18

19 J.M. Koelewijn<sup>1,2</sup> PhD  
20

21 <sup>1</sup>Sanquin Research and Landsteiner Laboratory, University of Amsterdam, Department Experimental  
22 Immunohematology, Plesmanlaan 125, 1066 CX Amsterdam, the Netherlands.  
23

24  
25 <sup>2</sup>Department of Obstetrics and Gynaecology, Academic Medical Center, University of Amsterdam, P.O.  
26 Box 22660, 1100 DD Amsterdam, the Netherlands.  
27

28  
29  
30 Anne-Marie Sluijs, MSc<sup>4</sup>  
31

32 <sup>4</sup>Department Obstetrics and Gynecology, Leiden University Medical Center, University of Leiden, P.O.  
33 Box 9600, 2300 RC Leiden, the Netherlands.  
34

35  
36 **Keywords:** Anxiety, Birth process, Interventions, Ethnicity, Parity  
37

38  
39 **Word count:** 4033  
40  
41  
42  
43  
44  
45  
46  
47  
48  
49  
50  
51  
52  
53  
54  
55  
56  
57  
58  
59  
60

**ABSTRACT**

**Objectives** The rate of interventions during childbirth has increased dramatically during the last decades. Maternal anxiety might play a role in the progress of the labour process and interventions during labour. This study aimed to identify associations between anxiety in the first half of pregnancy and the birth process, including any interventions required during labour. In addition, differences in the associations by parity and ethnicity were explored.

**Design** Prospective cohort study

**Setting** Primary care midwifery practices and secondary/tertiary care obstetric practices in Amsterdam, participating in the multi-ethnic ABCD study (participation rate 96%; response 8,266/12,373 (67%)).

**Participants** Included were women with singletons, alive at labour start, with a gestational age  $\geq 24$  weeks (n=6,443).

**Independent variable** General anxiety (STAI state) and pregnancy-related anxiety (PRAQ), were self-reported in the first half of pregnancy.

**Outcomes** Associations between both forms of anxiety and several indicators of the birth process were analysed. Subgroup analyses were performed for parity and ethnicity.

**Results** The prevalence of high general anxiety (STAI score  $\geq 43$ ) and pregnancy-related anxiety (PRAQ score  $\geq 90$ ) were 30.9% and 11.0%, respectively. After adjustment, in nulliparae, both general and pregnancy-related anxiety were associated with pain relief and/or sedation (OR for general anxiety 1.23;95%-CI 1.02-1.48;OR for pregnancy-related anxiety 1.45;95%-CI 1.14-1.85). In multiparae, general anxiety was associated with induction of labour (OR 1.53;95%-CI 1.16-2.03), pregnancy-related anxiety was associated with primary

1  
2  
3 caesarean section (OR 1.66;95%-CI 1.02-2.70). Associations were largely similar for all  
4  
5 ethnicities.

## 6 7 **Conclusions**

8  
9  
10 High levels of general and pregnancy-related anxiety in early pregnancy contribute modestly  
11  
12 to more interventions during the birth process with similar associations between ethnic  
13  
14 groups, but with some differences between nulliparae and multiparae.  
15  
16

17  
18  
19  
20 **Abbreviations:** ABCD study = Amsterdam Born Children and their Development study, BMI =  
21  
22 body mass index, PRN = Dutch Perinatal Registration, STAI = State Trait Anxiety Inventory,  
23  
24 PRAQ = Pregnancy-Related Anxiety Questionnaire  
25  
26

## 27 28 **STRENGTH AND LIMITATIONS**

### 29 30 31 Strengths

- 32  
33  
34 - We performed a prospective study in a large multi-ethnic cohort.
- 35  
36  
37 - We used validated questionnaires to assess both forms of anxiety.
- 38  
39  
40 - Anxiety was measured in the first half of pregnancy.
- 41  
42

### 43 44 Limitations

- 45  
46  
47 - The subscale for Fear of Childbirth (FOC) within the Pregnancy-Related Anxiety  
48  
49 Inventory was not suitable to measure FOC in multiparous women. Therefore, our  
50  
51 focus was on the total score on pregnancy-related anxiety and not on the subscales.  
52  
53  
54  
55  
56  
57  
58  
59  
60

1  
2  
3 - Our data are collected in 2003 and 2004. Since 2004 the intervention rate has  
4  
5 increased, but there is no reason to assume that the association between anxiety and  
6  
7 (interventions in) the birth process has changed.  
8  
9  
10  
11  
12  
13  
14  
15  
16  
17  
18  
19  
20  
21  
22  
23  
24  
25  
26  
27  
28  
29  
30  
31  
32  
33  
34  
35  
36  
37  
38  
39  
40  
41  
42  
43  
44  
45  
46  
47  
48  
49  
50  
51  
52  
53  
54  
55  
56  
57  
58  
59  
60

For peer review only

## INTRODUCTION

The rate of interventions during childbirth has increased dramatically in recent decades. For example, in the Netherlands, from 1993-2002 the caesarean section rate rose from 8.1% to 13.6%. and 16.7% in 2010.[1,2] The rate of labour induction increased during 2008-2013 from 15% to 21%.[3] Although the absolute incidence of caesarean section is higher in other western countries compared to the Netherland, a similar rise in caesarean sections occurred in other western countries.[4-7]

The progression of the birth process and concomitant interventions are associated with maternal characteristics such as age, parity, body mass index (BMI), ethnicity, illness, infant birth weight, as well as with organisational factors, such as existing guidelines, the availability of 24-h pain relief, the profession of the obstetric care provider (midwife versus physician), and the level of care (primary/secondary).[8-12] Moreover, maternal anxiety might play a role in the birth process. Although one review found no overall association between anxiety and obstetric complications, specific types of anxiety (such as fear of childbirth) may be associated with specific complications and interventions, such as prolonged labour and caesarean section.[13]

Several studies have shown a relationship between fear of childbirth and duration of labour [14-16], epidural analgesia [17] and elective [18-22] and emergency caesarean. [15,23]

On the other hand, other studies reported no such relationships.[24-26] One explanation for these inconsistencies could be differences in cultural, social and organisational characteristics between countries. These factors can mediate or exacerbate the effect of anxiety on the birth process and on concomitant interventions. For example, some ethnic groups are more



1  
2  
3 susceptible to stress-induced neuroendocrine and inflammatory pathways which could lead to  
4  
5 adverse perinatal outcomes.[27-30] Also, cultural and social differences between ethnic  
6  
7 groups (e.g. language barriers, unfamiliarity with the obstetric care organisation) may explain  
8  
9 differences between ethnic groups regarding the influence of anxiety on the birth process.[31-  
10  
11 34] In addition, it is unknown whether the association between anxiety and the birth process  
12  
13 differs between nulliparous and multiparous women as well as between women giving birth  
14  
15 in primary and secondary care. To our knowledge, no study has investigated the level of care  
16  
17 and ethnicity in the association between general and pregnancy-related anxiety, and the  
18  
19 progression of birth.  
20  
21  
22  
23

24  
25 Anxiety in pregnancy is associated with shorter gestational age and has negative implications  
26  
27 for fetal neurodevelopment and child outcomes.[35] Women with high fear of childbirth in  
28  
29 pregnancy are at risk for psychiatric problems postpartum, for example postpartum  
30  
31 depression and even posttraumatic stress syndrome (PTSS). [35-37] To lower the risk for  
32  
33 those serious consequences, appropriate treatment is desirable. If anxiety does also have a  
34  
35 detrimental effect on the birth process, there is all the more reason for screening early in  
36  
37 pregnancy for anxiety. Screening for anxiety early in pregnancy, provides sufficient time for  
38  
39 treatment or therapy for women with high anxiety levels.  
40  
41  
42  
43

44  
45 Therefore, this study investigates the association between general anxiety and/or pregnancy-  
46  
47 related anxiety measured during the first half of pregnancy and the birth process, and the  
48  
49 interaction of this association with parity, ethnicity and the level of care at the start of labour.  
50  
51

## 52 53 54 55 **METHODS**

## Study design and participants

Data were derived from the Amsterdam Born Children and their Development (ABCD) study, a large multi-ethnic prospective cohort study.[38] The ABCD study is aimed at examining the relationship between maternal lifestyle and psychosocial conditions during pregnancy and the child's health at birth as well as later in life. Between January 2003 and March 2004, participating obstetric care providers (midwives and hospital obstetricians; participation rate 96%) invited pregnant women in Amsterdam at their first antenatal visit to enroll in the ABCD. A total of 12,373 women were approached (99% of the target population). Within two weeks of this first contact, women who agreed to take part were sent a questionnaire, covering socio-demographic conditions, obstetric history and psychosocial conditions, including general and pregnancy-related anxiety. Consent forms were also sent for the linkage of study data to medical records as well as to data from the Dutch Perinatal Registration (PRN).

A total of 8266 women (response rate 67%) filled in the pregnancy questionnaire at an average of 16 weeks gestation (IQR 14-18 weeks) and 7043 gave permission for perusal of their medical records. Three months after birth, the women who gave permission for follow-up (n=6854) received a questionnaire concerning, amongst other things, the course of pregnancy and delivery. A total of 5218 mothers filled out this questionnaire. [38] To facilitate participation by women unable to speak Dutch, questionnaires were also available in Turkish, Arabic and English, and women could also complete the questionnaire with the assistance of an interviewer. Participation of foreign-born women was lower (42-64%) than for Dutch-born women (77%) but comparable with response rates in other population-based, multi-ethnic studies in the Netherlands.[39] In the present study we included women with a singleton pregnancy, a gestational age  $\geq 24$  weeks, and a living foetus at the start of labour.

1  
2  
3 Approval for the study was obtained from the Medical Ethical Committees of the participating  
4  
5 hospitals and the Registration Committee of the Municipality of Amsterdam. All women gave  
6  
7 written informed consent.  
8  
9

## 14 Definition and measurement of variables

### 17 *General and pregnancy-related anxiety*

20 General anxiety was assessed using the Dutch version of the State-Trait Anxiety Inventory  
21  
22 (STAI).[40-41] The 20 items regarding the state anxiety subscale were included in our  
23  
24 questionnaire, with each item scored on a 4-point scale. The anxiety score was dichotomised  
25  
26 in low-average (<43 points) and high anxiety ( $\geq 43$  points).[42] In our sample, the internal  
27  
28 consistency (Cronbach's alpha) of the scale was 0.94.  
29  
30

33 Pregnancy-related anxiety was assessed using an abbreviated 10-item version of the  
34  
35 Pregnancy-Related Anxieties Questionnaire (PRAQ).[43-44] The internal consistency  
36  
37 (Cronbach's alpha) was 0.79; each item was scored on a 4-point scale. Three aspects that can  
38  
39 be distinguished in the PRAQ are 'fear of labour', 'fear of bearing a physically or mentally  
40  
41 handicapped child' (hereafter 'fear of child') and 'concern about one's appearance'. In the  
42  
43 present study our focus was on the total score on pregnancy-related anxiety. One question  
44  
45 was only applicable for nulliparous women ("I am scared of labour and birth because I have  
46  
47 never experienced this"), resulting in a maximum score of 40 for nulliparous women and 36  
48  
49 for multiparous women. Because cut-off scores were not available for dichotomisation of the  
50  
51 results from this instrument, we used the 90<sup>th</sup> percentile to identify women with a high level  
52  
53 of pregnancy-related anxiety.[45] This resulted in cut-off scores of 28 and 24 for nulliparous  
54  
55  
56  
57  
58  
59  
60

1  
2  
3 and multiparous women, respectively. We performed additional explorative analyses, using  
4  
5 the PRAQ subscales 'fear of labour' (only for nulliparous women) and 'fear of child' These  
6  
7 were dichotomised based on the 10<sup>th</sup> percentile, the cut-offs for 'fear of labour' and 'fear of  
8  
9 child' were 10 and 12, respectively.  
10

### 11 12 13 *Birth process and interventions*

14  
15  
16 Outcome data on the birth process and interventions were obtained by linking our records  
17  
18 with the PRN database. Validation of the PRN database has been described previously.[39]  
19  
20 The outcome variables were determined from the records of the Registry of Midwives, the  
21  
22 Registry of Obstetricians and the Registry of Paediatricians according to the decision rules of  
23  
24 the PRN.[46]  
25  
26

27  
28  
29 We defined the following outcomes:  
30  
31

32 Birth process: duration of first stage of labour ( $\leq 12$  h/ $>12$  h; only available in registry of  
33  
34 midwives), duration of second stage ( $< 1.5$  h/ $\geq 1.5$  h)].  
35  
36

37 Interventions: primary caesarean (yes/no), induction of labour (yes/no), referral during labour  
38  
39 [only in the group that started labour under primary care; (yes/no)], augmentation (yes/no),  
40  
41 pain relief/sedation (yes/no), secondary caesarean (yes/no), vaginal instrumental delivery  
42  
43 [ventouse or forceps; (yes/no)  
44  
45  
46

### 47 48 *Covariates*

49  
50  
51 The following covariates were included in the analyses: maternal age (years), ethnicity,  
52  
53 education (years after primary school), pre-pregnancy BMI ( $\text{kg}/\text{m}^2$ ), parity  
54  
55 (nulliparae/multiparae), smoking during pregnancy (yes/no), alcohol use during pregnancy  
56  
57  
58

1  
2  
3 (yes/no), hypertensive disorders and diabetes (pre-existent or detected during pregnancy),  
4  
5 gestational age at delivery (weeks), care at start of labour (primary/secondary), and birth  
6  
7 weight (g). Ethnicity was based on the birth country of the participant's mother (self-  
8  
9 reported) and included the following categories: Dutch, Turkish, Moroccan, Black  
10  
11 (Antillean/Aruban, Surinamese, Ghanaian or other African descent), other non-Western and  
12  
13 other Western countries. Pre-pregnancy weight and height, education, smoking and alcohol  
14  
15 use during pregnancy were self-reported in the questionnaire. Parity, birth weight, gestational  
16  
17 age, hypertension and diabetes were extracted from the PRN database. Missing data  
18  
19 concerning parity, birth weight and gestational age were extracted from the three months  
20  
21 questionnaire; hypertension and diabetes were encoded as 'yes' if these diseases were  
22  
23 reported in the PRN database and/or in the three months questionnaire.  
24  
25  
26  
27  
28  
29  
30  
31  
32

### 33 **Statistical analysis**

34  
35  
36 Descriptive statistics were used to profile the sample characteristics according to the level of  
37  
38 maternal general anxiety and of pregnancy-related anxiety. Categorical variables were  
39  
40 described by percentages per category. Continuous variables were described using the mean  
41  
42 and 95% confidence intervals (CI), if normally distributed and, if not, with the median and  
43  
44 minimum and maximum values. Risks were presented as odds ratios (OR) and 95% CI.  
45  
46  
47 Differences were tested with Student's t test or Mann-Whitney U test for continuous variables  
48  
49 and Pearson's chi square test for categorical variables. Associations between high general  
50  
51 and/or pregnancy-related anxiety compared to low anxiety were analysed for each outcome  
52  
53 using multiple logistic regression analyses. All potential confounders were determined a priori  
54  
55  
56  
57  
58  
59  
60

1  
2  
3 and added to the regression model. We adjusted for general covariates: age, ethnicity,  
4  
5 education, pre-pregnancy BMI, parity, smoking and alcohol use. To avoid overadjustment, we  
6  
7 did not adjust for potential intermediate variables, such as hypertension, diabetes, gestational  
8  
9 age and birth weight. Subgroup analyses were performed according to parity (nulliparous  
10  
11 versus multiparous women), ethnicity (Dutch, Turkish, Moroccan and Black) and care at start  
12  
13 of labour (primary/secondary care). No subgroup analysis was performed in the ethnic groups  
14  
15 'other Western' and 'other non-Western' as each of these groups represented a diverse  
16  
17 selection of ethnicities. To formally test whether different associations existed for the  
18  
19 different subgroups (parity, ethnicity, and care at start of labour) between STAI or PRAQ and  
20  
21 the birth process variables, interaction terms (between parity, ethnicity respectively care at  
22  
23 start of labour with general and pregnancy-related anxiety) were added to the final model.  
24  
25 We performed additional explorative analyses, using the PRAQ subscales 'fear of labour' (only  
26  
27 for nulliparous women) and 'fear of child' following the same procedure.  
28  
29  
30  
31  
32  
33  
34  
35  
36  
37  
38  
39  
40  
41  
42  
43  
44  
45  
46  
47  
48  
49  
50  
51  
52  
53  
54  
55  
56  
57  
58  
59  
60

All analyses were performed with SPSS 21.0 (IBM Statistics, USA).

## RESULTS

### Response

Of the 8266 women who completed the pregnancy questionnaire, for 6616 women valid results for the STAI or PRAQ and outcome data, were available. The mean STAI-score was significantly higher in the group of women with missing outcome data (39.5 versus 38.2); the PRAQ-scores were comparable. After exclusion of 173 women (with a multiple foetus, a gestational age  $\leq$  24 weeks, or antenatal death), 6443 records were available for analysis (Figure 1). Most women completed both the STAI and the PRAQ (n=6335); 37 women completed only the STAI and 71 women only the PRAQ.

### Covariates according to anxiety levels

A high STAI score (further referred to as 'high general anxiety') was found in 30.9% of the sample and a high score on the PRAQ (further referred to as 'high pregnancy-related anxiety') in 11.1% of the sample. The STAI score was moderately correlated with the PRAQ score (Pearson's  $r=0.36$ ;  $p<0.001$ ).

High general anxiety and high pregnancy-related anxiety were more frequently observed in younger women, in women with non-Dutch ethnicities, fewer years of education, higher pre-pregnancy BMIs, smoking women, women with less alcohol consumption, and in women who gave birth to babies with a lower birth weight. There were no differences in the rates of hypertension and gestational age between the high and low anxiety groups; however, diabetes and secondary care at the start of labour were more frequently observed in women

with high general anxiety. Nulliparous women appeared to be at lower risk for high general anxiety compared to multiparous women. (Table 1)

**Table 1. Maternal characteristics according to general anxiety in the first half of pregnancy and pregnancy-related anxiety**

|                                           |                  | General anxiety            |                             |                          | Pregnancy-related anxiety  |                            |                          |
|-------------------------------------------|------------------|----------------------------|-----------------------------|--------------------------|----------------------------|----------------------------|--------------------------|
|                                           |                  | Low<br>n=4400 <sup>1</sup> | High<br>n=1972 <sup>1</sup> | p-<br>value <sup>2</sup> | Low<br>n=5697 <sup>1</sup> | High<br>n=709 <sup>1</sup> | p-<br>value <sup>2</sup> |
| Anxiety score                             | -median(min-max) |                            |                             |                          |                            |                            |                          |
| Nulliparae                                |                  | 33 (20-42)                 | 49 (43-80)                  |                          | 21 (10-27)                 | 30 (28-40)                 |                          |
| Multiparae                                |                  | 33 (20-42)                 | 49 (43-74)                  |                          | 18 (9-23)                  | 26 (24-36)                 |                          |
| Age (years)                               | -mean (95% CI)   | 31.5 (31.4-31.7)           | 29.7 (29.5-30.0)            | <.001                    | 31.2 (31.1-31.4)           | 28.7 (28.3-29.2)           | <.001                    |
| Ethnicity                                 | -%               |                            |                             | <.001                    |                            |                            | <.001                    |
| Dutch                                     |                  | 63.5                       | 38.9                        |                          | 58.8                       | 30.1                       |                          |
| Turkish                                   |                  | 2.6                        | 8.6                         |                          | 3.6                        | 12.9                       |                          |
| Moroccan                                  |                  | 5.4                        | 12.1                        |                          | 6.5                        | 15.3                       |                          |
| Black                                     |                  | 6.5                        | 12.8                        |                          | 8.6                        | 8.1                        |                          |
| Other                                     |                  | 14.1                       | 13.3                        |                          | 13.7                       | 14.4                       |                          |
| Western                                   |                  |                            |                             |                          |                            |                            |                          |
| Other non-<br>Western                     |                  | 7.9                        | 14.3                        |                          | 8.9                        | 19.3                       |                          |
| Education<br>(years)                      | -mean (95% CI)   | 9.6 (9.5-9.7)              | 7.5 (7.3-7.7)               | <.001                    | 9.2 (9.1-9.3)              | 7.1 (6.8-7.5)              | <.001                    |
| Pre-pregnancy<br>BMI (kg/m <sup>2</sup> ) | -mean (95% CI)   | 22.8 (22.7-22.9)           | 23.8 (23.6-24.0)            | <.001                    | 23.0 (22.9-23.1)           | 23.8 (23.5-24.1)           | <.001                    |
| Nulliparae                                | -%               | 59.1                       | 49.5                        | <.001                    | <sup>3</sup>               | <sup>3</sup>               |                          |
| Smoking in<br>pregnancy                   | -%               | 7.3                        | 15.2                        | <.001                    | 9.0                        | 15.0                       | <.001                    |
| Alcohol in<br>pregnancy                   | -%               | 24.7                       | 16.0                        | <.001                    | 22.9                       | 15.3                       | <.001                    |
| Hypertensive<br>disorders                 | -%               | 12.2                       | 12.5                        | .70                      | 12.1                       | 12.9                       | .54                      |
| Diabetes                                  | -%               | 1.8                        | 3.1                         | .001                     | 2.1                        | 3.1                        | .08                      |
| Gestational age                           | -%               |                            |                             | .27                      |                            |                            | .87                      |
| <37 weeks                                 |                  | 5.0                        | 6.0                         |                          | 5.4                        | 5.1                        |                          |
| 37-41<br>weeks                            |                  | 85.7                       | 84.7                        |                          | 85.4                       | 85.2                       |                          |
| >=42<br>weeks                             |                  | 9.3                        | 9.3                         |                          | 9.2                        | 9.7                        |                          |
| Care start<br>labour                      | -%               |                            |                             | <.001                    |                            |                            | .29                      |
| primary<br>care                           |                  | 60.1                       | 54.6                        |                          | 58.6                       | 56.6                       |                          |
| secondary<br>care                         |                  | 39.9                       | 45.4                        |                          | 41.4                       | 43.4                       |                          |
| Birth weight (g)                          | -mean (95% CI)   | 3473 (3456-3490)           | 3379 (3354-3405)            | <.001                    | 3450 (3435-3465)           | 3391 (3351-3431)           | .009                     |

<sup>1</sup> Missing values were excluded (range 0-217). <sup>2</sup> Continuous variables: Student's t-test and/or Mann-Whitney U test; categorical variables Pearson's Chi square test <sup>3</sup> No comparison possible between nulliparous and multiparous women because in each group the P90 was used as cut-off for high pregnancy-related anxiety



### Outcome prevalences

The prevalences of the indicators of the birth process are shown in Table 2.

Most prevalences were higher ( $p$ -values  $<0.05$ ) in nulliparous than in multiparous women, except primary caesarean section ( $p=0.09$ ). Most prevalences were similar in the different ethnicities, except for a higher prevalence of prolonged second stage of labour and instrumental delivery in Dutch women ( $p<0.001$ ).

**Table 2. Univariable and multivariable associations between general and pregnancy-related anxiety in the first half of pregnancy and (interventions in) the birth process, according to parity**

| Outcome                             | General anxiety    |                     |                            |                                            | Pregnancy-related anxiety |                    |                            |                                            |
|-------------------------------------|--------------------|---------------------|----------------------------|--------------------------------------------|---------------------------|--------------------|----------------------------|--------------------------------------------|
|                                     | Low<br>n=4400<br>% | High<br>n=1972<br>% | Crude model<br>OR (95% CI) | Adjusted model <sup>1</sup><br>OR (95% CI) | Low<br>n=5697<br>%        | High<br>n=709<br>% | Crude model<br>OR (95% CI) | Adjusted model <sup>1</sup><br>OR (95% CI) |
| Primary caesarean                   |                    |                     |                            |                                            |                           |                    |                            |                                            |
| Nulliparae                          | 5.6                | 3.9                 | 0.69 (0.47-0.99)           | 0.82 (0.56-1.20) <sup>6</sup>              | 5.2                       | 4.3                | 0.85 (0.51-1.39)           | 1.07 (0.64-1.79)                           |
| Multiparae                          | 5.4                | 7.2                 | 1.33 (0.97-1.83)           | 1.37 (0.97-1.93) <sup>6</sup>              | 5.8                       | 8.2                | 1.53 (0.96-2.42)           | <b>1.66 (1.02-2.70)</b>                    |
| Induction <sup>2</sup>              |                    |                     |                            |                                            |                           |                    |                            |                                            |
| Nulliparae                          | 11.7               | 12.2                | 1.07 (0.85-1.35)           | 1.06 (0.83-1.36) <sup>6</sup>              | 11.8                      | 12.4               | 1.01 (0.73-1.40)           | 1.03 (0.74-1.45)                           |
| Multiparae                          | 8.2                | 13.4                | <b>1.74 (1.34-2.25)</b>    | <b>1.53 (1.16-2.03)<sup>6</sup></b>        | 9.5                       | 14.7               | <b>1.68 (1.15-2.44)</b>    | 1.38 (0.92-2.07)                           |
| Referral during labour <sup>3</sup> |                    |                     |                            |                                            |                           |                    |                            |                                            |
| Nulliparae                          | 52.0               | 53.2                | 1.10 (0.90-1.34)           | 1.10 (0.89-1.35)                           | 51.7                      | 57.5               | 1.30 (0.99-1.71)           | 1.26 (0.95-1.67)                           |
| Multiparae                          | 18.8               | 23.6                | <b>1.33 (1.03-1.72)</b>    | 1.07 (0.81-1.41)                           | 19.8                      | 25.9               | 1.48 (0.99-1.20)           | 1.17 (0.78-1.78)                           |
| Augmentation <sup>2</sup>           |                    |                     |                            |                                            |                           |                    |                            |                                            |
| Nulliparae                          | 34.5               | 32.5                | 0.93 (0.80-1.10)           | 0.94 (0.79-1.11)                           | 34.4                      | 33.4               | 0.98 (0.79-1.23)           | 0.96 (0.76-1.21)                           |
| Multiparae                          | 11.7               | 13.1                | 1.17 (0.91-1.49)           | 1.10 (0.78-1.31)                           | 12.1                      | 13.7               | 1.18 (0.81-1.73)           | 1.02 (0.68-1.52)                           |
| Pain relief/sedation <sup>2</sup>   |                    |                     |                            |                                            |                           |                    |                            |                                            |
| Nulliparae                          | 21.3               | 26.6                | <b>1.35 (1.14-1.61)</b>    | <b>1.23 (1.02-1.48)</b>                    | 21.9                      | 30.2               | <b>1.59 (1.26-2.01)</b>    | <b>1.45 (1.14-1.85)</b>                    |
| Multiparae                          | 5.5                | 6.9                 | 1.27 (0.91-1.77)           | 1.26 (0.88-1.79)                           | 5.7                       | 8.6                | 1.56 (0.97-2.53)           | 1.61 (0.97-2.68)                           |
| Secondary caesarean <sup>2</sup>    |                    |                     |                            |                                            |                           |                    |                            |                                            |
| Nulliparae                          | 12.4               | 13.1                | 1.09 (0.87-1.37)           | 1.02 (0.80-1.30)                           | 12.3                      | 14.7               | 1.24 (0.92-1.67)           | 1.22 (0.89-1.67)                           |

|  |                                    |      |      |                         |                               |      |      |                  |                  |
|--|------------------------------------|------|------|-------------------------|-------------------------------|------|------|------------------|------------------|
|  | Multiparae                         | 5.8  | 6.2  | 1.07 (0.76-1.51)        | 1.03 (0.71-1.49)              | 5.9  | 5.9  | 0.92 (0.51-1.65) | 0.93 (0.50-1.71) |
|  | First stage >12 hr <sup>4</sup>    |      |      |                         |                               |      |      |                  |                  |
|  | Nulliparae                         | 30.5 | 33.1 | 1.12 (0.90-1.39)        | 1.00 (0.79-1.26)              | 31.1 | 31.1 | 1.04 (0.77-1.41) | 0.89 (0.64-1.22) |
|  | Multiparae                         | 3.9  | 5.8  | 1.59 (0.96-2.63)        | 1.43 (0.84-2.45)              | 4.4  | 7.2  | 1.85 (0.92-3.71) | 1.63 (0.78-3.38) |
|  | Second stage >=90 min <sup>5</sup> |      |      |                         |                               |      |      |                  |                  |
|  | Nulliparae                         | 18.4 | 12.6 | <b>0.64 (0.50-0.82)</b> | 0.79 (0.61-1.01) <sup>7</sup> | 17.2 | 14.5 | 0.80 (0.58-1.12) | 0.95 (0.67-1.35) |
|  | Multiparae                         | 1.3  | 2.0  | 1.51 (0.78-2.94)        | 1.74 (0.85-3.55) <sup>7</sup> | 1.6  | 1.3  | 0.82 (0.25-2.71) | 0.95 (0.28-3.24) |
|  | Instrumental delivery <sup>5</sup> |      |      |                         |                               |      |      |                  |                  |
|  | Nulliparae                         | 19.6 | 17.1 | 0.87 (0.70-1.07)        | 1.03 (0.82-1.29)              | 19.1 | 17.5 | 0.89 (0.66-1.20) | 1.03 (0.75-1.41) |
|  | Multiparae                         | 3.0  | 3.3  | 1.05 (0.65-1.70)        | 1.16 (0.69-1.93)              | 3.2  | 2.1  | 0.67 (0.27-1.68) | 0.75 (0.29-1.93) |

<sup>1</sup>Adjusted for BMI, maternal age, years of education, ethnicity, smoking, alcohol <sup>2</sup>Excluded women with primary caesarean section. <sup>3</sup>Only women under primary care at start of labour

<sup>4</sup>Excluded women with caesarean section; data available for 3533 women (only recorded in perinatal registry of midwives) <sup>5</sup>Excluded women with caesarean section (primary/ secondary) <sup>6</sup>p-value interaction parity and anxiety 0.018 <sup>7</sup>p-value interaction parity and anxiety 0.017

## Multivariable analyses

### *General anxiety and parity*

After adjustment, women with high general anxiety were more likely to receive pain relief/sedation, which association was only significant in nulliparous women. Multiparous women were more likely to undergo induction of labour, which was not seen in nulliparae. (Table 2). Moreover, statistically significant interactions between parity and general anxiety were found for primary caesarean section and a second stage of  $\geq 90$  min: highly anxious multiparous women were more likely to experience these two outcomes, compared to non-anxious women, while highly anxious nulliparous women were at decreased risk for these outcomes.

### *Pregnancy-related anxiety and parity*

After adjustment, women with high pregnancy-related anxiety were more likely to receive pain relief/sedation, which association was only significant in nulliparous women. Subgroup analysis showed an increased risk for primary caesarean in highly anxious multiparous women; however, no statistically significant interactions with parity were observed when formal interaction testing was completed (Table 2).

Analyses with the subscales showed similar trends with one exception: fear of labour was associated with an increased risk for pain relief/sedation in (nulliparous) women, which was not the case for high 'fear of child'.

### *General and pregnancy-related anxiety and ethnicity*

1  
2  
3 After adjustment, no statistically significant interactions were found between general or  
4 pregnancy-related anxiety with ethnicity for any of the outcome measures (all p-values  $\geq$   
5 0.12). The increased risk for pain relief/sedation was only significant in Dutch women with  
6 high general or pregnancy-related anxiety.  
7  
8  
9  
10

11  
12  
13 However, subgroup analyses suggested a statistically significant lower risk for primary  
14 caesarean in Moroccan women with high general anxiety, an increased risk for instrumental  
15 delivery in Moroccan women with high general anxiety and in Turkish women with high  
16 pregnancy-related anxiety. (Table 3).  
17  
18  
19  
20  
21

22  
23 Analyses with the subscales showed similar trends. However, in Dutch women with high 'fear  
24 of labour' the risk for a first stage of labour longer than 12 hours and for a second stage of  
25 labour longer than 1,5 hour was increased. High 'fear of child' was not associated with an  
26 increased risk for any of the outcome parameters. (Supplemental table 3a).  
27  
28  
29  
30  
31  
32  
33  
34  
35  
36  
37  
38  
39  
40  
41  
42  
43  
44  
45  
46  
47  
48  
49  
50  
51  
52  
53  
54  
55  
56  
57  
58  
59  
60

**Table 3. Univariable and multivariable associations between general and pregnancy-related anxiety in the first half of pregnancy and (interventions in) the birth process, according to ethnicity**

| Outcome                             |                    |                     | General anxiety            |                                            |                    |                    | Pregnancy-related anxiety  |                                            |
|-------------------------------------|--------------------|---------------------|----------------------------|--------------------------------------------|--------------------|--------------------|----------------------------|--------------------------------------------|
|                                     | Low<br>n=3430<br>% | High<br>n=1426<br>% | Crude model<br>OR (95% CI) | Adjusted model <sup>1</sup><br>OR (95% CI) | Low<br>n=4404<br>% | High<br>n=469<br>% | Crude model<br>OR (95% CI) | Adjusted model <sup>1</sup><br>OR (95% CI) |
| Primary caesarean                   |                    |                     |                            |                                            |                    |                    |                            |                                            |
| Dutch                               | 5.6                | 7.0                 | 1.28 (0.93-1.77)           | 1.26 (0.90-1.75)                           | 5.9                | 6.1                | 1.05 (0.59-1.88)           | 1.01 (0.56-1.81)                           |
| Turkish                             | 3.4                | 3.6                 | 1.05 (0.29-3.80)           | 0.97 (0.24-3.84)                           | 3.4                | 3.3                | 1.18 (0.29-4.84)           | 1.63 (0.35-7.52)                           |
| Moroccan                            | 5.2                | 2.1                 | 0.39 (0.14-1.13)           | 0.31 (0.10-0.94)                           | 3.3                | 3.8                | 1.16 (0.37-3.67)           | 1.29 (0.40-4.20)                           |
| Black                               | 6.5                | 4.4                 | 0.64 (0.29-1.43)           | 0.77 (0.33-1.78)                           | 6.1                | 1.8                | 0.31 (0.04-2.30)           | 0.41 (0.05-3.12)                           |
| Induction <sup>2</sup>              |                    |                     |                            |                                            |                    |                    |                            |                                            |
| Dutch                               | 10.1               | 13.3                | <b>1.37 (1.06-1.76)</b>    | 1.29 (0.99-1.67)                           | 10.7               | 12.5               | 1.20 (0.78-1.85)           | 1.05 (0.68-1.64)                           |
| Turkish                             | 10.7               | 13.5                | 1.26 (0.59-2.67)           | 1.21 (0.55-2.63)                           | 12.8               | 13.8               | 1.03 (0.47-2.28)           | 1.09 (0.48-2.47)                           |
| Moroccan                            | 9.5                | 10.3                | 1.08 (0.58-2.01)           | 1.08 (0.57-2.03)                           | 9.9                | 9.8                | 0.91 (0.42-1.97)           | 0.92 (0.42-2.03)                           |
| Black                               | 8.2                | 12.2                | 1.67 (0.92-3.04)           | 1.81 (0.96-3.43)                           | 9.4                | 14.5               | 1.49 (0.63-3.53)           | 1.44 (0.58-3.54)                           |
| Referral during labour <sup>3</sup> |                    |                     |                            |                                            |                    |                    |                            |                                            |
| Dutch                               | 36.3               | 38.5                | 1.10 (0.88-1.37)           | 1.19 (0.93-1.52)                           | 36.2               | 45.5               | 1.44 (0.99-2.09)           | 1.25 (0.84-1.86)                           |
| Turkish                             | 44.9               | 34.0                | 0.65 (0.34-1.22)           | 0.60 (0.30-1.22)                           | 33.3               | 47.4               | <b>2.02 (1.04-3.94)</b>    | 1.79 (0.87-3.69)                           |
| Moroccan                            | 41.5               | 47.4                | 1.25 (0.79-2.00)           | 1.54 (0.92-2.57)                           | 43.2               | 51.6               | 1.41 (0.80-2.49)           | 1.39 (0.75-2.56)                           |
| Black                               | 39.1               | 39.8                | 1.06 (0.64-1.73)           | 1.10 (0.64-1.87)                           | 39.8               | 34.3               | 0.82 (0.39-1.73)           | 0.84 (0.38-1.87)                           |
| Augmentation <sup>2</sup>           |                    |                     |                            |                                            |                    |                    |                            |                                            |
| Dutch                               | 24.2               | 22.4                | 0.91 (0.74-1.10)           | 0.93 (0.76-1.15)                           | 23.5               | 28.6               | 1.32 (0.96-1.81)           | 1.11 (0.80-1.55)                           |
| Turkish                             | 21.4               | 22.2                | 1.07 (0.60-1.92)           | 1.04 (0.56-1.92)                           | 20.5               | 25.3               | 1.27 (0.69-2.36)           | 1.16 (0.60-2.22)                           |
| Moroccan                            | 24.1               | 23.3                | 0.96 (0.62-1.49)           | 1.16 (0.73-1.84)                           | 24.3               | 22.5               | 0.96 (0.57-1.64)           | 0.91 (0.52-1.59)                           |
| Black                               | 22.6               | 21.0                | 0.94 (0.61-1.45)           | 1.03 (0.65-1.64)                           | 21.9               | 20.8               | 0.95 (0.47-1.93)           | 0.87 (0.42-1.83)                           |
| Pain relief/ sedation <sup>2</sup>  |                    |                     |                            |                                            |                    |                    |                            |                                            |
| Dutch                               | 13.8               | 17.7                | <b>1.35 (1.08-1.68)</b>    | <b>1.30 (1.02-1.65)</b>                    | 14.0               | 25.1               | <b>2.08 (1.49-2.91)</b>    | <b>1.70 (1.20-2.41)</b>                    |
| Turkish                             | 15.2               | 14.8                | 0.99 (0.50-1.95)           | 1.05 (0.49-2.25)                           | 13.8               | 19.5               | 1.63 (0.82-3.25)           | 1.74 (0.79-3.82)                           |
| Moroccan                            | 12.7               | 16.4                | 1.32 (0.78-2.24)           | 1.59 (0.90-2.79)                           | 12.7               | 18.6               | 1.62 (0.89-2.93)           | 1.52 (0.81-2.86)                           |
| Black                               | 15.1               | 13.7                | 0.90 (0.54-1.50)           | 1.05 (0.60-1.85)                           | 13.7               | 22.6               | 1.89 (0.94-3.83)           | 1.89 (0.87-4.12)                           |
| Secondary caesarean <sup>2</sup>    |                    |                     |                            |                                            |                    |                    |                            |                                            |
| Dutch                               | 8.6                | 10.1                | 1.20 (0.91-1.59)           | 1.19 (0.89-1.59)                           | 8.7                | 12.1               | 1.38 (0.88-2.16)           | 1.20 (0.75-1.90)                           |
| Turkish                             | 6.3                | 9.3                 | 1.44 (0.56-3.70)           | 1.39 (0.52-3.68)                           | 7.2                | 8.0                | 1.29 (0.50-3.37)           | 1.31 (0.48-3.57)                           |
| Moroccan                            | 10.0               | 7.8                 | 0.75 (0.39-1.43)           | 0.89 (0.45-1.78)                           | 9.0                | 8.8                | 0.88 (0.39-1.99)           | 0.90 (0.39-2.11)                           |
| Black                               | 15.1               | 10.3                | 0.66 (0.38-1.16)           | 0.78 (0.43-1.41)                           | 12.1               | 15.1               | 1.36 (0.60-3.05)           | 1.47 (0.63-3.47)                           |

| Outcome                            | General anxiety    |                     |                            |                                            | Pregnancy-related anxiety |                    |                                            |                            |
|------------------------------------|--------------------|---------------------|----------------------------|--------------------------------------------|---------------------------|--------------------|--------------------------------------------|----------------------------|
|                                    | Low<br>n=3430<br>% | High<br>n=1426<br>% | Crude model<br>OR (95% CI) | Adjusted model <sup>1</sup><br>OR (95% CI) | Low<br>n=4404<br>%        | High<br>n=469<br>% | Adjusted model <sup>1</sup><br>OR (95% CI) | Crude model<br>OR (95% CI) |
| First stage >12 hr <sup>4</sup>    |                    |                     |                            |                                            |                           |                    |                                            |                            |
| Dutch                              | 17.9               | 19.1                | 1.09 (0.82-1.44)           | 1.16 (0.85-1.57)                           | 18.1                      | 19.1               | 1.08 (0.66-1.76)                           | 0.92 (0.55-1.53)           |
| Turkish                            | 14.5               | 19.1                | 1.44 (0.62-3.34)           | 1.01 (0.38-2.68)                           | 17.5                      | 16.7               | 1.03 (0.43-2.46)                           | 0.57 (0.20-1.58)           |
| Moroccan                           | 21.8               | 19.0                | 0.89 (0.50-1.59)           | 1.06 (0.56-2.03)                           | 20.1                      | 21.0               | 1.09 (0.54-2.19)                           | 0.96 (0.45-2.06)           |
| Black                              | 20.2               | 22.0                | 1.16 (0.59-2.27)           | 1.27 (0.60-2.69)                           | 21.3                      | 17.2               | 0.80 (0.29-2.25)                           | 0.80 (0.26-2.45)           |
| Second stage >=90 min <sup>5</sup> |                    |                     |                            |                                            |                           |                    |                                            |                            |
| Dutch                              | 12.6               | 8.9                 | 0.68 (0.50-0.92)           | 0.79 (0.57-1.08)                           | 11.7                      | 13.0               | 1.12 (0.71-1.78)                           | 1.02 (0.63-1.66)           |
| Turkish                            | 4.9                | 5.6                 | 1.16 (0.37-3.65)           | 1.06 (0.32-3.51)                           | 3.4                       | 10.3               | 2.30 (0.97-9.20)                           | 3.01 (0.91-9.93)           |
| Moroccan                           | 7.7                | 4.8                 | 0.59 (0.26-1.34)           | 0.79 (0.33-1.91)                           | 6.3                       | 6.5                | 1.07 (0.41-2.75)                           | 1.04 (0.39-2.80)           |
| Black                              | 2.9                | 3.6                 | 1.26 (0.42-3.83)           | 1.34 (0.42-4.26)                           | 3.3                       | 2.4                | 0.74 (0.09-5.82)                           | 0.64 (0.08-5.28)           |
| Instrumental delivery <sup>5</sup> |                    |                     |                            |                                            |                           |                    |                                            |                            |
| Dutch                              | 13.6               | 12.0                | 0.87 (0.66-1.13)           | 0.96 (0.72-1.27)                           | 13.3                      | 12.6               | 0.93 (0.59-1.48)                           | 0.80 (0.49-1.28)           |
| Turkish                            | 6.7                | 5.4                 | 0.82 (0.29-2.32)           | 0.83 (0.28-2.50)                           | 3.9                       | 11.3               | <b>2.95 (1.03-8.48)</b>                    | <b>3.70 (1.16-11.8)</b>    |
| Moroccan                           | 5.1                | 9.3                 | 1.91 (0.87-4.18)           | <b>2.51 (1.09-5.75)</b>                    | 6.5                       | 8.6                | 1.34 (0.57-3.13)                           | 1.33 (0.55-3.20)           |
| Black                              | 5.1                | 4.3                 | 0.84 (0.34-2.07)           | 1.11 (0.42-2.93)                           | 4.7                       | 4.4                | 0.94 (0.21-4.20)                           | 0.87 (0.18-4.09)           |

<sup>1</sup>Adjusted for BMI, maternal age, years of education, ethnicity, smoking, alcohol <sup>2</sup>Excluded women with primary caesarean section. <sup>3</sup>Only women under primary care at start of labour  
<sup>4</sup>Excluded women with caesarean section; data available for 3530 women (only recorded in perinatal registry of midwives) <sup>5</sup>Excluded women with caesarean section (primary/ secondary)

1  
2  
3  
4  
5  
6 *General and pregnancy-related anxiety and level of care*  
7  
8

9 No statistically significant interactions were found between general or pregnancy-related  
10 anxiety with the level at care at the start of labour for any of the outcome measures (all p-  
11 values  $\geq 0.07$ ). However, in the subgroup analyses, the risk for pain relief/sedation was  
12 increased in highly anxious women who started labour in secondary care, only (general  
13 anxiety: OR 1.26; 95% CI 1.004-1.58; pregnancy-related anxiety: OR 1.81; 95% CI 1.33-2.45)  
14 compared to those who began labour in primary care (general anxiety: OR 1.09; 95% CI 0.84-  
15 1.40; pregnancy-related anxiety: OR 1.17; 95% CI 0.84-1.63). (Supplemental Table 1).  
16  
17  
18  
19  
20  
21  
22  
23  
24

25  
26 The subscale analyses showed that fear of labour was associated with pain relief/sedation,  
27 which was not the case of high 'fear of child'. (Supplemental table 4).  
28  
29  
30  
31  
32  
33  
34  
35  
36  
37  
38  
39  
40  
41  
42  
43  
44  
45  
46  
47  
48  
49  
50  
51  
52  
53  
54  
55  
56  
57  
58  
59  
60



## DISCUSSION

### Main findings

In this multi-ethnic cohort, general anxiety and pregnancy-related anxiety, as measured in the first half of pregnancy, were not associated with the progress of the birth process, but were associated with an increased risk for interventions during labour. Pregnancy-related anxiety showed stronger associations than general anxiety. Some associations differed between nulliparous and multiparous women, whereas largely similar associations were found across all ethnic groups.

### Strengths and limitations

A major strength of the present study is the prospective design in a large multi-ethnic cohort. Although the participation of non-Dutch women was lower than that of Dutch women, we collected data for  $\geq 2800$  non-Dutch women, making it possible to perform subgroup analyses in the four major ethnic groups in the Netherlands. However, the sample sizes were not large enough to prove a potential interaction effect of ethnicity and anxiety with less frequent outcomes. Although our sample might not be representative for all pregnant women in Amsterdam or in the Netherlands, there is no reason to assume that the association between anxiety and the birth process should be different in non-responders or in women with missing outcome data.

1  
2  
3 Another strength is the assessment of both general anxiety and pregnancy-related anxiety,  
4  
5 using validated questionnaires, while most other studies only assessed pregnancy-related  
6  
7 anxiety.  
8  
9

10 A limitation of the abbreviated 10-item version of the PRAQ that we used, is that this  
11  
12 questionnaire has only been validated in nulliparous women. Because one item of the 3-item  
13  
14 subscale 'fear of labour' was not applicable for multiparae, the assessment of this aspect in  
15  
16 multiparae was limited. Therefore, we used the total PRAQ score, but also performed  
17  
18 additional analyses to explore the aspects 'fear of labour' (only in nulliparous women) and  
19  
20 'fear of getting a handicapped child'. The use of the total PRAQ score is in agreement with  
21  
22 other questionnaires, such as the Wijma Delivery Expectancy Questionnaire (W-DEQ; a  
23  
24 frequently used questionnaire) conceptualized as a uni-dimensional instrument to measure  
25  
26 fear of childbirth.[47] Outcome data on the birth process and interventions were available  
27  
28 from the PRN, as well as from a questionnaire filled out three months after birth by the  
29  
30 mother. Combination of these two data sources resulted in a limited amount of missing data  
31  
32 within the group with outcome data available and there is no reason to assume that data  
33  
34 were missing in a selective manner. Since the collection of our data in 2003-2004, the  
35  
36 prevalence of interventions during labour has increased.[1-3, 48] Nevertheless, we think that  
37  
38 the associations between anxiety and the birth process have remained similar.  
39  
40  
41  
42  
43  
44  
45

46  
47 Anxiety was measured in the first half of pregnancy, while other studies measured anxiety  
48  
49 later in pregnancy.[16] Little evidence is available concerning how anxiety in the first half of  
50  
51 pregnancy persists and evolves during pregnancy, but in case of fear of childbirth/labour it  
52  
53 might be possible that fear will increase during pregnancy, because the event that is feared is  
54  
55 unavoidable and slowly coming closer. Moreover, assessment of anxiety in the first half of  
56  
57  
58  
59  
60

1  
2  
3 pregnancy provides the opportunity to perform an intervention to reduce anxiety, particularly  
4  
5 pregnancy-related anxiety.  
6  
7  
8  
9

### 10 11 **Comparison with other studies** 12

13  
14 The prevalence of high general anxiety was higher in our study than in other Dutch studies.  
15  
16 [49,50] This can be explained by the large proportion of women of non-Dutch origine in our  
17  
18 study.  
19  
20

21  
22 Some studies found no association between general anxiety and (interventions in) the birth  
23  
24 process [16,51] whereas Adams et al. were the only group to find a trend for increased risk for  
25  
26 labour induction in general anxious women in a cohort of 2206 women.[14] To our  
27  
28 knowledge, our study is the first to show a statistically significant association between general  
29  
30 anxiety and interventions during birth. The difference between our study and others might be  
31  
32 explained by a lack of power in other studies (including 88 and 1515 women, respectively), as  
33  
34 well as by different views on the management of labour, e.g. the use of pain relief. Moreover,  
35  
36 the other studies did not investigate the association between anxiety and labour induction, as  
37  
38 this is not considered to be an 'undesirable' outcome.  
39  
40  
41  
42  
43

44  
45 Our observed association between pregnancy-related anxiety and pain relief/sedation is in  
46  
47 line with other studies reporting an association between fear of labour and epidural  
48  
49 analgesia.[17, 52] Several studies found an association between fear of labour and elective  
50  
51 caesarean section.[18-21] Unfortunately, in our data elective caesarean was not coded, but  
52  
53 only primary caesarean. Although we found no association between general or pregnancy-  
54  
55 related anxiety and primary caesarean, except in the subgroup of Moroccan women, an  
56  
57  
58

1  
2  
3 interaction was seen between parity and general anxiety, suggesting a decreased risk for  
4  
5 primary caesarean in anxious nulliparae and an increased risk in anxious multiparae. This  
6  
7 might reflect the restraint of obstetricians in the Netherlands to perform an elective  
8  
9 caesarean in nulliparae. In anxious multiparae with a complicated birth history, obstetric  
10  
11 caregivers will be more willing to perform a caesarean section. Although others reported an  
12  
13 association between fear of labour and emergency caesarean section this was not seen in our  
14  
15 study.[15, 23]  
16  
17  
18  
19

20 Several studies found a longer duration of labour in women with high fear of labour.[14-16]  
21  
22 We did not find such an association with general or pregnancy-related anxiety, but we did find  
23  
24 an association with the PRAQ subscale 'fear of labour' within the subgroup of nulliparous  
25  
26 Dutch women. However, this result from an explorative analysis should be interpreted with  
27  
28 caution. Unfortunately, in our study, data on the duration of the first stage of labour were  
29  
30 only available in categories of six hours. Since we did not find an association with  
31  
32 augmentation during labour or artificial delivery, we think that an association with the  
33  
34 process of birth in our population is very unlikely.  
35  
36  
37  
38  
39

40 Subgroup analyses showed some different effects in nulliparae and multiparae. Parity is  
41  
42 known to be associated with the birth process, which was confirmed in the present study.[8,  
43  
44 10-11] The different effect of anxiety on interventions in the birth process in nulliparae and  
45  
46 multiparae can be explained by physiological factors, by the woman's experience during the  
47  
48 previous labour, resulting in more anxiety in women with a complicated previous labour, and  
49  
50 also by the information available for the care provider on the previous birth process. The  
51  
52 increased risk for induction of labour in multiparae with high general anxiety may be due to  
53  
54 greater confidence by obstetric caregivers that the induction will be successful in multiparae.  
55  
56  
57  
58  
59  
60

1  
2  
3 [53,54] An increased risk for referral during labour was only seen in nulliparous women with  
4  
5 high 'fear of labour', an aspect of pregnancy-related anxiety. This can be explained by the  
6  
7 lower a priori risk for referral in multiparae and the subsequent greater confidence of primary  
8  
9 care midwives in a successful delivery in primary care. To our knowledge, this is the first study  
10  
11 to investigate possible interactions with parity with regard to the impact of anxiety on the  
12  
13 birth process. More research is necessary to unravel the factors contributing to the different  
14  
15 effects of anxiety in nulliparous and multiparous women.  
16  
17  
18

19  
20 In contrast to our expectation, we found no stronger associations between general or  
21  
22 pregnancy-related anxiety in the non-Dutch groups compared to the Dutch group. However,  
23  
24 some indication was found for an increased risk for instrumental delivery in Turkish women  
25  
26 with high pregnancy-related anxiety, for Moroccan women with high general anxiety, and for  
27  
28 a lower risk for primary caesarean in highly anxious Moroccan women. It is unlikely that these  
29  
30 findings are explained by the lack of prenatal healthcare visits or language barriers, because  
31  
32 these factors are also seen among Moroccan and Surinamese women.[55] However, these  
33  
34 latter findings should be interpreted with caution as the subgroups were small; we  
35  
36 recommend more studies in large multi-ethnic cohorts to address these questions. The large  
37  
38 prevalence of high anxiety in non-Dutch women also justifies this research.  
39  
40  
41  
42

43  
44 Some indications were found that the odds for pain relief/sedation were especially increased  
45  
46 in anxious women who started labour in secondary care compared to primary care. This may  
47  
48 reflect that primary caregivers use different strategies to support anxious women during  
49  
50 labour.  
51

52  
53 It is reassuring that we found no association between general and pregnancy-related anxiety  
54  
55 and the progression of birth, but only with interventions. Another Dutch study showed that  
56  
57  
58

1  
2  
3 referral during labour, a significant intervention within the Dutch context, was associated with  
4  
5 a negative recall of labour three years later.[56] In 2013, the need for pain relief was the most  
6  
7 frequent reason (18.5%) for referral during labour.[57] Therefore, it is worthwhile to  
8  
9 investigate whether these interventions during labour can be managed by treatment or  
10  
11 therapy during pregnancy in anxious women, to avoid the necessity of labour-related  
12  
13 interventions. If effective treatments are identified, screening for anxiety (especially  
14  
15 pregnancy-related anxiety showing the strongest associations) should be implemented in  
16  
17 prenatal care, at least in subgroups with an increased risk for anxiety. The observed high  
18  
19 prevalence of general and pregnancy-related anxiety in non-Dutch women underlines the  
20  
21 relevance of screening and subsequent fear-reducing interventions, especially in this group.  
22  
23  
24  
25  
26

## 27 **Conclusion**

28  
29  
30 General and pregnancy-related anxiety in the first half of pregnancy are not associated with  
31  
32 prolonged or obstructed labour and artificial delivery and, therefore, do not appear to  
33  
34 influence the progression of birth. However, high levels of anxiety contribute to greater use  
35  
36 of interventions during labour, especially pain relief/sedation, induction of labour and  
37  
38 possibly referral during labour. Although we found similar associations between ethnic  
39  
40 groups, the high prevalence of anxiety symptoms in pregnant women with a migrant  
41  
42 background justifies more research on the effect of interventions to reduce anxiety symptoms  
43  
44 in ethnic groups.  
45  
46  
47  
48  
49

## 50 **ACKNOWLEDGEMENTS**

51  
52  
53 The authors would like to thank all participants of the ABCD study. We also thank Catherine  
54  
55 Barrett for developing the first design of the study.  
56  
57  
58  
59  
60

### COMPETING INTERESTS

None declared. Completed disclosure of interests form available to view online as supporting information.

### FUNDING

The ABCD-study was supported by the Academic Medical Centre, Amsterdam and the Public Health Services, Amsterdam. The present study was not funded by external sources.

### CONTRIBUTION TO AUTHORSHIP

The study was designed by JMK and TGV. JMK performed the statistical analysis and drafted the manuscript. TGV rendered and provided the ABCD Study data. JMK, TGV and AMS interpreted the results of the analysis. TGV and AMS made substantial contributions in revising the manuscript. The final manuscript was read and approved by all authors.

### DETAILS OF ETHICAL APPROVAL

Approval for the ABCD study was obtained from the Central Committee on Research involving Human Subjects in the Netherlands, the Medical Ethical Committees of participating hospitals, and from the Registration Committee of Amsterdam.

### DATA SHARING

Data of the ABCD study can be shared for specific research questions. Please contact [t.vrijkotte@amc.uva.nl](mailto:t.vrijkotte@amc.uva.nl).

1  
2  
3  
4  
5  
6  
7  
8  
9  
10  
11  
12  
13  
14  
15  
16  
17  
18  
19  
20  
21  
22  
23  
24  
25  
26  
27  
28  
29  
30  
31  
32  
33  
34  
35  
36  
37  
38  
39  
40  
41  
42  
43  
44  
45  
46  
47  
48  
49  
50  
51  
52  
53  
54  
55  
56  
57  
58  
59  
60

**LEGENDS OF FIGURES**

**Figure 1. Flowchart of the ABCD study and inclusion in the current analyses**

STAI = State Trait Anxiety Inventory

PRAQ = Pregnancy-Related Anxiety Questionnaire

PRN=Dutch Perinatal Registration

For peer review only



## REFERENCES

1. Kwee A, Elferink-Stinkens PM, Reuwer PJ, Bruinse HW. Trends in obstetric interventions in the Dutch obstetrical care system in the periode 1993-2002. *Eur J Obstet Gynec Reprod Biol* 2007;132:70-5.
2. Zhao Y, Zhang J, Hukkelhoven C, Offerhaus P, Zwart J, Jonge A de, Geerts C. Modest rise in caesarean section from 2000-2010: The Dutch experience. *Plos One* 2016;11(5):e0155565.
3. Dutch Perinatal Registration. Perinatal Care in the Netherlands 2013. Utrecht: Stichting Perinatale Registratie Nederland: Figure 4.1. Available from [http://www.perinatreg.nl/uploads/150/153/PRN\\_jaarboek\\_2013\\_09122014.pdf](http://www.perinatreg.nl/uploads/150/153/PRN_jaarboek_2013_09122014.pdf)
4. Brown HK, Hill J, Natale R. Caesarean section rates in Southwestern Ontario: changes over time after adjusting for important medical and social characteristics. *J Obstet Gynaecol Can* 2014;36:578-89.
5. Einarsdottir K, Haggard F, Pereira G, Leonard H, de Klerk N, Stanley FJ, Stock S. Role of public and private funding in the rising caesarean section rate: a cohort study. *BMJ Open* 2013;3:e002789.
6. Dahlen HG, Tracy S, Tracy M, Bisits A, Brown C, Thornton C. Rates of obstetric intervention among low-risk women giving birth in private and public hospitals in NSW: a population-based descriptive study. *BMJ Open* 2012;2:e001723.
7. Delbaere I, Cammu H, Martens E, Tency I, Martens G, Temmerman M. Limiting the caesarean section rate in low risk pregnancies is key to lowering the trend of increased abdominal deliveries: an observational study, *BMC Pregnancy Childbirth* 2012;12:3.
8. Schuit E, Kwee A, Westerhuis ME, van Dessel HJ, Graziosi GC, van Lith JM, Nijhuis JG, Oei SG, Oosterbaan HP, Schuitemaker NW, Wouters MG, Visser GH, Mol BW, Moons KG, Groenwold RH. A clinical prediction model to assess the risk of operative delivery. *BJOG* 2012;119:915-23.
9. Daemers DO, Wijnen HA, van Limbeek EB, Budé LM, Nieuwenhuijze MJ, Spaanderman ME, de Vries RG. The impact of obesity on outcomes of midwife-led pregnancy and childbirth in a primary care population: a prospective cohort study. *BJOG* 2014;121:1403-13.

10. Essex HN, Green J, Baston H, Pickett KE. Which women are at an increased risk of caesarean section or an instrumental vaginal birth in the UK: an exploration within the Millennium Cohort Study. *BJOG* 2013;120:732-42.
11. Sandall J, Soltani H, Gates S, Shennan A, Devane D. Midwife-led continuity models versus other models of care for childbearing women. *Cochrane Database Syst Rev.* 2013;8:CD004667.
12. Alder J, Fink N, Bitzer J, Hosli E, Holzgreve W. Depression and anxiety during pregnancy: a risk factor for obstetric, fetal and neonatal outcome? A critical review of the literature. *J Matern Fetal Neonatal Med* 2007;42:189-209.
13. Johnson R, Slade P. Obstetric complications and anxiety during pregnancy: is there a relationship? *J Psychosom Obstet Gynaecol* 2003;24:1-14.
14. Adams SS, Eberhard-Gran M, Eskild A. Fear of childbirth and duration of labour: a study of 2206 women with intended vaginal delivery. *BJOG* 2012;119:1238-46.
15. Laursen M, Johansen C, Hedegaard M. Fear of childbirth and risk for birth complications in nulliparous women in the Danish National Birth Cohort. *BJOG* 2009;116:1350-55.
16. Reck C, Zimmer K, Dubber S, Zipser B, Schlehe B, Gawlik S. The influence of general anxiety and childbirth-specific anxiety on birth outcome. *Arch Womens Ment Health* 2013;16:363-9.
17. Hall WA, Stoll K, Hutton EK, Brown H. A prospective study of effects of psychological factors and sleep on obstetric interventions, mode of birth, and neonatal outcomes among low-risk British Columbian women. *BMC Pregnancy Childbirth* 2012;3:78.
18. Melender HL. Fears and coping strategies associated with pregnancy and childbirth in Finland. *J Midwifery Womens Health* 2002;47:256-63.
19. Graham WJ, Hundley V, McCheyne AL, Hall MH, Gurney E, Milne J. An investigation of women's involvement in the decision to deliver by caesarean section. *BJOG* 1999;106:213-220.
20. Nieminen K, Stephansson O, Ryding EL. Women's fear of childbirth and preference for caesarean section--a cross-sectional study at various stages of pregnancy in Sweden. *Acta Obstet Gynecol Scand* 2009;88:807-813.
21. Handelzalts J, Fisher S, Lurie S, Golan A and Sadan O. Personality, fear of childbirth and caesarean delivery on demand. *Acta Obstet Gynecol Scand* 2012;92:16-21.

- 1  
2  
3 22. Ryding EL, Lukasse M, van Parys AS, Wangel AM, Karro H, Kristjansdottir H, Schroll AM, Schei B,  
4 Bidens Group. Fear of Childbirth and Risk of Cesarean Delivery: A cohort study in six European  
5 Countries. *Birth*. 2015;42:48-55.  
6  
7  
8  
9 23. Ryding EL, Wijma B, Wijma K, Rydhström H. Fear of childbirth during pregnancy may increase the  
10 risk of emergency caesarean section. *Acta Obstet Gynecol Scand* 1998;77:542-7.  
11  
12 24. Sluijs AM, Cleiren MP, Scherjon SA, Wijma K. No relationship between fear of childbirth and  
13 pregnancy-/delivery-outcome in a low-risk Dutch pregnancy cohort delivering at home or in  
14 hospital. *J Psychosom Obstet Gynaecol* 2012;33:99-105.  
15  
16  
17 25. Johnson R, Slade P. Does fear of childbirth during pregnancy predict emergency caesarean  
18 section? *BJOG* 2002;109:1213-1221.  
19  
20  
21 26. Fenwick J, Gamble J, Nathan E, Bayes S, Hauck Y. Pre- and postpartum levels of childbirth fear and  
22 the relationship to birth outcomes in a cohort of Australian women. *J Clin Nurs* 2009;18:667-677.  
23  
24 27. Giscombe CL, Lobel M. Explaining disproportionately high rates of adverse birth outcomes among  
25 African Americans: the impact of stress, racism, and related factors in pregnancy. *Psychol Bull*  
26 2005;131:662-83.  
27  
28 28. Barnes VA, Treiber FA, Musante L, Turner JR, Davis H, Strong WB. Ethnicity and socioeconomic  
29 status: impact on cardiovascular activity at rest and during stress in youth with a family history of  
30 hypertension. *Ethn Dis* 2000;10:4-16.  
31  
32 29. Dysart JM, Treiber FA, Pflieger K, Davis H, Strong WB. Ethnic differences in the myocardial and  
33 vascular reactivity to stress in normotensive girls. *Am J Hypertens* 1994;7:15-22.  
34  
35 30. Hogue CJ, Bremner JD. Stress model for research into preterm delivery among black women. *Am J*  
36 *Obstet Gynecol* 2005;192(5 Suppl):S47-55.  
37  
38 31. Schrier AC, de Wit MA, Coupé VM, Fassaert T, Verhoeff AP, Kupka RW, Dekker J, Beekman AT.  
39 Comorbidity of anxiety and depressive disorders: A comparative population study in Western and  
40 non-Western inhabitants in the Netherlands. *Int J Soc Psychiatry* 2012;58:186-194.  
41  
42 32. Garret PW, Dickson HG, Young L, Whelan AK. The Happy Migrant Effect": perceptions of negative  
43 experiences of healthcare by patients with little or no English: a qualitative study across seven  
44 language groups. *Qual Saf Health Care* 2008;17:101-3.  
45  
46  
47  
48  
49  
50  
51  
52  
53  
54  
55  
56  
57  
58  
59  
60

- 1  
2  
3 33. Lindert J, von Ehrenstein OS, Priebe S, Mielck A, Brähler E. Depression and anxiety in labour  
4 migrants and refugees- A systematic review and meta-analysis. *Soc Sci Med* 2009;69:246–257.  
5  
6  
7 34. Levecque K, Lodewyckx I, Vranken J. Depression and generalised anxiety in the general population  
8 in Belgium: A comparison between native and immigrant groups. *J Affect Disord* 2007;97:229–39.  
9  
10  
11 35. Dunkel Schetter C and Tanner L. Anxiety, depression and stress in pregnancy: Implications for  
12 mothers, children, research and practice. *Curr.. Opin. Psychiatry* 2012;25:141-148  
13  
14  
15 36. Glynn LM, Schetter CD, Hobel CJ, Sandman CA. *Health Psychology* 2008;27:43-51.  
16  
17 37. VandenBergh BR, Mulder EJ, Mennes M, Glover V. Antenatal maternal anxiety and stress and the  
18 neurobehavioural development of the fetus and child: links and possible mechanisms. A review.  
19 *Neurosci Biobehav. Rev* 2005;29:237-58.  
20  
21  
22 38. Eijsden M van, Vrijkotte TGM, Gemke RJ, Wal MF van der. Cohort Profile: The Amsterdam Born  
23 Children and their Development (ABCD) Study. *Int J Epidemiol* 2011;40: 1176-1186  
24  
25  
26 39. Tromp M, van Eijsden M, Ravelli AC, Bonsel GJ. Anonymous non-response analysis in the ABCD  
27 cohort study enabled by probabilistic record linkage. *Paediatr Perinat Epidemiol.* 2009;23:264-72.  
28  
29  
30 40. Ploeg HM van der, Defares PB, Spielberger CD. [Een nederlandstalige bewerking van de  
31 Spielberger State-Trait Anxiety Inventory: de Zelf-Beoordelings Vragenlijst] *De Psycholoog*  
32 1980;15:460–467. [Article in Dutch]  
33  
34  
35  
36 41. Spielberger CD, Gorsuch RL, Lushene RE. STAI Manual for the State-Trait Anxiety Inventory. Palo  
37 Alto, California (USA): Consulting Psychologists Press 1970.  
38  
39  
40  
41  
42 42. Mennes M, Stiers P, Lagae L, van den Bergh B. Long-term cognitive sequelae of antenatal  
43 maternal anxiety: involvement of the orbitofrontal cortex. *Neurosci Biobehav Rev* 2006;30:1078-  
44 86.  
45  
46  
47  
48 43. Huizink AC, Mulder EJ, Robles de Medina PG, Visser GH, Buitelaar JK. Is pregnancy anxiety a  
49 distinctive syndrome? *Early Hum Dev* 2004;79:81–91.  
50  
51  
52 44. Bergh BRH van den. The influence of maternal emotions during pregnancy on fetal and neonatal  
53 behavior. *Pre- and Perinatal Psychology J* 1990;5:119–13  
54  
55  
56 45. Loomans E, van Dijk A, Vrijkotte T, van Eijsden M, Stronks K, Gemke R and van den Berg B.  
57  
58  
59  
60

- 1  
2  
3 Psychosocial stress during pregnancy is related to adverse birth outcomes: results from a large  
4 multi-ethnic community-based birth cohort. *Eur J Public Health* 2013;23:485-91.  
5  
6  
7 46. Goossen-Baremans A. Consensusdocument beslisregels dataset PRN. Versie 0.99. Utrecht:  
8 Stichting Perinatale Registratie Nederland. 2009. Available from  
9 <http://www.perinatreg.nl/publicaties?noCache=602;1459936592> [Dutch]  
10  
11  
12 47. Wijma K, Wijma B, Zar M. Psychometric aspects of the W-DEQ: a new questionnaire for the  
13 measurement of fear of childbirth. *J Psychosom Obstet Gynaecol* 1998;19:84-97.  
14  
15 48. Amelink-Verburg MP, Rijnders ME, Buitendijk SE. A trend analysis in referrals during pregnancy  
16 and labour in Dutch midwifery care 1988-2004. *BJOG* 2009;116:923-32.  
17  
18  
19 49. Koelewijn JM, Vrijkotte TGM, De Haas M, Van der Schoot CE, Bonsel GJ. Women's attitude towards  
20 prenatal screening for red blood cell antibodies, other than RhD. *BMC Pregnancy and Childbirth*  
21 2008;8:49.  
22  
23  
24 50. Fontein-Kuipers YM, Ausems M, Budé L, Van Limbeek E, De Vries R, Nieuwenhuijze M. Factors  
25 influencing maternal distress among Dutch women with a healthy pregnancy. *Women and Birth*  
26 2015;28:e36043.  
27  
28  
29 51. Perkin MR, Bland JM, Peacock, JL, Anderson HR. The effect of anxiety and depression during  
30 pregnancy on obstetric complications. *BJOG* 1993;100:629-634.  
31  
32  
33 52. Thomson, M., Hanley, J. Factors predisposing to difficult labour in primiparas. *Am J Obstet Gynecol*  
34 1988;158:1074-1078.  
35  
36  
37 53. Bricker L, Luckas M. Amniotomy alone for induction of labour. *Cochrane Database of Systematic*  
38 *Reviews* 2000, Issue 4. Art.no.: CD002862  
39  
40  
41 54. Howarth G, Botha DJ. Amniotomy plus intravenous oxytocin for induction of labour. *Cochrane*  
42 *Database of Systematic Reviews* 2001, Issue 3. Art. No.: CD003250.  
43  
44  
45 55. Alderliesten ME, Vrijkotte TG, van der Wal MF, Bonsel GJ. Late start of antenatal care among  
46 ethnic minorities in a large cohort of pregnant women. *BJOG* 2007;114(10):1232-9.  
47  
48  
49 56. Rijnders M, Baston H, Prins M, Schonbeck Y, vd Pal K, Green J, Buitendijk S. Perinatal factors  
50 related to negative or positive recall of birth experience, in women three years postpartum in the  
51 Netherlands. *Birth* 2008;35:107-16  
52  
53  
54  
55  
56  
57  
58  
59  
60

1  
2  
3  
4  
5  
6  
7  
8  
9  
10  
11  
12  
13  
14  
15  
16  
17  
18  
19  
20  
21  
22  
23  
24  
25  
26  
27  
28  
29  
30  
31  
32  
33  
34  
35  
36  
37  
38  
39  
40  
41  
42  
43  
44  
45  
46  
47  
48  
49  
50  
51  
52  
53  
54  
55  
56  
57  
58  
59  
60

57. Dutch Perinatal Registration. Perinatal Care in the Netherlands 2013. [Internet] Utrecht: Stichting Perinatale Registratie Nederland 2014, Table 9.3.1. Available from [http://www.perinatreg.nl/uploads/150/153/PRN\\_jaarboek\\_2013\\_09122014.pdf](http://www.perinatreg.nl/uploads/150/153/PRN_jaarboek_2013_09122014.pdf) [Dutch]

For peer review only

1  
2  
3  
4  
5  
6  
7  
8  
9  
10  
11  
12  
13  
14  
15  
16  
17  
18  
19  
20  
21  
22  
23  
24  
25  
26  
27  
28  
29  
30  
31  
32  
33  
34  
35  
36  
37  
38  
39  
40  
41  
42  
43  
44  
45  
46  
47  
48  
49  
50  
51  
52  
53  
54  
55  
56  
57  
58  
59  
60

**Figure 1. Flowchart of the ABCD study and inclusion in the current analyses**

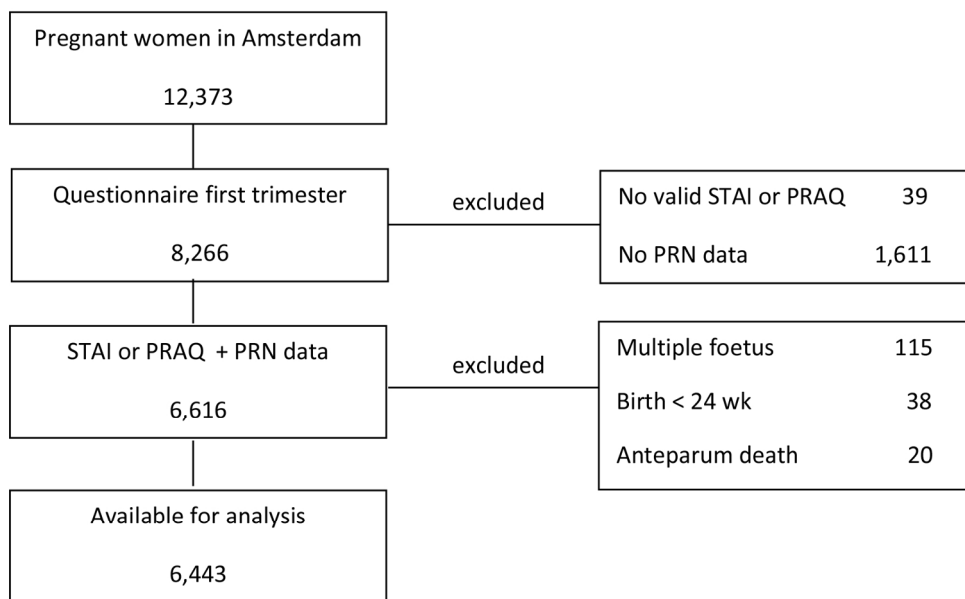

STAI = State Trait Anxiety Inventory

PRAQ = Pregnancy-Related Anxiety Questionnaire

PRN = Dutch Perinatal Registration

153x141mm (300 x 300 DPI)

only

**Supplemental Table 1. Univariable and multivariable associations between first trimester general and pregnancy related anxiety and (interventions in) the birth process, according to care at start of labour**

| Outcome                            | General anxiety    |                     |                            |                                            | Pregnancy-related anxiety |                    |                            |                                            |
|------------------------------------|--------------------|---------------------|----------------------------|--------------------------------------------|---------------------------|--------------------|----------------------------|--------------------------------------------|
|                                    | Low<br>n=4126<br>% | High<br>n=1850<br>% | Crude model<br>OR (95% CI) | Adjusted model <sup>1</sup><br>OR (95% CI) | Low<br>n=5348<br>%        | High<br>n=662<br>% | Crude model<br>OR (95% CI) | Adjusted model <sup>1</sup><br>OR (95% CI) |
| Augmentation <sup>2</sup>          |                    |                     |                            |                                            |                           |                    |                            |                                            |
| primary care                       | 19.7               | 19.4                | 1.00 (0.84-1.20)           | 1.01 (0.83-1.24)                           | 19.4                      | 21.8               | 1.17 (0.91-1.52)           | 0.96 (0.73-1.27)                           |
| secondary care                     | 34.7               | 27.7                | 0.73 (0.61-0.89)           | 0.83 (0.67-1.02)                           | 32.4                      | 31.8               | 0.98 (0.74-1.30)           | 0.95 (0.70-1.28)                           |
| Pain relief/sedation <sup>2</sup>  |                    |                     |                            |                                            |                           |                    |                            |                                            |
| primary care                       | 10.5               | 11.3                | 1.10 (0.88-1.38)           | 1.09 (0.84-1.40)                           | 10.4                      | 13.9               | <b>1.45 (1.06-1.98)</b>    | 1.17 (0.84-1.63)                           |
| secondary care                     | 22.6               | 24.6                | 1.12 (0.91-1.37)           | <b>1.26 (1.004-1.58)</b>                   | 21.9                      | 33.7               | <b>1.85 (1.40-2.45)</b>    | <b>1.81 (1.33-2.45)</b>                    |
| Secondary caesarean <sup>2</sup>   |                    |                     |                            |                                            |                           |                    |                            |                                            |
| primary care                       | 4.9                | 4.6                 | 0.96 (0.68-1.34)           | 0.91 (0.63-1.31)                           | 4.7                       | 5.8                | 1.23 (0.78-1.95)           | 0.97 (0.60-1.58)                           |
| secondary care                     | 19.2               | 16.6                | 0.91 (0.72-1.15)           | 0.94 (0.73-1.21)                           | 17.4                      | 19.5               | 1.16 (0.83-1.61)           | 1.16 (0.82-1.65)                           |
| First stage >12 hr <sup>3</sup>    |                    |                     |                            |                                            |                           |                    |                            |                                            |
| primary care                       | 19.4               | 19.8                | 1.03 (0.85-1.24)           | 1.04 (0.84-1.29)                           | 19.2                      | 22.1               | 1.23 (0.94-1.62)           | 0.99 (0.73-1.33)                           |
| secondary care                     | 21.2               | 28.6                | 1.55 (0.65-3.68)           | 1.80 (0.65-5.02)                           | 23.6                      | 12.5               | 0.48 (0.06-4.03)           | 0.30 (0.03-3.43)                           |
| Second stage >=90 min <sup>4</sup> |                    |                     |                            |                                            |                           |                    |                            |                                            |
| primary care                       | 11.3               | 8.0                 | 0.69 (0.53-0.90)           | 0.90 (0.67-1.21)                           | 10.4                      | 10.3               | 0.95 (0.65-1.37)           | 0.97 (0.65-1.45)                           |
| secondary care                     | 10.7               | 5.8                 | 0.51 (0.34-0.74)           | 0.77 (0.51-1.16)                           | 9.3                       | 6.7                | 0.72 (0.41-1.28)           | 0.93 (0.51-1.70)                           |
| Instrumental delivery <sup>4</sup> |                    |                     |                            |                                            |                           |                    |                            |                                            |
| primary care                       | 9.7                | 8.2                 | 0.85 (0.65-1.10)           | 1.05 (0.78-1.39)                           | 9.1                       | 10.2               | 1.13 (0.78-1.62)           | 1.08 (0.73-1.59)                           |
| secondary care                     | 18.4               | 12.8                | 0.66 (0.50-0.87)           | 0.97 (0.71-1.30)                           | 16.7                      | 12.9               | 0.72 (0.47-1.11)           | 0.87 (0.55-1.38)                           |

<sup>1</sup>Adjusted for BMI, maternal age, years of education, ethnicity, smoking, alcohol <sup>2</sup>Excluded women with primary caesarean section <sup>3</sup>Excluded women with caesarean section; data available for 3530 women (only recorded in perinatal registry of midwives) <sup>4</sup>Excluded women with caesarean section (primary/secondary)



Supplemental table 2a. Univariable and multivariable associations between PRAQ fear of labour and PRAQ fear of child in the first half of pregnancy and (interventions in) the birth process, according to parity

| Outcome                             | Pregnancy Related Anxiety, according to Pregnancy Related Anxiety Questionnaire (PRAQ) |                            |                            |                                            |                            |                             |                            |                                            |
|-------------------------------------|----------------------------------------------------------------------------------------|----------------------------|----------------------------|--------------------------------------------|----------------------------|-----------------------------|----------------------------|--------------------------------------------|
|                                     | Fear of labour, only in <u>nulliparimiparae</u>                                        |                            |                            |                                            | Fear of handicapped child  |                             |                            |                                            |
|                                     | Low (3-9)<br>n=3021<br>%                                                               | High (10-12)<br>n=574<br>% | Crude model<br>OR (95% CI) | Adjusted model <sup>1</sup><br>OR (95% CI) | Low (4-11)<br>n=5727*<br>% | High (12-16)<br>n=683*<br>% | Crude model<br>OR (95% CI) | Adjusted model <sup>1</sup><br>OR (95% CI) |
| Primary caesarean                   |                                                                                        |                            |                            |                                            |                            |                             |                            |                                            |
| Nulliparae                          | 5.2                                                                                    | 4.6                        | 0.89 (0.58-1.37)           | 1.26 (0.79-2.01)                           | 5.0                        | 5.4                         | 1.05 (0.65-1.69)           | 1.16 (0.72-1.88)                           |
| Multiparae                          |                                                                                        |                            |                            |                                            | 5.7                        | 8.7                         | <b>1.58 (1.00-2.48)</b>    | <b>1.69 (1.06-2.69)</b>                    |
| Induction <sup>2</sup>              |                                                                                        |                            |                            |                                            |                            |                             |                            |                                            |
| Nulliparae                          | 11.6                                                                                   | 13.3                       | 1.18 (0.90-1.56)           | 1.27 (0.93-1.72)                           | 11.6                       | 13.8                        | 1.16 (0.84-1.61)           | 1.19 (0.86-1.66)                           |
| Multiparae                          |                                                                                        |                            |                            |                                            | 9.7                        | 13.0                        | 1.40 (0.95-2.07)           | 1.33 (0.88-2.00)                           |
| Referral during labour <sup>3</sup> |                                                                                        |                            |                            |                                            |                            |                             |                            |                                            |
| Nulliparae                          | 51.3                                                                                   | 57.6                       | 1.36 (1.07-1.74)           | <b>1.39 (1.06-1.81)</b>                    | 51.7                       | 57.5                        | 1.31 (0.98-1.75)           | 1.31 (0.98-1.76)                           |
| Multiparae                          |                                                                                        |                            |                            |                                            | 20.7                       | 16.7                        | 0.79 (0.50-1.25)           | 0.71 (0.45-1.14)                           |
| Augmentation <sup>2</sup>           |                                                                                        |                            |                            |                                            |                            |                             |                            |                                            |
| Nulliparae                          | 33.5                                                                                   | 36.2                       | 1.15 (0.95-1.40)           | 1.15 (0.93-1.43)                           | 34.1                       | 32.6                        | 0.94 (0.74-1.19)           | 0.94 (0.74-1.19)                           |
| Multiparae                          |                                                                                        |                            |                            |                                            | 12.4                       | 11.2                        | 0.90 (0.59-1.35)           | 0.85 (0.56-1.30)                           |
| Pain relief/sedation <sup>2</sup>   |                                                                                        |                            |                            |                                            |                            |                             |                            |                                            |
| Nulliparae                          | 21.4                                                                                   | 30.8                       | 1.70 (1.38-2.09)           | <b>1.58 (1.26-1.99)</b>                    | 22.5                       | 25.8                        | 1.22 (0.95-1.57)           | 1.14 (0.88-1.47)                           |
| Multiparae                          |                                                                                        |                            |                            |                                            | 6.0                        | 6.2                         | 0.93 (0.53-1.65)           | 0.94 (0.53-1.67)                           |
| Secondary caesarean <sup>2</sup>    |                                                                                        |                            |                            |                                            |                            |                             |                            |                                            |
| Nulliparae                          | 12.5                                                                                   | 13.4                       | 1.12 (0.85-1.47)           | 1.02 (0.75-1.37)                           | 12.3                       | 14.8                        | 1.27 (0.93-1.73)           | 1.30 (0.95-1.79)                           |
| Multiparae                          |                                                                                        |                            |                            |                                            | 5.9                        | 5.8                         | 0.98 (0.56-1.73)           | 1.03 (0.58-1.84)                           |

1  
2  
3  
4  
5  
6  
7  
8  
9  
10  
11  
12  
13  
14  
15  
16  
17  
18  
19  
20  
21  
22  
23  
24  
25  
26  
27  
28  
29  
30  
31  
32  
33  
34  
35  
36  
37  
38  
39  
40  
41  
42  
43  
44  
45  
46  
47  
48  
49

|                                    |      |      |                         |                  |      |      |                  |                  |
|------------------------------------|------|------|-------------------------|------------------|------|------|------------------|------------------|
| First stage >12 hr <sup>4</sup>    |      |      |                         |                  |      |      |                  |                  |
| Nulliparae                         | 30.3 | 36.1 | <b>1.34 (1.03-1.73)</b> | 1.14 (0.86-1.53) | 31.0 | 32.2 | 1.10 (0.81-1.51) | 1.03 (0.75-1.42) |
| Multiparae                         |      |      |                         |                  | 4.9  | 2.1  | 0.45 (0.14-1.45) | 0.44 (0.14-1.43) |
| Second stage >=90 min <sup>5</sup> |      |      |                         |                  |      |      |                  |                  |
| Nulliparae                         | 17.3 | 14.4 | 0.83 (0.62-1.10)        | 1.14 (0.83-1.57) | 17.3 | 12.8 | 0.71 (0.50-1.01) | 0.77 (0.54-1.11) |
| Multiparae                         |      |      |                         |                  | 1.6  | 0.8  | 0.53 (0.13-2.20) | 0.53 (0.13-2.23) |
| Instrumental delivery <sup>5</sup> |      |      |                         |                  |      |      |                  |                  |
| Nulliparae                         | 19.2 | 17.3 | 0.90 (0.69-1.17)        | 1.17 (0.88-1.57) | 19.3 | 15.4 | 0.74 (0.54-1.03) | 0.80 (0.57-1.11) |
| Multiparae                         |      |      |                         |                  | 3.2  | 2.0  | 0.66 (0.26-1.65) | 0.69 (0.28-1.75) |

<sup>1</sup>Adjusted for BMI, maternal age, years of education, ethnicity, smoking, alcohol <sup>2</sup>Excluded women with primary caesarean section. <sup>3</sup>Only women under primary care at start of labour  
<sup>4</sup>Excluded women with caesarean section; data available for 3535 women (only recorded in perinatal registry of midwives) <sup>5</sup>Excluded women with caesarean section (primary/ secondary)  
 \*Including four respondents how did not complete the total PRAQ, but who completed the subscale 'fear of child'.

Supplemental table 3a. Univarible and multivariable associations between PRAQ fear of labour and PRAQ fear of child in the first half of pregnancy and (interventions in) the birth process, according to ethnicity

| Outcome                             | Fear of labour, only in nulliparae |                            |                            |                                            | Fear of handicapped child  |                             |                            |                                            |
|-------------------------------------|------------------------------------|----------------------------|----------------------------|--------------------------------------------|----------------------------|-----------------------------|----------------------------|--------------------------------------------|
|                                     | Low (3-9)<br>n=3021<br>%           | High (10-12)<br>n=574<br>% | Crude model<br>OR (95% CI) | Adjusted model <sup>1</sup><br>OR (95% CI) | Low (4-11)<br>n=5727*<br>% | High (12-16)<br>n=683*<br>% | Crude model<br>OR (95%-CI) | Adjusted model <sup>1</sup><br>OR (95%-CI) |
| Primary caesarean                   |                                    |                            |                            |                                            |                            |                             |                            |                                            |
| Dutch                               | 5.9                                | 5.2                        | 0.91 (0.44-1.91)           | 0.98 (0.46-2.06)                           | 5.8                        | 7.1                         | 1.25 (0.79-1.97)           | 1.20 (0.75-1.90)                           |
| Turkish                             | 0.0                                | 3.4                        | p=0.19                     | p=1.00                                     | 3.8                        | 1.8                         | 0.56 (0.07-4.59)           | 0.59 (0.06-5.33)                           |
| Moroccan                            | 2.3                                | 3.2                        | 1.40 (0.28-7.09)           | 1.33 (0.26-6.82)                           | 3.3                        | 3.8                         | 1.16 (0.32-4.18)           | 1.34 (0.37-4.92)                           |
| Black                               | 6.9                                | 1.4                        | 0.25 (0.03-1.97)           | 0.50 (0.06-4.33)                           | 5.7                        | 4.7                         | 0.43 (0.06-3.27)           | 0.61 (0.08-4.69)                           |
| Induction <sup>2</sup>              |                                    |                            |                            |                                            |                            |                             |                            |                                            |
| Dutch                               | 11.7                               | 14.5                       | 1.33 (0.82-2.17)           | 1.29 (0.78-2.13)                           | 10.5                       | 13.8                        | 1.37 (0.96-1.94)           | 1.31 (0.91-1.90)                           |
| Turkish                             | 13.3                               | 14.3                       | 1.01 (0.35-2.91)           | 1.08 (0.36-3.27)                           | 12.3                       | 16.1                        | 1.24 (0.51-3.06)           | 1.31 (0.51-3.35)                           |
| Moroccan                            | 7.1                                | 14.4                       | 2.20 (0.89-5.39)           | 2.41 (0.96-6.05)                           | 9.7                        | 10.5                        | 0.98 (0.42-2.29)           | 1.02 (0.43-2.43)                           |
| Black                               | 11.7                               | 14.5                       | 1.28 (0.54-3.01)           | 1.44 (0.58-3.61)                           | 10.4                       | 9.8                         | 0.73 (0.22-2.46)           | 0.85 (0.24-2.30)                           |
| Referral during labour <sup>3</sup> |                                    |                            |                            |                                            |                            |                             |                            |                                            |
| Dutch                               | 49.9                               | 62.0                       | <b>1.78 (1.13-2.80)</b>    | <b>1.94 (1.22-3.10)</b>                    | 36.3                       | 42.0                        | 1.27 (0.91-1.76)           | 1.17 (0.82-1.68)                           |
| Turkish                             | 47.7                               | 59.4                       | 1.58 (0.61-4.10)           | 1.45 (0.53-3.99)                           | 39.4                       | 32.4                        | 0.86 (0.38-1.96)           | 0.67 (0.27-1.65)                           |
| Moroccan                            | 57.3                               | 67.7                       | 1.52 (0.76-3.04)           | 1.63 (0.80-3.32)                           | 45.2                       | 43.5                        | 0.95 (0.50-1.82)           | 1.00 (0.49-2.02)                           |
| Black                               | 52.8                               | 35.0                       | 0.49 (0.23-1.07)           | 0.54 (0.23-1.27)                           | 38.8                       | 41.4                        | 1.17 (0.53-2.59)           | 1.14 (0.48-2.68)                           |
| Augmentation <sup>2</sup>           |                                    |                            |                            |                                            |                            |                             |                            |                                            |

|    |                                    |      |      |                         |                                     |      |      |                         |                          |
|----|------------------------------------|------|------|-------------------------|-------------------------------------|------|------|-------------------------|--------------------------|
| 1  |                                    |      |      |                         |                                     |      |      |                         |                          |
| 2  |                                    |      |      |                         |                                     |      |      |                         |                          |
| 3  |                                    |      |      |                         |                                     |      |      |                         |                          |
| 4  |                                    |      |      |                         |                                     |      |      |                         |                          |
| 5  | Dutch                              | 32.3 | 37.9 | 1.35 (0.95-1.92)        | 1.42 (0.99-2.04)                    | 23.4 | 27.8 | 1.25 (0.95-1.64)        | 1.17 (0.88-1.56)         |
| 6  | Turkish                            | 30.7 | 32.1 | 1.01 (0.47-2.15)        | 0.90 (0.41-2.00)                    | 23.0 | 17.9 | 0.64 (0.28-1.46)        | 0.58 (0.25-1.37)         |
| 7  | Moroccan                           | 37.3 | 33.3 | 0.81 (0.46-1.44)        | 0.87 (0.48-1.57)                    | 24.7 | 19.7 | 0.79 (0.43-1.47)        | 0.78 (0.41-1.49)         |
| 8  | Black                              | 28.9 | 30.9 | 1.10 (0.58-2.06)        | 1.10 (0.56-2.14)                    | 22.5 | 15.0 | 0.63 (0.26-1.54)        | 0.58 (0.23-1.48)         |
| 9  |                                    |      |      |                         |                                     |      |      |                         |                          |
| 10 | Pain relief/ sedation <sup>2</sup> |      |      |                         |                                     |      |      |                         |                          |
| 11 |                                    |      |      |                         |                                     |      |      |                         |                          |
| 12 |                                    |      |      |                         |                                     |      |      |                         |                          |
| 13 | Dutch                              | 19.4 | 34.5 | <b>2.29 (1.59-3.30)</b> | <b>2.17 (1.49-3.15)<sup>6</sup></b> | 14.2 | 19.1 | <b>1.42 (1.04-1.94)</b> | 1.36 (0.99-1.87)         |
| 14 | Turkish                            | 32.0 | 23.2 | 0.69 (0.31-1.54)        | 0.71 (0.30-1.66) <sup>6</sup>       | 15.5 | 16.1 | 1.10 (0.47-2.56)        | 1.15 (0.48-2.76)         |
| 15 | Moroccan                           | 23.0 | 24.4 | 1.01 (0.53-1.91)        | 1.03 (0.53-2.00) <sup>6</sup>       | 13.9 | 14.5 | 1.07 (0.53-2.17)        | 1.00 (0.49-2.06)         |
| 16 | Black                              | 23.3 | 32.4 | 1.58 (0.84-3.00)        | 1.86 (0.94-3.69) <sup>6</sup>       | 15.0 | 10.0 | 0.65 (0.22-1.89)        | 0.50 (0.17-1.50)         |
| 17 |                                    |      |      |                         |                                     |      |      |                         |                          |
| 18 | Secondary caesarean <sup>2</sup>   |      |      |                         |                                     |      |      |                         |                          |
| 19 |                                    |      |      |                         |                                     |      |      |                         |                          |
| 20 |                                    |      |      |                         |                                     |      |      |                         |                          |
| 21 | Dutch                              | 11.0 | 13.1 | 1.19 (0.71-2.00)        | 1.15 (0.67-1.96)                    | 8.6  | 12.2 | <b>1.47 (1.01-2.14)</b> | 1.38 (0.94-2.03)         |
| 22 | Turkish                            | 10.7 | 10.7 | 0.97 (0.32-1.98)        | 0.91 (0.28-2.98)                    | 7.1  | 8.9  | 1.55 (0.53-4.48)        | 1.63 (0.53-5.04)         |
| 23 | Moroccan                           | 15.9 | 10.0 | 0.58 (0.25-1.35)        | 0.59 (0.25-1.42)                    | 8.9  | 9.2  | 1.11 (0.47-2.62)        | 1.22 (0.50-2.99)         |
| 24 | Black                              | 20.1 | 14.7 | 0.72 (0.33-1.58)        | 0.84 (0.37-1.91)                    | 12.8 | 7.5  | 0.58 (0.17-2.00)        | 0.65 (0.19-2.28)         |
| 25 |                                    |      |      |                         |                                     |      |      |                         |                          |
| 26 | First stage >12 hr <sup>4</sup>    |      |      |                         |                                     |      |      |                         |                          |
| 27 |                                    |      |      |                         |                                     |      |      |                         |                          |
| 28 |                                    |      |      |                         |                                     |      |      |                         |                          |
| 29 | Dutch                              | 27.8 | 37.8 | <b>1.64 (1.03-2.62)</b> | <b>1.64 (1.02-2.64)</b>             | 17.8 | 21.9 | 1.30 (0.88-1.92)        | 1.25 (0.82-1.90)         |
| 30 | Turkish                            | 34.9 | 29.0 | 0.80 (0.29-2.20)        | 0.55 (0.17-1.77)                    | 19.1 | 9.4  | 0.49 (0.14-1.76)        | <b>0.24 (0.06-0.996)</b> |
| 31 | Moroccan                           | 35.2 | 35.0 | 0.96 (0.48-1.92)        | 0.96 (0.46-1.99)                    | 20.3 | 20.0 | 1.02 (0.46-2.26)        | 1.00 (0.41-2.43)         |
| 32 | Black                              | 30.5 | 32.3 | 1.07 (0.44-2.59)        | 1.11 (0.43-2.89)                    | 21.0 | 19.2 | 0.94 (0.33-2.67)        | 1.04 (0.32-3.42)         |
| 33 |                                    |      |      |                         |                                     |      |      |                         |                          |
| 34 | Second stage >=90 min <sup>5</sup> |      |      |                         |                                     |      |      |                         |                          |
| 35 |                                    |      |      |                         |                                     |      |      |                         |                          |
| 36 | Dutch                              | 18.5 | 24.2 | 1.42 (0.91-2.19)        | <b>1.64 (1.05-2.57)</b>             | 12.0 | 10.0 | 0.82 (0.53-1.25)        | 0.80 (0.51-1.25)         |
| 37 |                                    |      |      |                         |                                     |      |      |                         |                          |
| 38 |                                    |      |      |                         |                                     |      |      |                         |                          |
| 39 |                                    |      |      |                         |                                     |      |      |                         |                          |
| 40 |                                    |      |      |                         |                                     |      |      |                         |                          |
| 41 |                                    |      |      |                         |                                     |      |      |                         |                          |
| 42 |                                    |      |      |                         |                                     |      |      |                         |                          |
| 43 |                                    |      |      |                         |                                     |      |      |                         |                          |
| 44 |                                    |      |      |                         |                                     |      |      |                         |                          |
| 45 |                                    |      |      |                         |                                     |      |      |                         |                          |
| 46 |                                    |      |      |                         |                                     |      |      |                         |                          |
| 47 |                                    |      |      |                         |                                     |      |      |                         |                          |
| 48 |                                    |      |      |                         |                                     |      |      |                         |                          |
| 49 |                                    |      |      |                         |                                     |      |      |                         |                          |

|                                    |      |      |                         |                         |      |     |                  |                         |
|------------------------------------|------|------|-------------------------|-------------------------|------|-----|------------------|-------------------------|
| Turkish                            | 9.1  | 12.8 | 1.75 (0.50-6.15)        | 1.93 (0.51-7.30)        | 5.3  | 6.1 | 1.43 (0.38-5.44) | 1.13 (0.28-4.59)        |
| Moroccan                           | 16.2 | 8.8  | 0.41 (0.15-1.08)        | 0.43 (0.16-1.17)        | 7.1  | 2.9 | 0.41 (0.10-1.80) | 0.43 (0.10-1.93)        |
| Black                              | 4.9  | 5.9  | 1.24 (0.30-5.17)        | 0.88 (0.18-4.29)        | 3.0  | 5.6 | 1.96 (0.42-9.21) | 1.40 (0.27-7.19)        |
| Instrumental delivery <sup>5</sup> |      |      |                         |                         |      |     |                  |                         |
| Dutch                              | 20.4 | 19.0 | 0.95 (0.60-1.50)        | 1.03 (0.64-1.65)        | 13.6 | 9.5 | 0.66 (0.43-1.02) | <b>0.61 (0.39-0.96)</b> |
| Turkish                            | 9.0  | 18.0 | 1.87 (0.60-5.80)        | 2.37 (0.69-8.12)        | 5.7  | 7.8 | 1.17 (0.32-4.34) | 1.17 (0.29-4.71)        |
| Moroccan                           | 13.2 | 11.1 | 0.81 (0.33-1.98)        | 0.84 (0.34-2.09)        | 7.2  | 5.8 | 0.80 (0.27-2.37) | 0.85 (0.28-2.61)        |
| Black                              | 5.5  | 13.8 | <b>2.93 (1.01-8.55)</b> | <b>3.22 (1.03-10.1)</b> | 4.6  | 5.4 | 1.20 (0.27-5.41) | 0.96 (0.20-4.65)        |

<sup>1</sup>Adjusted for BMI, maternal age, years of education, ethnicity, smoking, alcohol, parity (only in fear of handicapped child) <sup>2</sup>Excluded women with primary caesarean section. <sup>3</sup>Only women under primary care at start of labour <sup>4</sup>Excluded women with caesarean section; data available for 3530 women (only recorded in perinatal registry of midwives) <sup>5</sup>Excluded women with caesarean section (primary/ secondary) <sup>6</sup> interaction ethnicity and fear of labour p=0.03

\*Including four respondents who did not complete the total PRAQ, but who completed the subscale 'fear of child'.

**Supplemental table 4. Univariable and multivariable associations between PRAQ fear of labour and PRAQ fear of child in the first half of pregnancy and (interventions in) the birth process, according to care at start of labour**

| Outcome                            | Pregnancy Related Anxiety, according to Pregnancy Related Anxiety Questionnaire (PRAQ) |                            |                            |                                            |                           |                            |                            |                                            |
|------------------------------------|----------------------------------------------------------------------------------------|----------------------------|----------------------------|--------------------------------------------|---------------------------|----------------------------|----------------------------|--------------------------------------------|
|                                    | Fear of labour, only in nulliparae                                                     |                            |                            |                                            | Fear of handicapped child |                            |                            |                                            |
|                                    | Low (3-9)<br>n=2851<br>%                                                               | High (10-12)<br>n=542<br>% | Crude model<br>OR (95% CI) | Adjusted model <sup>1</sup><br>OR (95% CI) | Low (4-11)<br>n=5384<br>% | High (12-16)<br>n=630<br>% | Crude model<br>OR (95% CI) | Adjusted model <sup>1</sup><br>OR (95% CI) |
| Augmentation <sup>2</sup>          |                                                                                        |                            |                            |                                            |                           |                            |                            |                                            |
| primary care                       | 28.5                                                                                   | 31.4                       | 1.19 (0.92-1.54)           | 1.11 (0.84-1.48)                           | 19.6                      | 19.9                       | 1.02 (0.78-1.35)           | 0.95 (0.71-1.27)                           |
| secondary care                     | 42.0                                                                                   | 43.9                       | 1.08 (0.80-1.47)           | 1.16 (0.83-1.62)                           | 32.8                      | 28.8                       | 0.84 (0.63-1.11)           | 0.80 (0.60-1.08)                           |
| Pain relief/sedation <sup>2</sup>  |                                                                                        |                            |                            |                                            |                           |                            |                            |                                            |
| primary care                       | 16.3                                                                                   | 22.5                       | <b>1.56 (1.17-2.08)</b>    | 1.33 (0.96-1.84)                           | 10.5                      | 12.6                       | 1.26 (0.90-1.75)           | 1.13 (0.79-1.61)                           |
| secondary care                     | 30.0                                                                                   | 44.4                       | <b>1.89 (1.39-2.58)</b>    | <b>1.84 (1.31-2.58)</b>                    | 23.1                      | 24.3                       | 1.05 (0.78-1.43)           | 0.99 (0.72-1.37)                           |
| Secondary caesarean <sup>2</sup>   |                                                                                        |                            |                            |                                            |                           |                            |                            |                                            |
| primary care                       | 7.6                                                                                    | 7.5                        | 1.00 (0.64-1.57)           | 0.82 (0.50-1.34)                           | 4.7                       | 5.9                        | 1.30 (0.81-2.08)           | 1.19 (0.73-1.94)                           |
| secondary care                     | 20.8                                                                                   | 22.9                       | 1.18 (0.82-1.68)           | 1.01 (0.68-1.50)                           | 17.5                      | 18.0                       | 1.06 (0.76-1.48)           | 1.07 (0.76-1.52)                           |
| First stage >12 hr <sup>3</sup>    |                                                                                        |                            |                            |                                            |                           |                            |                            |                                            |
| primary care                       | 30.1                                                                                   | 36.7                       | <b>1.38 (1.05-1.80)</b>    | 1.19 (0.88-1.60)                           | 19.5                      | 19.9                       | 1.07 (0.80-1.42)           | 0.95 (0.70-1.29)                           |
| secondary care                     | 32.5                                                                                   | 26.7                       | 0.75 (0.22-2.59)           | 0.64 (0.14-2.91)                           | 23.7                      | 17.6                       | 0.71 (0.19-2.65)           | 0.87 (0.17-4.54)                           |
| Second stage >=90 min <sup>4</sup> |                                                                                        |                            |                            |                                            |                           |                            |                            |                                            |
| primary care                       | 18.2                                                                                   | 16.1                       | 0.87 (0.61-1.23)           | 1.17 (0.80-1.72)                           | 10.6                      | 8.6                        | 0.79 (0.52-1.19)           | 0.86 (0.57-1.31)                           |
| secondary care                     | 15.5                                                                                   | 11.5                       | 0.74 (0.44-1.26)           | 1.18 (0.66-2.10)                           | 9.3                       | 6.0                        | 0.64 (0.36-1.15)           | 0.68 (0.38-1.23)                           |
| Instrumental delivery <sup>4</sup> |                                                                                        |                            |                            |                                            |                           |                            |                            |                                            |
| primary care                       | 15.9                                                                                   | 14.9                       | 0.95 (0.67-1.34)           | 1.10 (0.75-1.62)                           | 9.4                       | 8.0                        | 0.83 (0.55-1.26)           | 0.83 (0.53-1.28)                           |

|                |      |      |                  |                  |      |      |                  |                  |
|----------------|------|------|------------------|------------------|------|------|------------------|------------------|
| secondary care | 25.6 | 22.2 | 0.83 (0.55-1.25) | 1.22 (0.77-1.94) | 16.9 | 11.9 | 0.65 (0.42-1.01) | 0.65 (0.41-1.03) |
|----------------|------|------|------------------|------------------|------|------|------------------|------------------|

<sup>1</sup>Adjusted for BMI, maternal age, years of education, ethnicity, smoking, alcohol <sup>2</sup>Excluded women with primary caesarean section. <sup>3</sup>Excluded women with caesarean section; data available for 3535 women (only recorded in perinatal registry of midwives) <sup>4</sup>Excluded women with caesarean section (primary/ secondary)

For peer review only

1  
2  
3  
4  
5  
6  
7  
8  
9  
10  
11  
12  
13  
14  
15  
16  
17  
18  
19  
20  
21  
22  
23  
24  
25  
26  
27  
28  
29  
30  
31  
32  
33  
34  
35  
36  
37  
38  
39  
40  
41  
42  
43  
44  
45  
46  
47  
48  
49

1  
2  
3  
4  
5  
6  
7  
8  
9  
10  
11  
12  
13  
14  
15  
16  
17  
18  
19  
20  
21  
22  
23  
24  
25  
26  
27  
28  
29  
30  
31  
32  
33  
34  
35  
36  
37  
38  
39  
40  
41  
42  
43  
44  
45  
46  
47  
48  
49  
50  
51  
52  
53  
54  
55  
56  
57  
58  
59  
60

For peer review only



STROBE 2007 (v4) Statement—Checklist of items that should be included in reports of *cohort studies*

| Section/Topic                | Item # | Recommendation                                                                                                                                                                       | Reported on page # |
|------------------------------|--------|--------------------------------------------------------------------------------------------------------------------------------------------------------------------------------------|--------------------|
| Title and abstract           | 1      | (a) Indicate the study's design with a commonly used term in the title or the abstract                                                                                               | 1                  |
|                              |        | (b) Provide in the abstract an informative and balanced summary of what was done and what was found                                                                                  | 2-3                |
| <b>Introduction</b>          |        |                                                                                                                                                                                      |                    |
| Background/rationale         | 2      | Explain the scientific background and rationale for the investigation being reported                                                                                                 | 4-5                |
| Objectives                   | 3      | State specific objectives, including any prespecified hypotheses                                                                                                                     | 5                  |
| <b>Methods</b>               |        |                                                                                                                                                                                      |                    |
| Study design                 | 4      | Present key elements of study design early in the paper                                                                                                                              | 5                  |
| Setting                      | 5      | Describe the setting, locations, and relevant dates, including periods of recruitment, exposure, follow-up, and data collection                                                      | 5-6                |
| Participants                 | 6      | (a) Give the eligibility criteria, and the sources and methods of selection of participants. Describe methods of follow-up                                                           | 5-6                |
|                              |        | (b) For matched studies, give matching criteria and number of exposed and unexposed                                                                                                  |                    |
| Variables                    | 7      | Clearly define all outcomes, exposures, predictors, potential confounders, and effect modifiers. Give diagnostic criteria, if applicable                                             | 6-8                |
| Data sources/<br>measurement | 8*     | For each variable of interest, give sources of data and details of methods of assessment (measurement). Describe comparability of assessment methods if there is more than one group | 6-8                |
| Bias                         | 9      | Describe any efforts to address potential sources of bias                                                                                                                            | 6-8                |
| Study size                   | 10     | Explain how the study size was arrived at                                                                                                                                            | 6-7                |
| Quantitative variables       | 11     | Explain how quantitative variables were handled in the analyses. If applicable, describe which groupings were chosen and why                                                         | 8-9                |
| Statistical methods          | 12     | (a) Describe all statistical methods, including those used to control for confounding                                                                                                | 8-9                |
|                              |        | (b) Describe any methods used to examine subgroups and interactions                                                                                                                  | 8-9                |
|                              |        | (c) Explain how missing data were addressed                                                                                                                                          | 8-9                |
|                              |        | (d) If applicable, explain how loss to follow-up was addressed                                                                                                                       | 8-9                |
|                              |        | (e) Describe any sensitivity analyses                                                                                                                                                |                    |
| <b>Results</b>               |        |                                                                                                                                                                                      |                    |

|                          |     |                                                                                                                                                                                                              |               |
|--------------------------|-----|--------------------------------------------------------------------------------------------------------------------------------------------------------------------------------------------------------------|---------------|
| Participants             | 13* | (a) Report numbers of individuals at each stage of study—eg numbers potentially eligible, examined for eligibility, confirmed eligible, included in the study, completing follow-up, and analysed            | 10            |
|                          |     | (b) Give reasons for non-participation at each stage                                                                                                                                                         | 10            |
|                          |     | (c) Consider use of a flow diagram                                                                                                                                                                           | Suppl file    |
| Descriptive data         | 14* | (a) Give characteristics of study participants (eg demographic, clinical, social) and information on exposures and potential confounders                                                                     | Table 1, p 11 |
|                          |     | (b) Indicate number of participants with missing data for each variable of interest                                                                                                                          | All tables    |
|                          |     | (c) Summarise follow-up time (eg, average and total amount)                                                                                                                                                  |               |
| Outcome data             | 15* | Report numbers of outcome events or summary measures over time                                                                                                                                               | Table 2 and 3 |
| Main results             | 16  | (a) Give unadjusted estimates and, if applicable, confounder-adjusted estimates and their precision (eg, 95% confidence interval). Make clear which confounders were adjusted for and why they were included | Table 2 and 3 |
|                          |     | (b) Report category boundaries when continuous variables were categorized                                                                                                                                    |               |
|                          |     | (c) If relevant, consider translating estimates of relative risk into absolute risk for a meaningful time period                                                                                             |               |
| Other analyses           | 17  | Report other analyses done—eg analyses of subgroups and interactions, and sensitivity analyses                                                                                                               |               |
| <b>Discussion</b>        |     |                                                                                                                                                                                                              |               |
| Key results              | 18  | Summarise key results with reference to study objectives                                                                                                                                                     | 19            |
| <b>Limitations</b>       |     |                                                                                                                                                                                                              |               |
| Interpretation           | 20  | Give a cautious overall interpretation of results considering objectives, limitations, multiplicity of analyses, results from similar studies, and other relevant evidence                                   | 19-23         |
| Generalisability         | 21  | Discuss the generalisability (external validity) of the study results                                                                                                                                        | 23            |
| <b>Other information</b> |     |                                                                                                                                                                                                              |               |
| Funding                  | 22  | Give the source of funding and the role of the funders for the present study and, if applicable, for the original study on which the present article is based                                                | 24            |

\*Give information separately for cases and controls in case-control studies and, if applicable, for exposed and unexposed groups in cohort and cross-sectional studies.

**Note:** An Explanation and Elaboration article discusses each checklist item and gives methodological background and published examples of transparent reporting. The STROBE checklist is best used in conjunction with this article (freely available on the Web sites of PLoS Medicine at <http://www.plosmedicine.org/>, Annals of Internal Medicine at <http://www.annals.org/>, and Epidemiology at <http://www.epidem.com/>). Information on the STROBE Initiative is available at [www.strobe-statement.org](http://www.strobe-statement.org).
