# Supplementary material for: Possible relationship between general and pregnancy-related anxiety during the first half of pregnancy and the birth process: a prospective cohort study
Source: PubMed Central journal article supplement — BMJ Open. 2017 May 9;7(5):e013413. doi: 10.1136/bmjopen-2016-013413 (PMC5623367; doi:10.1136/bmjopen-2016-013413), 2017-05-09
Supplement: bmjopen-2016-013413supp001.pdf [file bmjopen-2016-013413supp001.pdf]

**Supplemental table 1. Univariable and multivariable associations between PRAQ fear of labour and PRAQ fear of child in the first half of pregnancy and (interventions in) the birth process, according to parity**

| Outcome                             | Pregnancy Related Anxiety, according to Pregnancy Related Anxiety Questionnaire (PRAQ) |                            |                            |                                            |                            |                             |                            |                                            |
|-------------------------------------|----------------------------------------------------------------------------------------|----------------------------|----------------------------|--------------------------------------------|----------------------------|-----------------------------|----------------------------|--------------------------------------------|
|                                     | Fear of labour, only in nulliparae                                                     |                            |                            |                                            | Fear of handicapped child  |                             |                            |                                            |
|                                     | Low (3-9)<br>n=3021<br>%                                                               | High (10-12)<br>n=574<br>% | Crude model<br>OR (95% CI) | Adjusted model <sup>1</sup><br>OR (95% CI) | Low (4-11)<br>n=5727*<br>% | High (12-16)<br>n=683*<br>% | Crude model<br>OR (95% CI) | Adjusted model <sup>1</sup><br>OR (95% CI) |
| Primary caesarean                   |                                                                                        |                            |                            |                                            |                            |                             |                            |                                            |
| Nulliparae                          | 5.2                                                                                    | 4.6                        | 0.89 (0.58-1.37)           | 1.26 (0.79-2.01)                           | 5.0                        | 5.4                         | 1.05 (0.65-1.69)           | 1.16 (0.72-1.88)                           |
| Multiparae                          |                                                                                        |                            |                            |                                            | 5.7                        | 8.7                         | <b>1.58 (1.00-2.48)</b>    | <b>1.69 (1.06-2.69)</b>                    |
| Induction <sup>2</sup>              |                                                                                        |                            |                            |                                            |                            |                             |                            |                                            |
| Nulliparae                          | 11.6                                                                                   | 13.3                       | 1.18 (0.90-1.56)           | 1.27 (0.93-1.72)                           | 11.6                       | 13.8                        | 1.16 (0.84-1.61)           | 1.19 (0.86-1.66)                           |
| Multiparae                          |                                                                                        |                            |                            |                                            | 9.7                        | 13.0                        | 1.40 (0.95-2.07)           | 1.33 (0.88-2.00)                           |
| Referral during labour <sup>3</sup> |                                                                                        |                            |                            |                                            |                            |                             |                            |                                            |
| Nulliparae                          | 51.3                                                                                   | 57.6                       | 1.36 (1.07-1.74)           | <b>1.39 (1.06-1.81)</b>                    | 51.7                       | 57.5                        | 1.31 (0.98-1.75)           | 1.31 (0.98-1.76)                           |
| Multiparae                          |                                                                                        |                            |                            |                                            | 20.7                       | 16.7                        | 0.79 (0.50-1.25)           | 0.71 (0.45-1.14)                           |
| Augmentation <sup>2</sup>           |                                                                                        |                            |                            |                                            |                            |                             |                            |                                            |
| Nulliparae                          | 33.5                                                                                   | 36.2                       | 1.15 (0.95-1.40)           | 1.15 (0.93-1.43)                           | 34.1                       | 32.6                        | 0.94 (0.74-1.19)           | 0.94 (0.74-1.19)                           |
| Multiparae                          |                                                                                        |                            |                            |                                            | 12.4                       | 11.2                        | 0.90 (0.59-1.35)           | 0.85 (0.56-1.30)                           |
| Pain relief/sedation <sup>2</sup>   |                                                                                        |                            |                            |                                            |                            |                             |                            |                                            |
| Nulliparae                          | 21.4                                                                                   | 30.8                       | 1.70 (1.38-2.09)           | <b>1.58 (1.26-1.99)</b>                    | 22.5                       | 25.8                        | 1.22 (0.95-1.57)           | 1.14 (0.88-1.47)                           |
| Multiparae                          |                                                                                        |                            |                            |                                            | 6.0                        | 6.2                         | 0.93 (0.53-1.65)           | 0.94 (0.53-1.67)                           |
| Secondary caesarean <sup>2</sup>    |                                                                                        |                            |                            |                                            |                            |                             |                            |                                            |
| Nulliparae                          | 12.5                                                                                   | 13.4                       | 1.12 (0.85-1.47)           | 1.02 (0.75-1.37)                           | 12.3                       | 14.8                        | 1.27 (0.93-1.73)           | 1.30 (0.95-1.79)                           |
| Multiparae                          |                                                                                        |                            |                            |                                            | 5.9                        | 5.8                         | 0.98 (0.56-1.73)           | 1.03 (0.58-1.84)                           |

|                                    |      |      |                         |                  |      |      |                  |                  |
|------------------------------------|------|------|-------------------------|------------------|------|------|------------------|------------------|
| First stage >12 hr <sup>4</sup>    |      |      |                         |                  |      |      |                  |                  |
| Nulliparae                         | 30.3 | 36.1 | <b>1.34 (1.03-1.73)</b> | 1.14 (0.86-1.53) | 31.0 | 32.2 | 1.10 (0.81-1.51) | 1.03 (0.75-1.42) |
| Multiparae                         |      |      |                         |                  | 4.9  | 2.1  | 0.45 (0.14-1.45) | 0.44 (0.14-1.43) |
| Second stage >=90 min <sup>5</sup> |      |      |                         |                  |      |      |                  |                  |
| Nulliparae                         | 17.3 | 14.4 | 0.83 (0.62-1.10)        | 1.14 (0.83-1.57) | 17.3 | 12.8 | 0.71 (0.50-1.01) | 0.77 (0.54-1.11) |
| Multiparae                         |      |      |                         |                  | 1.6  | 0.8  | 0.53 (0.13-2.20) | 0.53 (0.13-2.23) |
| Instrumental delivery <sup>5</sup> |      |      |                         |                  |      |      |                  |                  |
| Nulliparae                         | 19.2 | 17.3 | 0.90 (0.69-1.17)        | 1.17 (0.88-1.57) | 19.3 | 15.4 | 0.74 (0.54-1.03) | 0.80 (0.57-1.11) |
| Multiparae                         |      |      |                         |                  | 3.2  | 2.0  | 0.66 (0.26-1.65) | 0.69 (0.28-1.75) |

<sup>1</sup>Adjusted for BMI, maternal age, years of education, ethnicity, smoking, alcohol <sup>2</sup>Excluded women with primary caesarean section. <sup>3</sup>Only women under primary care at start of labour

<sup>4</sup>Excluded women with caesarean section; data available for 3535 women (only recorded in perinatal registry of midwives) <sup>5</sup>Excluded women with caesarean section (primary/ secondary)

\*Including four respondents who did not complete the total PRAQ, but who completed the subscale 'fear of child'.
