# Supplementary material for: Possible relationship between general and pregnancy-related anxiety during the first half of pregnancy and the birth process: a prospective cohort study
Source: PubMed Central journal article supplement — BMJ Open. 2017 May 9;7(5):e013413. doi: 10.1136/bmjopen-2016-013413 (PMC5623367; doi:10.1136/bmjopen-2016-013413), 2017-05-09
Supplement: bmjopen-2016-013413supp002.pdf [file bmjopen-2016-013413supp002.pdf]

**Supplemental table 2. Univariable and multivariable associations between PRAQ fear of labour and PRAQ fear of child in the first half of pregnancy and (interventions in) the birth process, according to ethnicity**

| Outcome                                   | Fear of labour, only in nulliparae |              |                         |                             | Fear of handicapped child |              |                  |                             |
|-------------------------------------------|------------------------------------|--------------|-------------------------|-----------------------------|---------------------------|--------------|------------------|-----------------------------|
|                                           | Low (3-9)                          | High (10-12) | Crude model             | Adjusted model <sup>1</sup> | Low (4-11)                | High (12-16) | Crude model      | Adjusted model <sup>1</sup> |
|                                           | n=3021                             | n=574        |                         |                             | n=5727*                   | n=683*       |                  |                             |
|                                           | %                                  | %            | OR (95% CI)             | OR (95% CI)                 | %                         | %            | OR (95%-CI)      | OR (95%-CI)                 |
| <b>Primary caesarean</b>                  |                                    |              |                         |                             |                           |              |                  |                             |
| Dutch                                     | 5.9                                | 5.2          | 0.91 (0.44-1.91)        | 0.98 (0.46-2.06)            | 5.8                       | 7.1          | 1.25 (0.79-1.97) | 1.20 (0.75-1.90)            |
| Turkish                                   | 0.0                                | 3.4          | p=0.19                  | p=1.00                      | 3.8                       | 1.8          | 0.56 (0.07-4.59) | 0.59 (0.06-5.33)            |
| Moroccan                                  | 2.3                                | 3.2          | 1.40 (0.28-7.09)        | 1.33 (0.26-6.82)            | 3.3                       | 3.8          | 1.16 (0.32-4.18) | 1.34 (0.37-4.92)            |
| Black                                     | 6.9                                | 1.4          | 0.25 (0.03-1.97)        | 0.50 (0.06-4.33)            | 5.7                       | 4.7          | 0.43 (0.06-3.27) | 0.61 (0.08-4.69)            |
| <b>Induction<sup>2</sup></b>              |                                    |              |                         |                             |                           |              |                  |                             |
| Dutch                                     | 11.7                               | 14.5         | 1.33 (0.82-2.17)        | 1.29 (0.78-2.13)            | 10.5                      | 13.8         | 1.37 (0.96-1.94) | 1.31 (0.91-1.90)            |
| Turkish                                   | 13.3                               | 14.3         | 1.01 (0.35-2.91)        | 1.08 (0.36-3.27)            | 12.3                      | 16.1         | 1.24 (0.51-3.06) | 1.31 (0.51-3.35)            |
| Moroccan                                  | 7.1                                | 14.4         | 2.20 (0.89-5.39)        | 2.41 (0.96-6.05)            | 9.7                       | 10.5         | 0.98 (0.42-2.29) | 1.02 (0.43-2.43)            |
| Black                                     | 11.7                               | 14.5         | 1.28 (0.54-3.01)        | 1.44 (0.58-3.61)            | 10.4                      | 9.8          | 0.73 (0.22-2.46) | 0.85 (0.24-2.30)            |
| <b>Referral during labour<sup>3</sup></b> |                                    |              |                         |                             |                           |              |                  |                             |
| Dutch                                     | 49.9                               | 62.0         | <b>1.78 (1.13-2.80)</b> | <b>1.94 (1.22-3.10)</b>     | 36.3                      | 42.0         | 1.27 (0.91-1.76) | 1.17 (0.82-1.68)            |
| Turkish                                   | 47.7                               | 59.4         | 1.58 (0.61-4.10)        | 1.45 (0.53-3.99)            | 39.4                      | 32.4         | 0.86 (0.38-1.96) | 0.67 (0.27-1.65)            |
| Moroccan                                  | 57.3                               | 67.7         | 1.52 (0.76-3.04)        | 1.63 (0.80-3.32)            | 45.2                      | 43.5         | 0.95 (0.50-1.82) | 1.00 (0.49-2.02)            |
| Black                                     | 52.8                               | 35.0         | 0.49 (0.23-1.07)        | 0.54 (0.23-1.27)            | 38.8                      | 41.4         | 1.17 (0.53-2.59) | 1.14 (0.48-2.68)            |
| <b>Augmentation<sup>2</sup></b>           |                                    |              |                         |                             |                           |              |                  |                             |

|                                    |      |      |                         |                                     |      |      |                         |                          |
|------------------------------------|------|------|-------------------------|-------------------------------------|------|------|-------------------------|--------------------------|
| Dutch                              | 32.3 | 37.9 | 1.35 (0.95-1.92)        | 1.42 (0.99-2.04)                    | 23.4 | 27.8 | 1.25 (0.95-1.64)        | 1.17 (0.88-1.56)         |
| Turkish                            | 30.7 | 32.1 | 1.01 (0.47-2.15)        | 0.90 (0.41-2.00)                    | 23.0 | 17.9 | 0.64 (0.28-1.46)        | 0.58 (0.25-1.37)         |
| Moroccan                           | 37.3 | 33.3 | 0.81 (0.46-1.44)        | 0.87 (0.48-1.57)                    | 24.7 | 19.7 | 0.79 (0.43-1.47)        | 0.78 (0.41-1.49)         |
| Black                              | 28.9 | 30.9 | 1.10 (0.58-2.06)        | 1.10 (0.56-2.14)                    | 22.5 | 15.0 | 0.63 (0.26-1.54)        | 0.58 (0.23-1.48)         |
| Pain relief/ sedation <sup>2</sup> |      |      |                         |                                     |      |      |                         |                          |
| Dutch                              | 19.4 | 34.5 | <b>2.29 (1.59-3.30)</b> | <b>2.17 (1.49-3.15)<sup>6</sup></b> | 14.2 | 19.1 | <b>1.42 (1.04-1.94)</b> | 1.36 (0.99-1.87)         |
| Turkish                            | 32.0 | 23.2 | 0.69 (0.31-1.54)        | 0.71 (0.30-1.66) <sup>6</sup>       | 15.5 | 16.1 | 1.10 (0.47-2.56)        | 1.15 (0.48-2.76)         |
| Moroccan                           | 23.0 | 24.4 | 1.01 (0.53-1.91)        | 1.03 (0.53-2.00) <sup>6</sup>       | 13.9 | 14.5 | 1.07 (0.53-2.17)        | 1.00 (0.49-2.06)         |
| Black                              | 23.3 | 32.4 | 1.58 (0.84-3.00)        | 1.86 (0.94-3.69) <sup>6</sup>       | 15.0 | 10.0 | 0.65 (0.22-1.89)        | 0.50 (0.17-1.50)         |
| Secondary caesarean <sup>2</sup>   |      |      |                         |                                     |      |      |                         |                          |
| Dutch                              | 11.0 | 13.1 | 1.19 (0.71-2.00)        | 1.15 (0.67-1.96)                    | 8.6  | 12.2 | <b>1.47 (1.01-2.14)</b> | 1.38 (0.94-2.03)         |
| Turkish                            | 10.7 | 10.7 | 0.97 (0.32-1.98)        | 0.91 (0.28-2.98)                    | 7.1  | 8.9  | 1.55 (0.53-4.48)        | 1.63 (0.53-5.04)         |
| Moroccan                           | 15.9 | 10.0 | 0.58 (0.25-1.35)        | 0.59 (0.25-1.42)                    | 8.9  | 9.2  | 1.11 (0.47-2.62)        | 1.22 (0.50-2.99)         |
| Black                              | 20.1 | 14.7 | 0.72 (0.33-1.58)        | 0.84 (0.37-1.91)                    | 12.8 | 7.5  | 0.58 (0.17-2.00)        | 0.65 (0.19-2.28)         |
| First stage >12 hr <sup>4</sup>    |      |      |                         |                                     |      |      |                         |                          |
| Dutch                              | 27.8 | 37.8 | <b>1.64 (1.03-2.62)</b> | <b>1.64 (1.02-2.64)</b>             | 17.8 | 21.9 | 1.30 (0.88-1.92)        | 1.25 (0.82-1.90)         |
| Turkish                            | 34.9 | 29.0 | 0.80 (0.29-2.20)        | 0.55 (0.17-1.77)                    | 19.1 | 9.4  | 0.49 (0.14-1.76)        | <b>0.24 (0.06-0.996)</b> |
| Moroccan                           | 35.2 | 35.0 | 0.96 (0.48-1.92)        | 0.96 (0.46-1.99)                    | 20.3 | 20.0 | 1.02 (0.46-2.26)        | 1.00 (0.41-2.43)         |
| Black                              | 30.5 | 32.3 | 1.07 (0.44-2.59)        | 1.11 (0.43-2.89)                    | 21.0 | 19.2 | 0.94 (0.33-2.67)        | 1.04 (0.32-3.42)         |
| Second stage >=90 min <sup>5</sup> |      |      |                         |                                     |      |      |                         |                          |
| Dutch                              | 18.5 | 24.2 | 1.42 (0.91-2.19)        | <b>1.64 (1.05-2.57)</b>             | 12.0 | 10.0 | 0.82 (0.53-1.25)        | 0.80 (0.51-1.25)         |

|                                    |      |      |                         |                         |      |     |                  |                         |
|------------------------------------|------|------|-------------------------|-------------------------|------|-----|------------------|-------------------------|
| Turkish                            | 9.1  | 12.8 | 1.75 (0.50-6.15)        | 1.93 (0.51-7.30)        | 5.3  | 6.1 | 1.43 (0.38-5.44) | 1.13 (0.28-4.59)        |
| Moroccan                           | 16.2 | 8.8  | 0.41 (0.15-1.08)        | 0.43 (0.16-1.17)        | 7.1  | 2.9 | 0.41 (0.10-1.80) | 0.43 (0.10-1.93)        |
| Black                              | 4.9  | 5.9  | 1.24 (0.30-5.17)        | 0.88 (0.18-4.29)        | 3.0  | 5.6 | 1.96 (0.42-9.21) | 1.40 (0.27-7.19)        |
| Instrumental delivery <sup>5</sup> |      |      |                         |                         |      |     |                  |                         |
| Dutch                              | 20.4 | 19.0 | 0.95 (0.60-1.50)        | 1.03 (0.64-1.65)        | 13.6 | 9.5 | 0.66 (0.43-1.02) | <b>0.61 (0.39-0.96)</b> |
| Turkish                            | 9.0  | 18.0 | 1.87 (0.60-5.80)        | 2.37 (0.69-8.12)        | 5.7  | 7.8 | 1.17 (0.32-4.34) | 1.17 (0.29-4.71)        |
| Moroccan                           | 13.2 | 11.1 | 0.81 (0.33-1.98)        | 0.84 (0.34-2.09)        | 7.2  | 5.8 | 0.80 (0.27-2.37) | 0.85 (0.28-2.61)        |
| Black                              | 5.5  | 13.8 | <b>2.93 (1.01-8.55)</b> | <b>3.22 (1.03-10.1)</b> | 4.6  | 5.4 | 1.20 (0.27-5.41) | 0.96 (0.20-4.65)        |

<sup>1</sup>Adjusted for BMI, maternal age, years of education, ethnicity, smoking, alcohol, parity (only in fear of handicapped child) <sup>2</sup>Excluded women with primary caesarean section. <sup>3</sup>Only women under primary care at start of labour <sup>4</sup>Excluded women with caesarean section; data available for 3530 women (only recorded in perinatal registry of midwives) <sup>5</sup>Excluded women with caesarean section (primary/ secondary) <sup>6</sup> interaction ethnicity and fear of labour p=0.03  
 \*Including four respondents who did not complete the total PRAQ, but who completed the subscale 'fear of child'.
