# Supplementary material for: Possible relationship between general and pregnancy-related anxiety during the first half of pregnancy and the birth process: a prospective cohort study
Source: PubMed Central journal article supplement — BMJ Open. 2017 May 9;7(5):e013413. doi: 10.1136/bmjopen-2016-013413 (PMC5623367; doi:10.1136/bmjopen-2016-013413), 2017-05-09
Supplement: bmjopen-2016-013413supp003.pdf [file bmjopen-2016-013413supp003.pdf]

**Supplemental Table 3. Univariable and multivariable associations between first trimester general and pregnancy related anxiety and (interventions in) the birth process, according to care at start of labour**

| Outcome                            | General anxiety    |                     |                            |                                            | Pregnancy-related anxiety |                    |                            |                                            |
|------------------------------------|--------------------|---------------------|----------------------------|--------------------------------------------|---------------------------|--------------------|----------------------------|--------------------------------------------|
|                                    | Low<br>n=4126<br>% | High<br>n=1850<br>% | Crude model<br>OR (95% CI) | Adjusted model <sup>1</sup><br>OR (95% CI) | Low<br>n=5348<br>%        | High<br>n=662<br>% | Crude model<br>OR (95% CI) | Adjusted model <sup>1</sup><br>OR (95% CI) |
| Augmentation <sup>2</sup>          |                    |                     |                            |                                            |                           |                    |                            |                                            |
| primary care                       | 19.7               | 19.4                | 1.00 (0.84-1.20)           | 1.01 (0.83-1.24)                           | 19.4                      | 21.8               | 1.17 (0.91-1.52)           | 0.96 (0.73-1.27)                           |
| secondary care                     | 34.7               | 27.7                | 0.73 (0.61-0.89)           | 0.83 (0.67-1.02)                           | 32.4                      | 31.8               | 0.98 (0.74-1.30)           | 0.95 (0.70-1.28)                           |
| Pain relief/sedation <sup>2</sup>  |                    |                     |                            |                                            |                           |                    |                            |                                            |
| primary care                       | 10.5               | 11.3                | 1.10 (0.88-1.38)           | 1.09 (0.84-1.40)                           | 10.4                      | 13.9               | <b>1.45 (1.06-1.98)</b>    | 1.17 (0.84-1.63)                           |
| secondary care                     | 22.6               | 24.6                | 1.12 (0.91-1.37)           | <b>1.26 (1.004-1.58)</b>                   | 21.9                      | 33.7               | <b>1.85 (1.40-2.45)</b>    | <b>1.81 (1.33-2.45)</b>                    |
| Secondary caesarean <sup>2</sup>   |                    |                     |                            |                                            |                           |                    |                            |                                            |
| primary care                       | 4.9                | 4.6                 | 0.96 (0.68-1.34)           | 0.91 (0.63-1.31)                           | 4.7                       | 5.8                | 1.23 (0.78-1.95)           | 0.97 (0.60-1.58)                           |
| secondary care                     | 19.2               | 16.6                | 0.91 (0.72-1.15)           | 0.94 (0.73-1.21)                           | 17.4                      | 19.5               | 1.16 (0.83-1.61)           | 1.16 (0.82-1.65)                           |
| First stage >12 hr <sup>3</sup>    |                    |                     |                            |                                            |                           |                    |                            |                                            |
| primary care                       | 19.4               | 19.8                | 1.03 (0.85-1.24)           | 1.04 (0.84-1.29)                           | 19.2                      | 22.1               | 1.23 (0.94-1.62)           | 0.99 (0.73-1.33)                           |
| secondary care                     | 21.2               | 28.6                | 1.55 (0.65-3.68)           | 1.80 (0.65-5.02)                           | 23.6                      | 12.5               | 0.48 (0.06-4.03)           | 0.30 (0.03-3.43)                           |
| Second stage >=90 min <sup>4</sup> |                    |                     |                            |                                            |                           |                    |                            |                                            |
| primary care                       | 11.3               | 8.0                 | 0.69 (0.53-0.90)           | 0.90 (0.67-1.21)                           | 10.4                      | 10.3               | 0.95 (0.65-1.37)           | 0.97 (0.65-1.45)                           |
| secondary care                     | 10.7               | 5.8                 | 0.51 (0.34-0.74)           | 0.77 (0.51-1.16)                           | 9.3                       | 6.7                | 0.72 (0.41-1.28)           | 0.93 (0.51-1.70)                           |
| Instrumental delivery <sup>4</sup> |                    |                     |                            |                                            |                           |                    |                            |                                            |
| primary care                       | 9.7                | 8.2                 | 0.85 (0.65-1.10)           | 1.05 (0.78-1.39)                           | 9.1                       | 10.2               | 1.13 (0.78-1.62)           | 1.08 (0.73-1.59)                           |
| secondary care                     | 18.4               | 12.8                | 0.66 (0.50-0.87)           | 0.97 (0.71-1.30)                           | 16.7                      | 12.9               | 0.72 (0.47-1.11)           | 0.87 (0.55-1.38)                           |

<sup>1</sup>Adjusted for BMI, maternal age, years of education, ethnicity, smoking, alcohol <sup>2</sup>Excluded women with primary caesarean section <sup>3</sup>Excluded women with caesarean section; data available for 3530 women (only recorded in perinatal registry of midwives) <sup>4</sup>Excluded women with caesarean section (primary/secondary)
