# Supplementary material for: Possible relationship between general and pregnancy-related anxiety during the first half of pregnancy and the birth process: a prospective cohort study
Source: PubMed Central journal article supplement — BMJ Open. 2017 May 9;7(5):e013413. doi: 10.1136/bmjopen-2016-013413 (PMC5623367; doi:10.1136/bmjopen-2016-013413), 2017-05-09
Supplement: bmjopen-2016-013413supp004.pdf [file bmjopen-2016-013413supp004.pdf]

**Supplemental table 4. Univariable and multivariable associations between PRAQ fear of labour and PRAQ fear of child in the first half of pregnancy and (interventions in) the birth process, according to care at start of labour**

| Outcome                            | Pregnancy Related Anxiety, according to Pregnancy Related Anxiety Questionnaire (PRAQ) |                            |                            |                                            |                           |                            |                            |                                            |
|------------------------------------|----------------------------------------------------------------------------------------|----------------------------|----------------------------|--------------------------------------------|---------------------------|----------------------------|----------------------------|--------------------------------------------|
|                                    | Fear of labour, only in nulliparae                                                     |                            |                            |                                            | Fear of handicapped child |                            |                            |                                            |
|                                    | Low (3-9)<br>n=2851<br>%                                                               | High (10-12)<br>n=542<br>% | Crude model<br>OR (95% CI) | Adjusted model <sup>1</sup><br>OR (95% CI) | Low (4-11)<br>n=5384<br>% | High (12-16)<br>n=630<br>% | Crude model<br>OR (95% CI) | Adjusted model <sup>1</sup><br>OR (95% CI) |
| Augmentation <sup>2</sup>          |                                                                                        |                            |                            |                                            |                           |                            |                            |                                            |
| primary care                       | 28.5                                                                                   | 31.4                       | 1.19 (0.92-1.54)           | 1.11 (0.84-1.48)                           | 19.6                      | 19.9                       | 1.02 (0.78-1.35)           | 0.95 (0.71-1.27)                           |
| secondary care                     | 42.0                                                                                   | 43.9                       | 1.08 (0.80-1.47)           | 1.16 (0.83-1.62)                           | 32.8                      | 28.8                       | 0.84 (0.63-1.11)           | 0.80 (0.60-1.08)                           |
| Pain relief/sedation <sup>2</sup>  |                                                                                        |                            |                            |                                            |                           |                            |                            |                                            |
| primary care                       | 16.3                                                                                   | 22.5                       | <b>1.56 (1.17-2.08)</b>    | 1.33 (0.96-1.84)                           | 10.5                      | 12.6                       | 1.26 (0.90-1.75)           | 1.13 (0.79-1.61)                           |
| secondary care                     | 30.0                                                                                   | 44.4                       | <b>1.89 (1.39-2.58)</b>    | <b>1.84 (1.31-2.58)</b>                    | 23.1                      | 24.3                       | 1.05 (0.78-1.43)           | 0.99 (0.72-1.37)                           |
| Secondary caesarean <sup>2</sup>   |                                                                                        |                            |                            |                                            |                           |                            |                            |                                            |
| primary care                       | 7.6                                                                                    | 7.5                        | 1.00 (0.64-1.57)           | 0.82 (0.50-1.34)                           | 4.7                       | 5.9                        | 1.30 (0.81-2.08)           | 1.19 (0.73-1.94)                           |
| secondary care                     | 20.8                                                                                   | 22.9                       | 1.18 (0.82-1.68)           | 1.01 (0.68-1.50)                           | 17.5                      | 18.0                       | 1.06 (0.76-1.48)           | 1.07 (0.76-1.52)                           |
| First stage >12 hr <sup>3</sup>    |                                                                                        |                            |                            |                                            |                           |                            |                            |                                            |
| primary care                       | 30.1                                                                                   | 36.7                       | <b>1.38 (1.05-1.80)</b>    | 1.19 (0.88-1.60)                           | 19.5                      | 19.9                       | 1.07 (0.80-1.42)           | 0.95 (0.70-1.29)                           |
| secondary care                     | 32.5                                                                                   | 26.7                       | 0.75 (0.22-2.59)           | 0.64 (0.14-2.91)                           | 23.7                      | 17.6                       | 0.71 (0.19-2.65)           | 0.87 (0.17-4.54)                           |
| Second stage >=90 min <sup>4</sup> |                                                                                        |                            |                            |                                            |                           |                            |                            |                                            |
| primary care                       | 18.2                                                                                   | 16.1                       | 0.87 (0.61-1.23)           | 1.17 (0.80-1.72)                           | 10.6                      | 8.6                        | 0.79 (0.52-1.19)           | 0.86 (0.57-1.31)                           |
| secondary care                     | 15.5                                                                                   | 11.5                       | 0.74 (0.44-1.26)           | 1.18 (0.66-2.10)                           | 9.3                       | 6.0                        | 0.64 (0.36-1.15)           | 0.68 (0.38-1.23)                           |
| Instrumental delivery <sup>4</sup> |                                                                                        |                            |                            |                                            |                           |                            |                            |                                            |
| primary care                       | 15.9                                                                                   | 14.9                       | 0.95 (0.67-1.34)           | 1.10 (0.75-1.62)                           | 9.4                       | 8.0                        | 0.83 (0.55-1.26)           | 0.83 (0.53-1.28)                           |

|                |      |      |                  |                  |      |      |                  |                  |
|----------------|------|------|------------------|------------------|------|------|------------------|------------------|
| secondary care | 25.6 | 22.2 | 0.83 (0.55-1.25) | 1.22 (0.77-1.94) | 16.9 | 11.9 | 0.65 (0.42-1.01) | 0.65 (0.41-1.03) |
|----------------|------|------|------------------|------------------|------|------|------------------|------------------|

---

<sup>1</sup>Adjusted for BMI, maternal age, years of education, ethnicity, smoking, alcohol <sup>2</sup>Excluded women with primary caesarean section. <sup>3</sup>Excluded women with caesarean section; data available for 3535 women (only recorded in perinatal registry of midwives) <sup>4</sup>Excluded women with caesarean section (primary/ secondary)
